# Supplementary material
Source: PubMed Central journal article supplement (PMC2536611)
Supplement: NIHMS62751-supplement-1File002.pdf [file NIHMS62751-supplement-1File002.pdf]

# Supporting Information

## Inhibitors of the Interaction of Thyroid Hormone Receptor and Coactivators: Preliminary Structure–Activity Relationships

Leggy A. Arnold,<sup>a</sup> Aaron Kosinski,<sup>a</sup> Eva Estébanez-Perpiñá,<sup>b</sup> and R. Kiplin Guy<sup>a\*</sup>

|                                                                        |    |
|------------------------------------------------------------------------|----|
| General experimental section .....                                     | 2  |
| General procedure for 3a-k: .....                                      | 2  |
| General procedure for 1, 4a and 4g .....                               | 4  |
| General procedure for 5b-f: .....                                      | 4  |
| General procedure for 4b-f: .....                                      | 5  |
| General procedure for 6a-m: .....                                      | 6  |
| General procedure for 7a-g: .....                                      | 7  |
| General procedure for 8a-b: .....                                      | 8  |
| General procedure for 8f: .....                                        | 9  |
| Table 1. Summary of $\beta$ -aminophenylketones 3a–k data: .....       | 10 |
| Table 2. Summary of enones 1 and 4a–e and allylic alcohols 5b–e: ..... | 11 |
| Table 3. Summary of IC50 values of 6a–m: .....                         | 12 |
| Table 4. Summary of acrylamides 7a–g: .....                            | 13 |
| Table 5. Summary of electrophilic compounds 8a–f: .....                | 14 |
| Spectral data 3a .....                                                 | 15 |
| Spectral data 3b .....                                                 | 16 |
| Spectral data 3c .....                                                 | 17 |
| Spectral data 3d .....                                                 | 18 |
| Spectral data 3e .....                                                 | 19 |
| Spectral data 3f .....                                                 | 20 |
| Spectral data 3g .....                                                 | 21 |
| Spectral data 3h .....                                                 | 22 |
| Spectral data 3i .....                                                 | 23 |
| Spectral data 3j .....                                                 | 24 |
| Spectral data 3k .....                                                 | 25 |
| Spectral data 1 .....                                                  | 26 |
| Spectral data 4a .....                                                 | 27 |
| Spectral data 4b .....                                                 | 28 |
| Spectral data 4c .....                                                 | 29 |
| Spectral data 4d .....                                                 | 30 |
| Spectral data 4e .....                                                 | 31 |
| Spectral data 4f .....                                                 | 32 |
| Spectral data 4g .....                                                 | 33 |
| Spectral data 5b .....                                                 | 35 |
| Spectral data 5c .....                                                 | 35 |
| Spectral data 5d .....                                                 | 36 |
| Spectral data 5e .....                                                 | 37 |
| Spectral data 5f .....                                                 | 38 |
| Spectral data 6a .....                                                 | 39 |
| Spectral data 6b .....                                                 | 40 |

|                  |    |
|------------------|----|
| Spectral data 6c | 41 |
| Spectral data 6d | 42 |
| Spectral data 6e | 43 |
| Spectral data 6f | 44 |
| Spectral data 6g | 45 |
| Spectral data 6h | 46 |
| Spectral data 6i | 47 |
| Spectral data 6j | 48 |
| Spectral data 6k | 49 |
| Spectral data 6l | 50 |
| Spectral data 6m | 51 |
| Spectral data 7a | 52 |
| Spectral data 7b | 53 |
| Spectral data 7c | 54 |
| Spectral data 7d | 55 |
| Spectral data 7e | 56 |
| Spectral data 7f | 57 |
| Spectral data 7g | 58 |
| Spectral data 8a | 59 |
| Spectral data 8b | 60 |
| Spectral data 8c | 61 |
| Spectral data 8d | 62 |
| Spectral data 8e | 63 |
| Spectral data 8f | 64 |
| Spectral data 8g | 65 |

## General experimental section

**General Considerations.** Unless otherwise noted, all materials were obtained from commercial suppliers and used without further purification. All solvents used were dried using an aluminum oxide column. Thin-layer chromatography was performed on precoated silica gel 60 F254 plates. Purification of compounds was done by reverse-phase high-performance liquid chromatography (HPLC; Flex [Biotage] and RP-C18 Xterra column 5 $\mu$ m, 19 mm  $\times$  50 mm [Waters]) or by normal phase column chromatography (SP1 [Biotage], Silica gel 230–400 mesh) followed by evaporation (HT-4X evaporator [Genevac]). The analysis (photodiode array, total ion count, and expected mass [m/z]) was performed using a HPLC-MS (Alliance HT, Micromass ZQ 4000 and RP-C18 Xterra column 5  $\mu$ m, 6 mm  $\times$  50 mm [Waters], flow rate: 1 mL/min; gradient: 30:70 [methanol : water (0.05% TFA)]) to 100% MeOH over 10 min. NMR spectra were recorded on a Bruker 400 MHz and referenced internally to the residual resonance in CDCl<sub>3</sub> ( $\delta$  7.26 ppm) for hydrogen and ( $\delta$  = 77 ppm) for carbon atoms.

**General procedure for 3a-k:** To a suspension of AlCl<sub>3</sub> (26.6 g, 200 mmol) in CH<sub>2</sub>Cl<sub>2</sub> (200 mL) was added acryloyl chloride (9.78 mL, 100 mmol) at 0°C. The resulting clear solution was treated with 1-phenylhexane (18.9 mL, 100 mmol) and stirred for 2 h at room temperature. The reaction was poured into a mixture of concentrated HCl (40 mL) and ice (200 g). The organic layer was separated, the aqueous layer was extracted with CH<sub>2</sub>Cl<sub>2</sub> (100 mL), and the combined organic layers were washed with saturated aqueous NaHCO<sub>3</sub> (100 mL) and brine (100 mL) and dried over MgSO<sub>4</sub>. The filtered solution was concentrated in vacuo to yield compounds **1** and **2** (15.6 g, 70%) as a yellow oil in a ratio of 4:1. Next, 9 g (45 mmol) of the crude product was dissolved in THF (30 mL) to obtain a 1.5 M stock solution. The corresponding amines (3 mmol) were dissolved in THF (8 mL) and treated with 2 mL of the stock solution (1.5 M solution of **1** and **2**) and stirred at room temperature overnight. The reaction mixtures were evaporated, and the residual amines were removed by repeated azeotropic evaporations using ethanol to yield the corresponding  $\beta$ -aminophenylketones in 85–97% yield with a purity of 85–95%, as determined by HPLC-MS.

Subsequent purification by RP-HPLC (flow rate: 20 mL/min; gradient: 0.05% formic acid in water to 0.05% formic acid in 80% acetonitrile over 15 min) resulted in desired product (> 99% purity).

**(3a) 1-(4-Hexylphenyl)-3-(methyl(phenethyl)amino)propan-1-one:** white solid, mp 147-149°C, yield 84%; <sup>1</sup>H-NMR (400 MHz)  $\delta$  = 7.73 (d,  $J$  = 8.3 Hz, 2H), 7.19-7.06 (m, 8H), 3.56-3.51 (m, 1H), 3.45-3.33 (m, 3H), 3.08-3.25 (m, 1H), 3.13-3.08 (m, 1H), 2.98-2.94 (m, 2H), 2.75 (s, 3H), 1.49-1.46 (m, 2H), 1.20-1.11 (m, 6H), 0.73 (t,  $J$  = 6.9 Hz, 3H); <sup>13</sup>C-NMR (100 MHz)  $\delta$  = 195.32, 150.25, 135.37, 133.11, 129.10, 128.97, 128.66, 128.32, 127.51, 58.13, 51.36, 40.47, 36.04, 33.18, 31.61, 30.95, 30.43, 28.86, 22.53, 14.04; MS calcd for C<sub>24</sub>H<sub>33</sub>NO (H<sup>+</sup>) 352.26, found 352.32.

**(3b) 1-(4-Hexylphenyl)-3-((2-hydroxyethyl)(methyl)amino)propan-1-one:** White waxy solid, yield 87%; <sup>1</sup>H-NMR (400 MHz)  $\delta$  = 7.73 (d,  $J$  = 8.3 Hz, 2H), 7.26 (d,  $J$  = 8.2 Hz, 2H), 3.97 (t,  $J$  = 4.8 Hz, 2H), 3.69-3.66 (m, 1H), 3.55-3.49 (m, 3H), 3.38-3.33 (m, 1H), 3.13-3.09 (m, 1H), 3.89 (s, 3H), 2.63 (t,  $J$  = 7.6 Hz, 2H), 1.60-1.55 (m, 2H), 1.31-1.22 (m, 6H), 0.84 (t,  $J$  = 7.1 Hz, 3H); <sup>13</sup>C-NMR (100 MHz)  $\delta$  = 195.40, 162.35, 150.39, 133.08, 129.01, 128.36, 59.59, 56.14, 52.56, 41.62, 36.06, 33.12, 31.62, 30.97, 28.88, 22.55, 14.05; MS calcd for C<sub>17</sub>H<sub>27</sub>NO<sub>2</sub> (H<sup>+</sup>) 291.22, found 291.22.

**(3c) 3-(Diisopropylamino)-1-(4-hexylphenyl)propan-1-one:** Pale yellow waxy solid, yield 81%; <sup>1</sup>H-NMR (400 MHz)  $\delta$  = 7.79 (d,  $J$  = 8.1 Hz, 2H), 7.18 (d,  $J$  = 8.1 Hz, 2H), 6.06 (s (br), NH), 3.62-3.56 (m, 4H), 3.36-3.31 (m, 2H), 2.57 (t,  $J$  = 7.6 Hz, 2H), 1.54-1.43 (m, 2H), 1.35 (d,  $J$  = 6.6 Hz, 6H), 1.31 (d,  $J$  = 6.7 Hz, 6H), 1.23-1.18 (m, 6H), 0.76 (t,  $J$  = 6.8 Hz, 3H); <sup>13</sup>C-NMR (100 MHz)  $\delta$  = 195.94, 150.16, 133.17, 128.95, 128.35, 55.01, 42.64, 36.04, 35.25, 31.61, 30.95, 28.86, 22.53, 18.48, 17.12, 14.03; MS calcd for C<sub>21</sub>H<sub>35</sub>NO (H<sup>+</sup>) 318.27, found 318.33.

**(3d) 1-(4-Hexylphenyl)-3-(pyrrolidin-1-yl)propan-1-one:** White solid, mp 121-123°C, yield 85%; <sup>1</sup>H-NMR (400 MHz)  $\delta$  = 7.72 (d,  $J$  = 8.4 Hz, 2H), 7.14 (d,  $J$  = 8.5 Hz, 2H), 3.75-3.71 (m, 2H), 3.46-3.38 (m, 4H), 2.79-2.75 (m, 2H), 2.54 (t,  $J$  = 7.6 Hz, 2H), 2.01-1.98 (m, 4H), 1.48-1.46 (m, 2H), 1.19-1.11 (m, 6H), 0.73 (t,  $J$  = 7.2 Hz, 3H); <sup>13</sup>C-NMR (100 MHz)  $\delta$  = 195.45, 150.26, 133.15, 128.99, 128.36, 54.40, 50.20, 36.06, 34.36, 31.63, 30.97, 28.88, 23.16, 22.55, 14.05; MS calcd for C<sub>19</sub>H<sub>29</sub>NO (H<sup>+</sup>) 287.22, found 287.28.

**(3e) 1-(4-Hexylphenyl)-3-morpholinopropan-1-one:** White solid, mp 152-154°C, yield 90%; <sup>1</sup>H-NMR (400 MHz)  $\delta$  = 7.71 (d,  $J$  = 8.4 Hz, 2H), 7.14 (d,  $J$  = 8.4 Hz, 2H), 3.88-3.78 (m, 4H), 3.44-3.37 (m, 6H), 2.84-2.81 (m, 2H), 2.52 (t,  $J$  = 7.6 Hz, 2H), 1.49-1.46 (m, 2H), 1.19-1.09 (m, 6H), 0.72 (t,  $J$  = 7.2 Hz, 3H); <sup>13</sup>C-NMR (100 MHz)  $\delta$  = 195.28, 162.34, 150.32, 133.05, 129.01, 128.35, 63.92, 52.49, 52.34, 36.05, 32.49, 31.69, 30.96, 28.87, 22.55, 14.05; MS calcd for C<sub>19</sub>H<sub>29</sub>NO<sub>3</sub> (H<sup>+</sup>) 319.21, found 319.19.

**(3f) Methyl 1-(3-(4-hexylphenyl)-3-oxopropyl)piperidine-4-carboxylate:** White solid, mp 147-149°C, yield 86%; <sup>1</sup>H-NMR (400 MHz)  $\delta$  = 7.73 (d,  $J$  = 8.3 Hz, 2H), 7.16 (d,  $J$  = 8.1 Hz, 2H), 3.64 (s, 1.5H), 3.59 (s, 1.5H), 3.44-3.38 (m, 6H), 2.91-2.84 (m, 1H), 2.79-2.72 (m, 0.5H), 2.65-2.57 (m, 1H), 2.54 (t,  $J$  = 7.8 Hz, 2H), 2.40-2.34 (m, 0.5H), 2.13-2.09 (m, 3H), 2.03-1.95 (m, 1H), 1.51-1.47 (m, 2H), 1.22-1.13 (m, 6H), 0.75 (t,  $J$  = 6.8 Hz, 3H); <sup>13</sup>C-NMR (100 MHz)  $\delta$  = 195.32, 161.93, 161.56, 150.19, 133.09, 128.97, 128.34, 52.82, 52.33, 51.76, 50.31, 38.93, 36.03, 34.85, 32.85, 31.61, 30.95, 28.86, 25.44, 24.06, 22.53, 14.03; MS calcd for C<sub>22</sub>H<sub>33</sub>NO<sub>3</sub> (H<sup>+</sup>) 359.25, found 291.21.

**(3g) 3-(Dibutylamino)-1-(4-hexylphenyl)propan-1-one:** White solid, mp 71-73°C, yield 90%; <sup>1</sup>H-NMR (400 MHz)  $\delta$  = 7.75 (d,  $J$  = 8.3 Hz, 2H), 7.16 (d,  $J$  = 8.3 Hz, 2H), 3.46-3.36 (m, 4H), 3.00-2.90 (m, 4H), 2.53 (t,  $J$  = 7.2 Hz, 2H), 1.60-1.47 (m, 6H), 1.29-1.12 (m, 10H), 0.86-0.82 (m, 6H), 0.75 (t,  $J$  = 7.2 Hz, 3H); <sup>13</sup>C-NMR (100 MHz)  $\delta$  = 195.67, 150.14, 133.27, 128.97, 128.37, 52.45, 48.42, 36.06, 33.18, 31.63, 30.98, 28.88, 24.89, 22.55, 20.01, 14.05, 13.54; MS calcd for C<sub>23</sub>H<sub>39</sub>NO (H<sup>+</sup>) 345.30, found 345.20.

**(3h) 3-(Dimethylamino)-1-(4-hexylphenyl)propan-1-one:** White solid, mp 142-144°C, yield 94%; <sup>1</sup>H-NMR (400 MHz)  $\delta$  = 7.85 (d,  $J$  = 8.3 Hz, 2H), 7.27 (d,  $J$  = 8.3 Hz, 2H), 3.52 (m, 4H), 2.86 (s, 6H), 2.64 (t,  $J$  = 7.6 Hz, 2H), 1.61-1.58 (m, 2H), 1.32-1.24 (m, 6H), 0.85 (t,  $J$  = 7.1 Hz, 3H); <sup>13</sup>C-NMR (100 MHz)  $\delta$  = 195.19, 162.09, 150.31, 133.11, 129.00, 128.36, 53.05, 43.58, 36.06, 33.43, 31.62, 30.97, 28.88, 22.62, 14.05; MS calcd for C<sub>17</sub>H<sub>27</sub>NO (H<sup>+</sup>) 261.21, found 261.20.

**(3i) 3-((Furan-2-ylmethyl)(methyl)amino)-1-(4-hexylphenyl)propan-1-one:** Pale brown waxy solid, yield 92%; <sup>1</sup>H-NMR (400 MHz)  $\delta$  = 7.74 (d,  $J$  = 8.3 Hz, 2H), 7.35 (d,  $J$  = 1.8 Hz, 1H), 7.16 (d,  $J$  = 8.3 Hz, 2H), 6.53 (d,  $J$  = 3.3 Hz, 1H), 6.34 (dd,  $J_1$  = 3.3 Hz,  $J_2$  = 1.8 Hz, 1H), 4.23 (s, 2H), 3.47-3.29 (m, 4H), 2.66 (s, 3H), 2.54 (t,  $J$  = 7.6 Hz, 2H), 1.51-1.47 (m, 2H), 1.21-1.12 (m, 6H), 0.75 (t,  $J$  = 7.1 Hz, 3H); <sup>13</sup>C-NMR (100 MHz)  $\delta$  = 195.27, 150.14, 145.09, 142.57, 133.21, 128.94, 128.32, 115.17, 111.44, 99.97, 51.36, 50.19, 39.99, 36.04, 33.29, 31.61, 30.96, 28.87, 22.54, 14.04; MS calcd for C<sub>21</sub>H<sub>29</sub>NO (H<sup>+</sup>) 327.23, found 327.22.

**(3j) 3-(Dicyclohexylamino)-1-(4-hexylphenyl)propan-1-one:** White waxy solid, yield 78%; <sup>1</sup>H-NMR (400 MHz)  $\delta$  = 7.79 (d,  $J$  = 8.2 Hz, 2H), 7.17 (d,  $J$  = 8.1 Hz, 2H), 5.03 (s (br), NH), 3.57-3.53 (m, 2H), 3.41-3.36 (m, 2H), 3.25-3.18 (m, 2H), 2.57 (t,  $J$  = 7.4 Hz, 2H), 2.08-2.05 (m, 2H), 1.94-1.91 (m, 2H), 1.83-1.80 (m, 4H), 1.62-1.40 (m, 8H), 1.26-1.05 (m, 12H), 0.76 (t,  $J$  = 6.8 Hz, 3H); <sup>13</sup>C-NMR (100 MHz)  $\delta$  = 196.18, 150.11, 133.23, 128.94, 128.37, 62.67, 43.71, 36.04, 35.41, 31.61, 30.96, 28.86, 28.27, 27.22, 25.21, 25.06, 24.91, 22.53, 14.04; MS calcd for C<sub>27</sub>H<sub>43</sub>NO (H<sup>+</sup>) 398.33, found 398.63

**(3k) 1-(4-hexylphenyl)-3-(propylamino)propan-1-one:** White waxy solid, yield 93%; <sup>1</sup>H-NMR (400 MHz)  $\delta$  = 7.72 (d,  $J$  = 8.2 Hz, 2H), 7.15 (d,  $J$  = 8.3 Hz, 2H), 3.39-3.29 (m, 4H), 2.92-2.91 (m, 2H), 2.54 (t,  $J$  = 7.6 Hz, 2H), 1.71-1.65 (m, 2H), 1.51-1.48 (m, 2H), 1.22-1.14 (m, 6H), 0.91 (t,  $J$  = 7.3 Hz, 3H), 0.75 (t,  $J$  = 7.4 Hz, 3H); <sup>13</sup>C-NMR (100 MHz)  $\delta$  = 198.29, 150.45, 133.05, 128.94, 128.35, 49.91, 43.38, 36.06, 33.081, 31.61, 30.93, 28.87, 22.54, 19.64, 14.04, 10.88; MS calcd for C<sub>18</sub>H<sub>29</sub>NO (H<sup>+</sup>) 275.22, found 275.29.

**General procedure for 1, 4a and 4g:** see general procedure for 3a-k.

**(1) 1-(4-hexylphenyl)prop-2-en-1-one:** Colorless liquid, yield 55%; <sup>1</sup>H-NMR (400 MHz)  $\delta$  = 7.88 (d,  $J$  = 8.2 Hz, 2H), 7.28 (d,  $J$  = 8.2 Hz, 2H), 7.17 (dd,  $J$  = 17.1 Hz,  $J$  = 10.5 Hz, 1H), 6.43 (dd,  $J$  = 17.1 Hz,  $J$  = 1.6 Hz, 1H), 5.90 (dd,  $J$  = 10.5 Hz,  $J$  = 1.6 Hz, 1H), 2.67 (t,  $J$  = 7.8 Hz, 2H), 1.63 (p,  $J$  = 7.1 Hz, 2H), 1.36-1.27 (m, 6H), 0.88 (t,  $J$  = 6.8 Hz, 3H); <sup>13</sup>C-NMR (100 MHz)  $\delta$  = 190.55, 148.82, 134.94, 132.41, 129.62, 128.86, 128.67, 36.02, 31.65, 31.06, 28.92, 22.56, 14.05; MS calcd for C<sub>15</sub>H<sub>20</sub>O (H<sup>+</sup>) 216.15, found .

**(4a) (E)-4-(4-hexylphenyl)-4-oxobut-2-enoic acid:** Yellow solid, mp 90-92°C, yield 45%; (DMSO) <sup>1</sup>H-NMR (400 MHz)  $\delta$  = 7.95 (d,  $J$  = 8.1 Hz, 2H), 7.87 (d,  $J$  = 15.5 Hz, 1H), 7.39 (d,  $J$  = 8.1 Hz, 2H), 6.66 (d,  $J$  = 15.5 Hz, 1H), 2.66 (t,  $J$  = 7.6 Hz, 2H), 1.59 (p,  $J$  = 7.7 Hz, 2H), 1.36-1.20 (m, 6H), 0.85 (t,  $J$  = 6.9 Hz, 3H); <sup>13</sup>C-NMR (100 MHz)  $\delta$  = 188.78, 166.23, 149.27, 136.19, 133.85, 132.50, 128.88, 35.07, 30.95, 30.39, 28.20, 21.93, 13.84 MS calcd for C<sub>16</sub>H<sub>20</sub>O<sub>3</sub> (H<sup>+</sup>) 261.14, found 261.33.

**(4g) 1-(4-hexylphenyl)propan-1-one:** Colorless liquid, yield 95%; <sup>1</sup>H-NMR (400 MHz)  $\delta$  = 7.88 (d,  $J$  = 8.1 Hz, 2H), 7.25 (d,  $J$  = 8.0 Hz, 2H), 2.97 (q,  $J$  = 7.2 Hz, 2H), 2.65 (t,  $J$  = 7.6 Hz, 2H), 1.62 (p,  $J$  = 7.5 Hz, 2H), 1.35-1.26 (m, 6H), 1.21 (t,  $J$  = 7.6 Hz, 3H), 0.88 (t,  $J$  = 6.8 Hz, 3H); <sup>13</sup>C-NMR (100 MHz)  $\delta$  = 200.53, 148.52, 134.63, 128.55, 128.09, 35.96, 31.64, 31.08, 28.91, 22.55, 14.05, 8.33; MS calcd for C<sub>15</sub>H<sub>22</sub>O (H<sup>+</sup>) 218.17, found 218.19.

**General procedure for 5b-f:** To a solution of 1-bromo-4-heptylbenzene (408  $\mu$ L, 2 mmol) in THF (3 mL) was added n-BuLi (2M in pentane, 1.1 mL, 1.1 equiv.) at -78°C. After stirring for 20 min, aldehyde (2 mmol, 1 equiv.) was added and the solution was stirred for an additional 2 h at -78°C. The reaction mixture was quenched at -78°C with NH<sub>4</sub>Cl (aq) (2 mL) and allowed to warm to room temperature. The organic layer was separated. The aqueous layer was extracted with ethyl acetate (3 mL, twice) and the combined organic layers were dried over MgSO<sub>4</sub>, filtered, and concentrated *in vacuo*. Purification was done by flash column chromatography (SP1, 25M (SiO<sub>2</sub>), flow rate: 25 mL/min; gradient: 1% to 30% ethyl acetate in hexanes over 20 CV).

**(5b) (E)-1-(4-heptylphenyl)but-2-en-1-ol:** Colorless liquid, yield 51%; <sup>1</sup>H-NMR (400 MHz)  $\delta$  = 7.28 (d,  $J$  = 7.9 Hz, 2H), 7.17 (d,  $J$  = 8.1 Hz, 2H), 5.82-5.66 (m, 2H), 5.15-5.11 (m, 1H), 2.60 (t,  $J$  =

7.5 Hz, 2H), 1.95 (m, 1H (OH)), 1.71 (m, 3H), 1.62 (m, 2H), 1.36-1.27 (m, 8H), 0.90 (t,  $J = 6.9$  Hz, 3H);  $^{13}\text{C-NMR}$  (100 MHz)  $\delta = 142.25, 140.61, 133.68, 128.46, 127.07, 126.02, 75.04, 35.61, 31.79, 31.48, 29.27, 29.15, 22.64, 17.66, 14.07$ , MS calcd for  $\text{C}_{17}\text{H}_{26}\text{O}(\text{H}^+)$  247.20, found 228.80 (-OH).

**(5c) 1-(4-heptylphenyl)-3-methylbut-2-en-1-ol:** Colorless liquid, yield 67%;  $^1\text{H-NMR}$  (400 MHz)  $\delta = 7.29$  (d,  $J = 8.1$  Hz, 2H), 7.16 (d,  $J = 7.9$  Hz, 2H), 5.43 (m, 2H), 2.59 (t,  $J = 7.5$  Hz, 2H), 1.80 (s, 3H), 1.75 (m, 3H), 1.71 (m, 1H (OH)), 1.60 (m, 2H), 1.34-1.25 (m, 8H), 0.88 (t,  $J = 7.0$  Hz, 3H);  $^{13}\text{C-NMR}$  (100 MHz)  $\delta = 142.02, 141.46, 134.89, 128/47, 127.77, 125.48, 70.63, 35.61, 31.79, 31.49, 29.28, 29.15, 25.85, 22.64, 18.24, 14.06$ ; MS calcd for  $\text{C}_{18}\text{H}_{28}\text{O}(\text{H}^+)$  261.21, found 244.19 (-OH).

**(5d) 1-(4-heptylphenyl)-2-methylprop-2-en-1-ol:** Colorless liquid, yield 46%;  $^1\text{H-NMR}$  (400 MHz)  $\delta = 7.27$  (d,  $J = 7.9$  Hz, 2H), 7.16 (d,  $J = 7.9$  Hz, 2H), 5.21 (m, 1H), 5.11 m, 1H), 4.95 (m, 1H), 2.59 (t,  $J = 7.9$  Hz, 2H), 1.91 (m, 1H (OH)), 1.66 (m, 4H), 1.34-1.26 (m, 8H), 0.88 (t,  $J = 6.9$  Hz, 3H);  $^{13}\text{C-NMR}$  (100 MHz)  $\delta = 146.91, 142.46, 139.19, 128.42, 126.38, 110.78, 77.70, 35.64, 31.80, 31.47, 29.28, 29.16, 22.65, 18.41, 14.08$ , MS calcd for  $\text{C}_{17}\text{H}_{26}\text{O}(\text{H}^+)$  247.20, found 228.80 (-OH).

**(5e) (E)-1-(4-heptylphenyl)-2-methylbut-2-en-1-ol:** Colorless liquid, yield 67%;  $^1\text{H-NMR}$  (400 MHz)  $\delta = 7.26$  (d,  $J = 7.9$  Hz, 2H), 7.15 (d,  $J = 8.0$  Hz, 2H), 5.71 (q,  $J = 6.7$  Hz, 1H), 5.10 (d,  $J = 3.0$  Hz, 1H), 2.56 (t,  $J = 6.7$  Hz, 2H), 1.82 (m, 1H (OH)), 1.66 (d,  $J = 6.7$  Hz, 3H), 1.60 (m, 2H), 1.50 (s, 3H), 1.34-1.25 (m, 8H), 0.88 (t,  $J = 6.9$  Hz, 3H);  $^{13}\text{C-NMR}$  (100 MHz)  $\delta = 141.97, 139.74, 137.64, 128.23, 126.11, 120.85, 79.19, 35.63, 31.80, 31.48, 29.30, 29.17, 22.65, 14.08, 13.14, 11.81$ , MS calcd for  $\text{C}_{18}\text{H}_{28}\text{O}(\text{H}^+)$  261.21, found 244.19 (-OH).

**(5f) (E)-1-(4-heptylphenyl)-3-phenylprop-2-en-1-ol:** White solid, mp 32-34°C, yield 54%;  $^1\text{H-NMR}$  (400 MHz)  $\delta = 7.35$ -7.12 (m, 9H), 6.60 (d,  $J = 15.8$  Hz, 1H), 6.32 (dd,  $J = 15.8$  Hz,  $J = 6.4$  Hz, 1H), 5.27 (dd,  $J = 6.4$  Hz,  $J = 3.0$  Hz, 1H), 2.55 (t,  $J = 7.9$  Hz, 2H), 2.20 (d,  $J = 3.0$  Hz, 1H(OH)), 1.56 (p,  $J = 7.5$  Hz, 2H), 1.34-1.26 (m, 8H), 0.81 (t,  $J = 6.9$  Hz, 3H);  $^{13}\text{C-NMR}$  (100 MHz)  $\delta = 142.55, 139.99, 136.58, 131.63, 130.17, 128.99, 128.47, 127.62, 126.54, 126.27, 74.90, 35.61, 31.77, 31.46, 29.24, 24.14, 22.63, 14.07$ , MS calcd for  $\text{C}_{22}\text{H}_{28}\text{O}(\text{H}^+)$  309.21, found 291.19 (-OH).

**General procedure for 4b-f:** To a solution of alcohol (0.36 mmol), 4-methylmorpholine N-oxide (65 mg, 0.54 mmol, 1.5 equiv.), molecular sieves (200 mg) in acetonitrile (3 mL) was added tetrapropylammonium perruthenate (6.5 mg, 0.018 mmol, 0.05 equiv). The reaction mixture was stirred for 1–4 h, absorbed onto silica gel and purified by column chromatography (SP1, 25M (SiO<sub>2</sub>), flow rate: 25 mL/min; gradient: 1–10% ethyl acetate in hexanes over 18 CV).

**(4b) (E)-1-(4-heptylphenyl)but-2-en-1-one:** Colorless liquid, yield 67%;  $^1\text{H-NMR}$  (400 MHz)  $\delta = 7.85$  (d,  $J = 8.3$  Hz, 2H), 7.26 (d,  $J = 8.4$  Hz, 2H), 7.06 (m, 1H), 6.91 (m, 1H), 2.65 (t,  $J = 8.0$  Hz, 2H), 1.99 (d,  $J = 6.8$  Hz, 3H), 1.62 (m, 2H), 1.34-1.24 (m, 8H), 0.87 (t,  $J = 7.0$  Hz, 3H);  $^{13}\text{C-NMR}$  (100 MHz)  $\delta = 190.30, 148.35, 144.42, 135.50, 128.65, 128.55, 127.48, 35.99, 31.76, 31.14, 29.22, 29.12, 22.63, 18.57, 14.7$ ; MS calcd for  $\text{C}_{17}\text{H}_{24}\text{O}(\text{H}^+)$  245.77, found 245.77.

**(4c) 1-(4-hexylphenyl)-2-methylprop-2-en-1-one:** Colorless liquid, yield 46%;  $^1\text{H-NMR}$  (400 MHz)  $\delta = 7.68$  (d,  $J = 8.0$  Hz, 2H), 7.23 (d,  $J = 7.9$  Hz, 2H), 5.86 (m, 1H), 5.60 (m, 1H), 2.65 (t,  $J = 7.9$  Hz, 2H), 2.07 (s, 3H), 1.67 (m, 2H), 1.37-1.24 (m, 8H), 0.88 (t,  $J = 6.9$  Hz, 3H);  $^{13}\text{C-NMR}$  (100 MHz)  $\delta = 198.14, 147.76, 143.85, 135.05, 129.66, 128.19, 126.06, 35.95, 31.77, 31.16, 29.23, 29.12, 22.64, 18.83, 14.08$ , MS calcd for  $\text{C}_{17}\text{H}_{24}\text{O}(\text{H}^+)$  245.77, found 245.18.

**(4d) 1-(4-heptylphenyl)-3-methylbut-2-en-1-one:** Colorless liquid, yield 67%;  $^1\text{H-NMR}$  (400 MHz)  $\delta = 7.85$  (d,  $J = 8.1$  Hz, 2H), 7.24 (d,  $J = 8.1$  Hz, 2H), 6.74 (s, 1H), 2.65 (t,  $J = 7.9$  Hz, 2H), 2.20 (s, 3H), 2.01 (s, 3H), 1.62 (d,  $J = 7.6$  Hz, 3H), 1.35-1.23 (m, 8H), 0.88 (t,  $J = 6.8$  Hz, 3H);  $^{13}\text{C-NMR}$  (100 MHz)  $\delta = 191.25, 155.80, 147.89, 136.86, 128.44, 128.30, 121.29, 35.94, 31.76, 31.15, 29.20, 29.11, 27.90, 22.62, 21.07, 14.06$ ; MS calcd for  $\text{C}_{18}\text{H}_{26}\text{O}(\text{H}^+)$  259.20, found 259.76.

**(4e) (E)-1-(4-heptylphenyl)-2-methylbut-2-en-1-one:** Colorless liquid, yield 67%;  $^1\text{H-NMR}$  (400 MHz)  $\delta = 7.55$  (d,  $J = 7.9$  Hz, 2H), 7.21 (d,  $J = 7.9$  Hz, 2H), 6.38 (q,  $J = 6.7$  Hz, 1H), 2.64 (t,  $J = 7.3$

Hz, 2H), 1.96 (s, 3H), 1.87 (d,  $J = 6.9$  Hz, 3H), 1.62 (p,  $J = 7.3$  Hz, 2H), 1.36-1.21 (m, 8H), 0.88 (t,  $J = 6.8$  Hz, 3H);  $^{13}\text{C-NMR}$  (100 MHz)  $\delta = 198.77, 146.85, 140.42, 137.60, 136.12, 129.45, 128.03, 35.91, 31.78, 31.22, 29.23, 29.13, 22.64, 14.65, 14.08, 12.32$ , MS calcd for  $\text{C}_{18}\text{H}_{26}\text{O}(\text{H}^+)$  259.20, found 259.76.

**(4f) (E)-1-(4-heptylphenyl)-3-phenylprop-2-en-1-one:** Pale yellow solid, mp 58-60°C, yield 54%;  $^1\text{H-NMR}$  (400 MHz)  $\delta = 7.96$  (d,  $J = 8.1$  Hz, 2H), 7.81 (d,  $J = 15.7$  Hz, 1H), 7.64 (m, 2H), 7.53 (d,  $J = 15.7$  Hz, 1H), 7.43 (m, 3H), 7.31 (d,  $J = 8.0$  Hz, 2H), 2.69 (t,  $J = 7.9$  Hz, 2H), 1.65 (p,  $J = 7.4$  Hz, 2H), 1.35-1.26 (m, 8H), 0.88 (t,  $J = 6.8$  Hz, 3H);  $^{13}\text{C-NMR}$  (100 MHz)  $\delta = 190.06, 148.61, 144.34, 135.82, 135.02, 130.39, 128.92, 128.68, 128.65, 128.39, 122.15, 36.04, 31.77, 31.15, 29.23, 29.12, 22.64, 14.08$ ; MS calcd for  $\text{C}_{22}\text{H}_{26}\text{O}(\text{H}^+)$  307.20, found 307.72.

**General procedure for 6a-m:** A solution of triethylamine (83  $\mu\text{L}$ , 0.6 mmol, 1.1 equiv) and alcohol (0.5 mmol) in DCM (2 mL) was treated with acryloyl chloride (49  $\mu\text{L}$ , 0.6 mmol, 1.1 equiv.) and stirred for 1 h at rt. The reaction mixture absorbed on silica cartridge and purified by flash column chromatography (SP1, 25S ( $\text{SiO}_2$ ), flow rate: 25 mL/min; gradient: 1% to 20% ethyl acetate in hexanes over 20 CV).

**(6a) 4-propylphenyl acrylate:** Colorless liquid, yield 85%;  $^1\text{H-NMR}$  (400 MHz)  $\delta = 7.18$  (d,  $J = 8.6$  Hz, 2H), 7.03 (d,  $J = 8.5$  Hz, 2H), 6.59 (dd,  $J = 17.3$  Hz,  $J = 1.3$  Hz, 1H), 6.31 (dd,  $J = 17.3$  Hz,  $J = 10.4$  Hz, 1H), 6.00 (dd,  $J = 10.4$  Hz,  $J = 1.3$  Hz, 1H), 2.58 (t,  $J = 7.4$  Hz, 2H), 1.64 (h,  $J = 7.4$  Hz, 2H), 0.94 (t,  $J = 7.3$  Hz, 3H);  $^{13}\text{C-NMR}$  (100 MHz)  $\delta = 164.71, 148.51, 140.26, 132.26, 129.31, 128.08, 121.10, 39.44, 24.51, 13.78$ ; MS calcd for  $\text{C}_{12}\text{H}_{14}\text{O}_2(\text{H}^+)$  191.10, found 191.37.

**(6b) 4-butylphenyl acrylate:** Colorless liquid, yield 86%;  $^1\text{H-NMR}$  (400 MHz)  $\delta = 7.18$  (d,  $J = 8.6$  Hz, 2H), 7.03 (d,  $J = 8.5$  Hz, 2H), 6.59 (dd,  $J = 17.3$  Hz,  $J = 1.3$  Hz, 1H), 6.31 (dd,  $J = 17.3$  Hz,  $J = 10.4$  Hz, 1H), 6.00 (dd,  $J = 10.4$  Hz,  $J = 1.3$  Hz, 1H), 2.61 (t,  $J = 7.6$  Hz, 2H), 1.60 (p,  $J = 7.6$  Hz, 2H), 1.34 (h,  $J = 7.7$  Hz, 2H), 0.93 (t,  $J = 7.3$  Hz, 3H);  $^{13}\text{C-NMR}$  (100 MHz)  $\delta = 164.71, 148.46, 140.48, 132.26, 129.26, 128.08, 121.10, 35.03, 33.57, 22.30, 13.91$ ; MS calcd for  $\text{C}_{13}\text{H}_{16}\text{O}_2(\text{H}^+)$  205.11, found 205.12.

**(6c) 4-pentylphenyl acrylate:** Colorless liquid, yield 88%;  $^1\text{H-NMR}$  (400 MHz)  $\delta = 7.18$  (d,  $J = 8.5$  Hz, 2H), 7.02 (d,  $J = 8.5$  Hz, 2H), 6.58 (dd,  $J = 17.3$  Hz,  $J = 1.3$  Hz, 1H), 6.31 (dd,  $J = 17.3$  Hz,  $J = 10.4$  Hz, 1H), 5.99 (dd,  $J = 10.4$  Hz,  $J = 1.3$  Hz, 1H), 2.59 (t,  $J = 7.9$  Hz, 2H), 1.61 (p,  $J = 7.4$  Hz, 2H), 1.35-1.28 (m, 4H), 0.89 (t,  $J = 7.0$  Hz, 3H);  $^{13}\text{C-NMR}$  (100 MHz)  $\delta = 164.71, 148.47, 140.52, 132.26, 129.26, 128.08, 121.10, 35.32, 31.45, 31.11, 22.51, 14.00$ ; MS calcd for  $\text{C}_{14}\text{H}_{18}\text{O}_2(\text{H}^+)$  219.30, found 220.10.

**(6d) 4-tert-pentylphenyl acrylate:** Colorless liquid, yield 94%;  $^1\text{H-NMR}$  (400 MHz)  $\delta = 7.34$  (d,  $J = 8.6$  Hz, 2H), 7.06 (d,  $J = 8.6$  Hz, 2H), 6.60 (dd,  $J = 17.3$  Hz,  $J = 1.3$  Hz, 1H), 6.32 (dd,  $J = 17.3$  Hz,  $J = 10.4$  Hz, 1H), 6.00 (dd,  $J = 10.4$  Hz,  $J = 1.3$  Hz, 1H), 1.64 (q,  $J = 7.4$  Hz, 2H), 1.28 (m, 6H), 0.69 (t,  $J = 7.4$  Hz, 3H);  $^{13}\text{C-NMR}$  (100 MHz)  $\delta = 164.66, 148.18, 147.03, 132.24, 128.12, 126.94, 120.70, 37.71, 36.90, 28.48, 9.09$ ; MS calcd for  $\text{C}_{14}\text{H}_{18}\text{O}_2(\text{H}^+)$  219.30, found 219.78.

**(6e) 4-hexylphenyl acrylate:** Colorless liquid, yield 89%;  $^1\text{H-NMR}$  (400 MHz)  $\delta = 7.19$  (d,  $J = 8.5$  Hz, 2H), 7.03 (d,  $J = 8.5$  Hz, 2H), 6.60 (dd,  $J = 17.3$  Hz,  $J = 1.3$  Hz, 1H), 6.31 (dd,  $J = 17.3$  Hz,  $J = 10.4$  Hz, 1H), 5.99 (dd,  $J = 10.4$  Hz,  $J = 1.3$  Hz, 1H), 2.60 (t,  $J = 7.8$  Hz, 2H), 1.61 (p,  $J = 7.7$  Hz, 2H), 1.34-1.26 (m, 6H), 0.89 (t,  $J = 7.1$  Hz, 3H);  $^{13}\text{C-NMR}$  (100 MHz)  $\delta = 164.71, 148.46, 140.53, 132.26, 129.25, 128.08, 121.10, 35.36, 31.70, 31.40, 28.94, 22.59, 14.02$ ; MS calcd for  $\text{C}_{15}\text{H}_{20}\text{O}_2(\text{Na}^+)$  255.31, found 255.75.

**(6f) 4-heptylphenyl acrylate:** Colorless liquid, yield 76%;  $^1\text{H-NMR}$  (400 MHz)  $\delta = 7.19$  (d,  $J = 8.3$  Hz, 2H), 7.03 (d,  $J = 8.3$  Hz, 2H), 6.59 (dd,  $J = 17.3$  Hz,  $J = 1.3$  Hz, 1H), 6.31 (dd,  $J = 17.3$  Hz,  $J = 10.4$  Hz, 1H), 5.99 (dd,  $J = 10.4$  Hz,  $J = 1.3$  Hz, 1H), 2.60 (t,  $J = 7.8$  Hz, 2H), 1.61 (p,  $J = 7.7$  Hz, 2H), 1.35-1.26 (m, 8H), 0.89 (t,  $J = 6.9$  Hz, 3H);  $^{13}\text{C-NMR}$  (100 MHz)  $\delta = 164.71, 148.46, 140.53, 132.26, 129.25, 128.08, 121.10, 35.36, 31.80, 31.45, 29.24, 29.15, 22.65, 14.08$ ; MS calcd for  $\text{C}_{16}\text{H}_{22}\text{O}_2(\text{H}^+)$  247.16, found 248.80.

**(6g) 4-octylphenyl acrylate:** Colorless liquid, yield 81%;  $^1\text{H-NMR}$  (400 MHz)  $\delta = 7.19$  (d,  $J = 8.2$  Hz, 2H), 7.03 (d,  $J = 8.2$  Hz, 2H), 6.59 (dd,  $J = 17.3$  Hz,  $J = 1.3$  Hz, 1H), 6.31 (dd,  $J = 17.3$  Hz,  $J = 10.4$  Hz, 1H), 5.99 (dd,  $J = 10.4$  Hz,  $J = 1.3$  Hz, 1H), 2.60 (t,  $J = 7.8$  Hz, 2H), 1.61 (p,  $J = 7.7$  Hz, 2H), 1.35-1.26 (m, 10H), 0.89 (t,  $J = 6.9$  Hz, 3H);  $^{13}\text{C-NMR}$  (100 MHz)  $\delta = 164.71, 148.46, 140.53, 132.25, 129.25, 128.08, 121.10, 35.36, 31.87, 31.45, 29.45, 29.28, 28.24, 22.66, 14.08$ ; MS calcd for  $\text{C}_{17}\text{H}_{24}\text{O}_2$  ( $\text{H}^+$ ) 261.18, found 262.80.

**(6h) (trans)-4-tert-pentylcyclohexyl acrylate:** Colorless liquid, yield 62%;  $^1\text{H-NMR}$  (400 MHz)  $\delta = 6.38$  (dd,  $J = 17.3$  Hz,  $J = 1.5$  Hz, 1H), 6.09 (dd,  $J = 17.3$  Hz,  $J = 10.4$  Hz, 1H), 5.78 (dd,  $J = 10.4$  Hz,  $J = 1.5$  Hz, 1H), 4.71 (m, 1H), 2.05 (m, 2H), 1.77 (m, 2H), 1.40-1.22 (m, 4H), 1.20-1.09 (m, 3H), 0.79 (t,  $J = 6.8$  Hz, 3H);  $^{13}\text{C-NMR}$  (100 MHz)  $\delta = 165.81, 130.06, 129.15, 73.89, 44.35, 34.59, 32.74, 32.18, 25.00, 24.28, 8.08$ ; MS calcd for  $\text{C}_{14}\text{H}_{24}\text{O}_2$  ( $\text{H}^+$ ) 225.18, found .

**(6i) Propyl 4-(acryloyloxy)benzoate:** Colorless liquid, yield 85%;  $^1\text{H-NMR}$  (400 MHz)  $\delta = 8.10$  (d,  $J = 8.9$  Hz, 2H), 7.22 (d,  $J = 8.9$  Hz, 2H), 6.63 (dd,  $J = 17.3$  Hz,  $J = 1.3$  Hz, 1H), 6.33 (dd,  $J = 17.3$  Hz,  $J = 10.4$  Hz, 1H), 6.05 (dd,  $J = 10.4$  Hz,  $J = 1.3$  Hz, 1H), 4.28 (t,  $J = 6.6$  Hz, 2H), 1.79 (h,  $J = 7.4$  Hz, 2H), 1.03 (t,  $J = 7.4$  Hz, 3H);  $^{13}\text{C-NMR}$  (100 MHz)  $\delta = 165.85, 163.93, 154.13, 133.13, 131.11, 128.14, 127.60, 121.49, 66.65, 22.10, 10.49$ ; MS calcd for  $\text{C}_{13}\text{H}_{14}\text{O}_4$  ( $\text{H}^+$ ) 235.09, found 235.71.

**(6j) Pentyl 4-(acryloyloxy)benzoate:** White solid, mp 33-35°C, yield 75%;  $^1\text{H-NMR}$  (400 MHz)  $\delta = 8.09$  (d,  $J = 8.8$  Hz, 2H), 7.22 (d,  $J = 8.8$  Hz, 2H), 6.63 (dd,  $J = 17.3$  Hz,  $J = 1.3$  Hz, 1H), 6.33 (dd,  $J = 17.3$  Hz,  $J = 10.4$  Hz, 1H), 6.05 (dd,  $J = 10.4$  Hz,  $J = 1.3$  Hz, 1H), 4.32 (t,  $J = 6.6$  Hz, 2H), 1.77 (p,  $J = 7.2$  Hz, 2H), 1.46-1.36 (m, 4H), 0.93 (t,  $J = 7.1$  Hz, 3H);  $^{13}\text{C-NMR}$  (100 MHz)  $\delta = 165.85, 163.92, 154.12, 133.12, 131.10, 128.15, 127.60, 121.49, 66.24, 28.41, 28.17, 22.34, 13.96$ ; MS calcd for  $\text{C}_{15}\text{H}_{18}\text{O}_4$  ( $\text{H}^+$ ) 263.12, found 263.78.

**(6k) 4-butyramidophenyl acrylate:** White solid, mp 87-89°C, yield 73%;  $^1\text{H-NMR}$  (400 MHz)  $\delta = 7.51$  (d,  $J = 8.8$  Hz, 2H), 7.34 (s, br (NH)), 7.06 (d,  $J = 8.8$  Hz, 2H), 6.59 (dd,  $J = 17.3$  Hz,  $J = 1.3$  Hz, 1H), 6.31 (dd,  $J = 17.3$  Hz,  $J = 10.4$  Hz, 1H), 6.01 (dd,  $J = 10.4$  Hz,  $J = 1.3$  Hz, 1H), 2.31 (t,  $J = 7.6$  Hz, 2H), 1.75 (h,  $J = 7.4$  Hz, 2H), 0.99 (t,  $J = 7.4$  Hz, 3H);  $^{13}\text{C-NMR}$  (100 MHz)  $\delta = 171.22, 164.72, 146.57, 135.73, 132.61, 127.85, 121.86, 120.73, 39.55, 19.02, 13.72$ ; MS calcd for  $\text{C}_{13}\text{H}_{15}\text{NO}_3$  ( $\text{H}^+$ ) 235.23, found 234.11.

**(6l) Hexyl 2-(acryloyloxy)benzoate:** Colorless liquid, yield 71%;  $^1\text{H-NMR}$  (400 MHz)  $\delta = 8.03$  (d,  $J = 7.9$  Hz, 1H), 7.57 (t,  $J = 7.8$  Hz, 1H), 7.33 (t,  $J = 7.9$  Hz, 1H), 7.14 (d,  $J = 7.8$  Hz, 1H), 6.64 (dd,  $J = 17.3$  Hz,  $J = 1.3$  Hz, 1H), 6.39 (dd,  $J = 17.3$  Hz,  $J = 10.4$  Hz, 1H), 6.05 (dd,  $J = 10.4$  Hz,  $J = 1.3$  Hz, 1H), 4.24 (t,  $J = 6.8$  Hz, 2H), 1.69 (p,  $J = 7.0$  Hz, 2H), 1.42-1.28 (m, 6H), 0.89 (t,  $J = 6.7$  Hz, 3H);  $^{13}\text{C-NMR}$  (100 MHz)  $\delta = 164.68, 164.50, 150.28, 133.61, 132.67, 131.82, 127.79, 126.05, 123.83, 123.74, 65.40, 31.43, 28.55, 25.60, 22.51, 13.98$ ; MS calcd for  $\text{C}_{16}\text{H}_{20}\text{O}_4$  ( $\text{H}^+$ ) 277.14, found 277.81.

**(6m) 5,6,7,8-tetrahydronaphthalen-2-yl acrylate:** Colorless liquid, yield 77%;  $^1\text{H-NMR}$  (400 MHz)  $\delta = 7.07$  (d,  $J = 7.7$  Hz, 1H), 6.84 (m, 2H), 6.84 (dd,  $J = 17.3$  Hz,  $J = 1.5$  Hz, 1H), 6.31 (dd,  $J = 17.3$  Hz,  $J = 10.4$  Hz, 1H), 5.99 (dd,  $J = 10.4$  Hz,  $J = 1.5$  Hz, 1H), 2.77 (m, 2H), 1.79 (m, 2H);  $^{13}\text{C-NMR}$  (100 MHz)  $\delta = 164.87, 148.12, 138.43, 134.75, 132.16, 129.92, 128.11, 121.54, 118.50, 29.42, 28.88, 23.09, 22.86$ ; MS calcd for  $\text{C}_{13}\text{H}_{14}\text{O}_2$  ( $\text{H}^+$ ) 203.10, found 203.31.

**General procedure for 7a-g:** To a solution of 4-hexylaniline (216  $\mu\text{L}$ , 1 mmol), triethylamine (209  $\mu\text{L}$ , 1.5 mmol, 1.5 equiv.) in DCM (5 mL) was added acid chloride (1.1 mmol) or acid anhydride (1 mmol). The reaction mixture was stirred for 1 h, poured into  $\text{NH}_4\text{Cl}$  (aq) (10 mL), diluted with ethyl acetate (10 mL), and the organic layer was separated. The aqueous layer was extracted with ethyl acetate (10 mL, twice) and the combined organic layers were dried over  $\text{MgSO}_4$ , filtered, and concentrated *in vacuo*. Purification was done by flash column chromatography (SP1, 25M ( $\text{SiO}_2$ ), flow rate: 25 mL/min; gradient: 1–30% ethyl acetate in hexanes over 20 CV).

**(7a) N-(4-hexylphenyl)acrylamide:** White solid, mp 91-93°C, yield 88%; <sup>1</sup>H-NMR (400 MHz)  $\delta$  = 7.37 (d,  $J$  = 8.1 Hz, 2H), 7.30 (s, NH), 7.02 (d,  $J$  = 8.1 Hz, 2H), 6.30 (dd,  $J$  = 16.8 Hz,  $J$  = 1.2 Hz, 1H), 6.13 (dd,  $J$  = 16.8 Hz,  $J$  = 10.4 Hz, 1H), 5.62 (dd,  $J$  = 10.6 Hz,  $J$  = 1.2 Hz, 1H), 2.46 (t,  $J$  = 7.6 Hz, 2H), 1.47 (p,  $J$  = 7.1 Hz, 2H), 1.22-1.16 (m, 6H), 0.76 (t,  $J$  = 6.8 Hz, 3H); <sup>13</sup>C-NMR (100 MHz)  $\delta$  = 163.44, 139.31, 135.30, 131.26, 128.86, 127.44, 120.00, 35.36, 31.69, 31.42, 28.89, 22.58, 14.06 MS calcd for C<sub>15</sub>H<sub>21</sub>NO (H<sup>+</sup>) 231.33, found 231.16.

**(7b) (Z)-4-(4-hexylphenylamino)-4-oxobut-2-enoic acid:** Yellow solid, mp 143-145°C, yield 85%; (DMSO-d<sub>6</sub>) <sup>1</sup>H-NMR (400 MHz)  $\delta$  = 13.3 (s, br, OH), 10.4 (s, br, NH), 7.56 (d,  $J$  = 8.3 Hz, 2H), 7.17 (d,  $J$  = 8.3 Hz, 2H), 6.49 (d,  $J$  = 12.0, 1H), 6.32 (d,  $J$  = 12.0 Hz, 1H), 2.56 (t,  $J$  = 7.5 Hz, 2H), 1.57 (p,  $J$  = 7.1 Hz, 2H), 1.32-1.26 (m, 6H), 0.88 (t,  $J$  = 6.7 Hz, 3H); <sup>13</sup>C-NMR (100 MHz)  $\delta$  = 166.65, 162.93, 137.94, 136.00, 131.56, 130.56, 128.43, 119.49, 34.49, 31.01, 30.86, 28.17, 21.96, 13.85 MS calcd for C<sub>16</sub>H<sub>21</sub>NO<sub>3</sub> (H<sup>+</sup>) 276.15, found 276.87.

**(7c) (E)-N-(4-hexylphenyl)but-2-enamide:** White solid, mp 81-84°C, yield 78 %; <sup>1</sup>H-NMR (400 MHz)  $\delta$  = 7.45-7.37 (m, 2H), 7.13 (d,  $J$  = 8.3 Hz, 2H), 7.05 (s, NH), 6.96 (m, 1H), 5.93 (d,  $J$  = 15.0 Hz, 1H), 2.56 (t,  $J$  = 7.8 Hz, 2H), 1.90 (s, 3H), 1.58 (m, 2H), 1.36-1.28 (m, 6H), 0.87 (t,  $J$  = 6.6 Hz, 3H); <sup>13</sup>C-NMR (100 MHz)  $\delta$  = 163.97, 141.08, 138.93, 135.62, 128.79, 125.53, 119.97, 35.35, 31.43, 28.89, 22.57, 17.77, 14.05; MS calcd for H<sub>16</sub>C<sub>23</sub>NO (H<sup>+</sup>) 246.18, found 246.0.

**(7d) N-(4-hexylphenyl)-3-methylbut-2-enamide:** White solid, mp 67-69°C, yield 84 %; <sup>1</sup>H-NMR (400 MHz)  $\delta$  = 7.42 (d,  $J$  = 8.3 Hz, 2H), 7.11 (d,  $J$  = 8.3 Hz, 2H), 7.06 (s, NH), 5.96 (m, 1H), 2.55 (t,  $J$  = 7.8 Hz, 2H), 2.21 (s, 3H), 1.89 (s, 3H), 1.57 (p,  $J$  = 8.1 Hz, 2H), 1.36-1.27 (m, 6H), 0.87 (t,  $J$  = 6.5 Hz, 3H); <sup>13</sup>C-NMR (100 MHz)  $\delta$  = 164.93, 152.77, 138.67, 135.78, 128.74, 120.16, 119.81, 118.78, 35.33, 32.72, 31.69, 31.44, 28.87, 22.28, 19.89, 14.05, MS calcd for C<sub>17</sub>H<sub>25</sub>NO (H<sup>+</sup>) 260.19, found 260.70.

**(7e) N-(4-hexylphenyl)cinnamamide:** White solid, mp 117-119°C, yield 89 %; <sup>1</sup>H-NMR (400 MHz)  $\delta$  = 7.74 (d,  $J$  = 15.5 Hz, 1H), 7.57-7.49 (m, 5H), 7.36-7.35 (m, 3H), 7.15 (d,  $J$  = 8.2 Hz, 2H), 6.58 (d,  $J$  = 15.5 Hz, 1H), 2.57 (t,  $J$  = 7.8 Hz, 2H), 1.59 (p,  $J$  = 7.6 Hz, 2H), 1.36-1.24 (m, 6H), 0.89 (t,  $J$  = 6.7 Hz, 3H); <sup>13</sup>C-NMR (100 MHz)  $\delta$  = 1643.17, 141.93, 139.17, 135.70, 134.67, 129.74, 128.85, 128.74, 127.89, 121.14, 120.37, 120.16, 114.36, 35.37, 31.68, 31.41, 28.91, 22.57, 14.06; MS calcd for C<sub>21</sub>H<sub>25</sub>NO (H<sup>+</sup>) 308.19, found 309.00.

**(7f) 4-(4-hexylphenylamino)-2-methylene-4-oxobutanoic acid:** White solid, mp 185-187°C, yield 80%; (DMSO-d<sub>6</sub>) <sup>1</sup>H-NMR (400 MHz)  $\delta$  = 12.50 (s(br), CO<sub>2</sub>H, 1H), 9.89 (s, NH, 1H), 7.46 (d,  $J$  = 7.6 Hz, 2H), 7.09 (d,  $J$  = 7.8 Hz, 2H), 6.16 (m, 1H), 5.13 (m, 1H), 2.55 (m, 2H), 2.50 (t,  $J$  = 7.4 Hz, 2H), 1.52 (m, 2H), 1.28-1.23 (m, 6H), 0.85 (t,  $J$  = 6.6 Hz, 3H); <sup>13</sup>C-NMR (100 MHz)  $\delta$  = 168.07, 167.49, 136.85, 136.83, 135.79, 128.29, 127.32, 118.86, 34.45, 31.02, 30.91, 28.16, 21.97, 13.86 calcd for C<sub>17</sub>H<sub>23</sub>NO<sub>3</sub> (H<sup>+</sup>) 289.17, found 289.95.

**(7g) 4-(4-hexylphenylamino)-4-oxobutanoic acid:** White solid, mp 154-156°C, yield 78%; (DMSO-d<sub>6</sub>) <sup>1</sup>H-NMR (400 MHz)  $\delta$  = 12.1 (s, br, OH), 9.84 (s, br, NH), 7.46 (d,  $J$  = 8.3 Hz, 2H), 7.08 (d,  $J$  = 8.3 Hz, 2H), 2.55-2.47 (m, 6H), 1.52 (p,  $J$  = 6.4 Hz, 2H), 1.28-1.22 (m, 6H), 0.84 (t,  $J$  = 6.8 Hz, 3H); <sup>13</sup>C-NMR (100 MHz)  $\delta$  = 173.73, 169.68, 136.88, 136.71, 128.26, 118.81, 34.44, 31.01, 30.90, 30.87, 28.74, 28.15, 21.97, 13.85 MS calcd for C<sub>16</sub>H<sub>23</sub>NO<sub>3</sub> (H<sup>+</sup>) 278.17, found 278.89.

**General procedure for 8a-b:** To a solution of 4-hexylaniline (178  $\mu$ L, 1 mmol) or 4-hexylphenol (179  $\mu$ L, 1 mmol), propiolic acid (70  $\mu$ L, 1.3 mmol, 1.3 equiv.), 4-dimethylaminopyridine (0.01 mmol, 1.2 mg, 0.01 equiv) in DCM (5 mL) was added N,N'-diisopropylcarbodiimide (126  $\mu$ L, 1.3 mmol, 1.3 equiv.). The resulting reaction mixture was stirred at rt for 5 h, poured into NH<sub>4</sub>Cl (aq) (10 mL), diluted with ethyl acetate (10 mL) and the organic layer was separated. The aqueous layer was extracted with ethyl acetate (10 mL, twice) and the combined organic layers were dried over MgSO<sub>4</sub>, filtered, and concentrated *in vacuo*. Purification was done by flash column chromatography (SP1, 25M (SiO<sub>2</sub>), flow rate: 25 mL/min; gradient: 1% to 15% ethyl acetate in hexanes over 15 CV).



**(8a) N-(4-hexylphenyl)propiolamide:** White solid, mp 62-64°C, yield 79%; <sup>1</sup>H-NMR (400 MHz) δ = 7.53 (s (br), NH), 7.41 (d, *J* = 8.4 Hz, 2H), 7.14 (d, *J* = 8.4 Hz, 2H), 2.91 (s, 1H), 3.57 (t, *J* = 7.5 Hz, 2H), 1.58 (p, *J* = 7.4 Hz, 2H), 1.35-1.23 (m, 6H), 0.88 (t, *J* = 6.7 Hz, 3H); <sup>13</sup>C-NMR (100 MHz) δ = 154.70, 140.19, 134.38, 129.00, 120.07, 75.64, 74.02, 35.38, 31.68, 31.37, 28.87, 22.58, 14.07; MS calcd for C<sub>15</sub>H<sub>19</sub>O (H<sup>+</sup>) 229.15, found 229.8.

**(8b) 4-hexylphenyl propiolate:** Colorless liquid, yield 68%; <sup>1</sup>H-NMR (400 MHz) δ = 7.19 (d, *J* = 8.2 Hz, 2H), 7.04 (d, *J* = 8.2 Hz, 2H), 3.05 (s, 1H), 2.60 (t, *J* = 7.8 Hz, 2H), 2.05 (p, *J* = 7.2 Hz, 2H), 1.36-1.24 (m, 6H), 0.88 (t, *J* = 6.8 Hz, 3H); <sup>13</sup>C-NMR (100 MHz) δ = 151.15, 147.71, 141.38, 129.48, 120.83, 76.52, 74.37, 35.35, 31.67, 31.36, 28.42, 22.58, 14.57; MS calcd for C<sub>15</sub>H<sub>18</sub>O<sub>2</sub> (Na<sup>+</sup>) 253.29, found 253.68. MS calcd for C<sub>17</sub>H<sub>26</sub>O<sub>4</sub> (reaction with MeOH) (H<sup>+</sup>) 296.39, found 296.63.

**General procedure for 8c and 8e:** see general procedure for 3a-k.

**(8c) 2-chloro-1-(4-hexylphenyl)ethanone:** White solid, mp 42-44°C, yield 84%; <sup>1</sup>H-NMR (400 MHz) δ = 7.88 (d, *J* = 8.3 Hz, 2H), 7.30 (d, *J* = 8.3 Hz, 2H), 4.69 (s, 2H), 2.67 (t, *J* = 7.8 Hz, 2H), 1.63 (p, *J* = 7.7 Hz, 2H), 1.36-1.27 (m, 6H), 0.88 (t, *J* = 7.0 Hz, 3H); <sup>13</sup>C-NMR (100 MHz) δ = 190.69, 149.99, 131.93, 128.92, 128.66, 45.95, 36.07, 31.62, 30.98, 28.90, 22.55, 14.05; MS calcd for C<sub>14</sub>H<sub>19</sub>ClO (H<sup>+</sup>) 238.11, found 238.8.

**(8d) 2-fluoro-1-(4-hexylphenyl)ethanone:** Colorless liquid, yield 41%; <sup>1</sup>H-NMR (400 MHz) δ = 7.81 (d, *J* = 8.3 Hz, 2H), 7.30 (d, *J* = 8.1 Hz, 2H), 5.51 (d, *J* (H, F) = 47.0 Hz, 2H), 2.67 (t, *J* = 7.8 Hz, 2H), 1.63 (p, *J* = 7.7 Hz, 2H), 1.36-1.27 (m, 6H), 0.88 (t, *J* = 7.0 Hz, 3H); <sup>13</sup>C-NMR (100 MHz) δ = 192.08, 150.10, 131.40, 128.94, 127.96, 83.50 (d, *J* (C, F) = 183 Hz), 36.09, 31.61, 30.98, 28.88, 22.54, 14.04; MS calcd for C<sub>14</sub>H<sub>19</sub>FO (H<sup>+</sup>) 223.14, found 223.03.

**(8e) 3-bromo-1-(4-hexylphenyl)propan-1-one:** White solid, mp 48-50°C, yield 69% ; <sup>1</sup>H-NMR (400 MHz) δ = 7.87 (d, *J* = 8.2 Hz, 2H), 7.28 (d, *J* = 8.2 Hz, 2H), 3.74 (t, *J* = 6.9 Hz, 2H), 3.55 (t, *J* = 6.9 Hz, 2H), 2.66 (t, *J* = 7.7 Hz, 2H), 1.63 (p, *J* = 7.7 Hz, 2H), 1.36-1.24 (m, 6H), 0.88 (t, *J* = 6.9 Hz, 3H); <sup>13</sup>C-NMR (100 MHz) δ = 196.60, 149.42, 133.97, 128.76, 128.18, 41.43, 36.01, 31.63, 31.03, 28.90, 25.94, 22.55, 14.05; MS calcd for C<sub>15</sub>H<sub>21</sub>BrO (H<sup>+</sup>) 297.08, found 297.58.

**4-bromo-1-(4-hexylphenyl)butan-1-one:** Colorless liquid, yield 95% ; <sup>1</sup>H-NMR (400 MHz) δ = 7.90 (d, *J* = 8.1 Hz, 2H), 7.25 (d, *J* = 8.1 Hz, 2H), 3.55 (t, *J* = 6.4 Hz, 2H), 3.16 (t, *J* = 6.6 Hz, 2H), 2.66 (t, *J* = 7.5 Hz, 2H), 2.31 (p, *J* = 6.5 Hz, 2H), 1.63 (p, *J* = 7.7 Hz, 2H), 1.35-1.24 (m, 6H), 0.88 (t, *J* = 6.9 Hz, 3H); <sup>13</sup>C-NMR (100 MHz) δ = 198.46, 148.99, 134.46, 128.66, 128.14, 36.42, 35.99, 33.69, 31.64, 31.05, 28.90, 26.97, 22.55, 14.05; MS calcd for C<sub>16</sub>H<sub>23</sub>BrO (H<sup>+</sup>) 311.09, found 311.68.

**General procedure for 8f:** To a solution of 8e (296 mg, 1 mmol) in benzene (3 mL) was added DBU (1,8-Diazabicyclo[5.4.0]undec-7-ene) (150 μL, 1.1 mmol, 1.1 equiv.) and the reaction mixture was stirred 2 h at room temperature, filtered, and evaporated to yield crude 1. The crude product was resuspended in MeOH (5 mL) and treated with H<sub>2</sub>O<sub>2</sub> (30% in H<sub>2</sub>O) (0.3 mL, 3 mmol, 3 equiv.) and NaOH (1M in H<sub>2</sub>O) (1 mL). The reaction mixture was evaporated, dissolved in water, and extracted with ethyl acetate (20 mL, twice) and the combined organic layers were dried over MgSO<sub>4</sub>, filtered, and concentrated *in vacuo*. Purification was done by flash column chromatography (SP1, 25M (SiO<sub>2</sub>), flow rate: 25 mL/min; gradient: 1% to 15% ethyl acetate in hexanes over 15 CV).

**(8f) (4-hexylphenyl)(oxiran-2-yl)methanone:** Colorless liquid, yield 74%; <sup>1</sup>H-NMR (400 MHz) δ = 7.97 (d, *J* = 8.1 Hz, 2H), 7.30 (d, *J* = 8.1 Hz, 2H), 4.23 (m, 1H), 3.11 (m, 1H), 2.97 (m, 1H), 2.67 (t, *J* = 7.9 Hz, 2H), 1.63 (p, *J* = 7.1 Hz, 2H), 1.36-1.27 (m, 6H), 0.88 (t, *J* = 6.9 Hz, 3H); <sup>13</sup>C-NMR (100 MHz) δ = 194.12, 149.91, 133.14, 128.85, 128.46, 50.97, 47.49, 36.06, 31.60, 30.97, 28.87, 22.57, 14.03; MS calcd for C<sub>15</sub>H<sub>20</sub>O<sub>2</sub> (H<sup>+</sup>) 233.15, found 233.15.

**Table 1. Summary of  $\beta$ -aminophenylketones 3a–k data:** Yield, inhibition ( $IC_{50}$ ) of the interaction between coregulatory peptide SRC2-2 and TR $\alpha$ /TR $\beta$ , viability ( $LD_{50}$ ) of U2OS and ARO cells in the presence of compound, solubility in PBS buffer containing 5% DMSO, and permeability across an artificial membrane (PAMPA).

| Entry | R <sub>1</sub>                  | R <sub>2</sub>  | Compound  | Yield <sup>a</sup> (%) | Potency                                              |                                                     |                               | Cytotoxicity                                 |                                               | Property                           |                                             |
|-------|---------------------------------|-----------------|-----------|------------------------|------------------------------------------------------|-----------------------------------------------------|-------------------------------|----------------------------------------------|-----------------------------------------------|------------------------------------|---------------------------------------------|
|       |                                 |                 |           |                        | TR $\alpha$ <sup>b</sup> IC <sub>50</sub> ( $\mu$ M) | TR $\beta$ <sup>b</sup> IC <sub>50</sub> ( $\mu$ M) | TR $\alpha$ :TR $\beta$ ratio | ARO <sup>c</sup> LD <sub>50</sub> ( $\mu$ M) | U2OS <sup>c</sup> LD <sub>50</sub> ( $\mu$ M) | Solubility <sup>c</sup> ( $\mu$ M) | Permeability <sup>c</sup> ( $10^{-6}$ cm/s) |
| 1     | 2-phenylethyl                   | methyl          | <b>3a</b> | 84                     | 3.6<br>±0.6                                          | 1.5<br>±0.4                                         | 2.4                           | 2.5<br>±1.7                                  | 18.4<br>±4.1                                  | 15<br>±7                           | 57<br>±39                                   |
| 2     | 2-hydroxyethyl                  | methyl          | <b>3b</b> | 87                     | 3.0<br>±0.5                                          | 1.6<br>±0.2                                         | 1.9                           | 13.2<br>±3.2                                 | 13.2<br>±3.1                                  | 97<br>±13                          | 965<br>±212                                 |
| 3     | isopropyl                       | isopropyl       | <b>3c</b> | 81                     | 4.1<br>±0.4                                          | 2.0<br>±0.4                                         | 2.1                           | 15.4<br>±2.9                                 | 20.7<br>±2.7                                  | 55<br>±12                          | 747<br>±336                                 |
| 4     | pyrrolidine                     |                 | <b>3d</b> | 85                     | 4.3<br>±0.3                                          | 2.7<br>±0.3                                         | 1.6                           | 19.0<br>±6.0                                 | 38.4<br>±3.2                                  | 341<br>±29                         | 2144<br>±516                                |
| 5     | morpholine                      |                 | <b>3e</b> | 90                     | 4.1<br>±0.6                                          | 2.7<br>±0.4                                         | 1.5                           | 7.2<br>±3.1                                  | 20.8<br>±1.9                                  | 110<br>±17                         | 1210<br>±317                                |
| 6     | methyl piperidine-4-carboxylate |                 | <b>3f</b> | 86                     | 6.3<br>±0.7                                          | 3.9<br>±0.4                                         | 1.6                           | 8.2<br>±2.8                                  | 19.7<br>±2.5                                  | 27<br>±6                           | 145<br>±8                                   |
| 7     | <i>n</i> -butyl                 | <i>n</i> -butyl | <b>3g</b> | 90                     | 6.9<br>±0.7                                          | 4.2<br>±0.8                                         | 1.6                           | 5.4<br>±2.1                                  | 25.5<br>±3.1                                  | 152<br>±23                         | 1957<br>±575                                |
| 8     | methyl                          | methyl          | <b>3h</b> | 94                     | 10.6<br>±0.8                                         | 4.3<br>±0.7                                         | 2.5                           | 11.0<br>±4.1                                 | 34.9<br>±3.8                                  | 321<br>±31                         | 2323<br>±713                                |
| 9     | furan-2-ylmethyl                | methyl          | <b>3i</b> | 92                     | 22.6<br>±2.1                                         | 12.1<br>±1.3                                        | 1.9                           | 15.5<br>±4.2                                 | 18.6<br>±2.9                                  | 47<br>±5                           | 681<br>±172                                 |
| 10    | cyclohexyl                      | cyclohexyl      | <b>3j</b> | 78                     | 16.5<br>±1.8                                         | 12.7<br>±2.4                                        | 1.3                           | 25.6<br>±6.7                                 | 27.3<br>±4.1                                  | 32<br>±3                           | 104<br>±73                                  |
| 11    | <i>n</i> -propyl                | hydrogen        | <b>3k</b> | 93                     | 25.8<br>±1.9                                         | 15.2<br>±2.8                                        | 1.7                           | 102<br>±18.1                                 | 160<br>±29.3                                  | 354<br>±26                         | 254<br>±6                                   |

<sup>a</sup>Isolated yield; <sup>b</sup>values are means of two independent experiments done in quadruplicate; <sup>c</sup>values are means of two independent experiments done in triplicate.

**Table 2. Summary of enones **1** and **4a–e** and allylic alcohols **5b–e**:** Yield, IC<sub>50</sub> values of the inhibition between coregulatory peptide SRC2-2 and TR $\alpha$ /TR $\beta$ , viability (LD<sub>50</sub>) of U2OS and ARO cells in the presence of compound, solubility in PBS buffer containing 5% DMSO, and permeability across an artificial membrane (PAMPA).

|       |                                                         |           |                                 |                                 | Potency                                              |                                                     |                               | Cytotoxicity                                 |                                               | Property                           |                                                   |
|-------|---------------------------------------------------------|-----------|---------------------------------|---------------------------------|------------------------------------------------------|-----------------------------------------------------|-------------------------------|----------------------------------------------|-----------------------------------------------|------------------------------------|---------------------------------------------------|
| Entry | R <sub>1</sub> = 4-hexylbenzene and R = 4-heptylbenzene | Compound  | Yield <sup>a</sup> <b>5</b> (%) | Yield <sup>a</sup> <b>4</b> (%) | TR $\alpha$ <sup>b</sup> IC <sub>50</sub> ( $\mu$ M) | TR $\beta$ <sup>b</sup> IC <sub>50</sub> ( $\mu$ M) | TR $\alpha$ :TR $\beta$ ratio | ARO <sup>c</sup> LD <sub>50</sub> ( $\mu$ M) | U2OS <sup>c</sup> LD <sub>50</sub> ( $\mu$ M) | Solubility <sup>c</sup> ( $\mu$ M) | Permeability <sup>c</sup> (10 <sup>-6</sup> cm/s) |
| 1     |                                                         | <b>1</b>  | -                               | 55                              | 28.1 ±2.1                                            | 1.5 ±0.7                                            | 18.7                          | 4.5 ±1.5                                     | 10.1 ±3.6                                     | 36 ±7                              | 38 ±19                                            |
| 2     |                                                         | <b>4a</b> | -                               | 45                              | 19.2 ±1.8                                            | 17.7 ±2.4                                           | 1.1                           | 5.5 ±1.3                                     | 57.4 ±19.5                                    | 252 ±19                            | 66 ±15                                            |
| 3     |                                                         | <b>4b</b> | 67                              | 57                              | 18.9 ±2.5                                            | 7.6 ±1.8                                            | 2.5                           | 1.4 ±0.6                                     | 11.6 ±10.2                                    | 41 ±10                             | 7 ±5                                              |
| 4     |                                                         | <b>4c</b> | 67                              | 67                              | 52.9 ±5.6                                            | 23.2 ±3.5                                           | 2.3                           | 10.7 ±4.0                                    | 18.7 ±3.1                                     | 37 ±11                             | 43 ±14                                            |
| 5     |                                                         | <b>4d</b> | 51                              | 64                              | >100                                                 | >100                                                | -                             | >200                                         | >200                                          | 24 ±14                             | 0                                                 |
| 6     |                                                         | <b>4e</b> | 46                              | 59                              | >100                                                 | >100                                                | -                             | >200                                         | >200                                          | 36 ±9                              | 0                                                 |
| 7     |                                                         | <b>4f</b> | 54                              | 77                              | >100                                                 | >100                                                | -                             | >200                                         | 57.0 ±8.9                                     | 30 ±5                              | 0                                                 |
| 8     |                                                         | <b>4g</b> | -                               | 85                              | >100                                                 | >100                                                | -                             | >200                                         | >200                                          | 14 ±2                              | 0                                                 |

<sup>a</sup>Isolated yield; <sup>b</sup>values are means of two independent experiments done in quadruplicate; <sup>c</sup>values are means of two independent experiments done in triplicate.

**Table 3. Summary of IC<sub>50</sub> values of 6a–m:** Yields; inhibition of coregulatory peptide SRC2-2 and TR $\alpha$ /TR $\beta$  binding; viability (LD<sub>50</sub>) of U2OS and ARO cell in the presence of compounds.

| Entry |                                                       | Compound  | Yield <sup>a</sup><br>(%) | Potency                                                    |                                                           |                                      | Cytotoxicity                                       |                                                     |
|-------|-------------------------------------------------------|-----------|---------------------------|------------------------------------------------------------|-----------------------------------------------------------|--------------------------------------|----------------------------------------------------|-----------------------------------------------------|
|       |                                                       |           |                           | TR $\alpha$ <sup>b</sup><br>IC <sub>50</sub><br>( $\mu$ M) | TR $\beta$ <sup>b</sup><br>IC <sub>50</sub><br>( $\mu$ M) | TR $\alpha$ :<br>TR $\beta$<br>ratio | ARO <sup>c</sup><br>LD <sub>50</sub><br>( $\mu$ M) | U2OS <sup>c</sup><br>LD <sub>50</sub><br>( $\mu$ M) |
| 1     | 4- <i>n</i> -propylphenyl                             | <b>6a</b> | 85                        | >100                                                       | 100                                                       | -                                    | 20.2<br>±6.1                                       | 43.9<br>±5.1                                        |
| 2     | 4- <i>n</i> -butylphenyl                              | <b>6b</b> | 86                        | 71.0<br>±7.3                                               | 66.0<br>±8.4                                              | 1.1                                  | 9.9<br>±2.6                                        | 25.6<br>±4.0                                        |
| 3     | 4- <i>n</i> -pentylphenyl                             | <b>6c</b> | 88                        | 60.9<br>±6.8                                               | 33.9<br>±5.5                                              | 1.8                                  | 20.0<br>±6.1                                       | 22.7<br>±3.1                                        |
| 4     | 4- <i>tert</i> -pentylphenyl                          | <b>6d</b> | 94                        | 69.6<br>±9.1                                               | 43.5<br>±7.3                                              | 1.6                                  | 5.8<br>±1.9                                        | 27.5<br>±3.2                                        |
| 5     | 4- <i>n</i> -hexylphenyl                              | <b>6e</b> | 89                        | 45.2<br>±4.3                                               | 18.6<br>±2.1                                              | 2.4                                  | 29.5<br>±6.3                                       | 18.8<br>±3.9                                        |
| 6     | 4- <i>n</i> -heptylphenyl                             | <b>6f</b> | 76                        | 23.0<br>±3.8                                               | 10.5<br>±1.9                                              | 2.2                                  | 69.2<br>±8.1                                       | 36.7<br>±5.3                                        |
| 7     | 4- <i>n</i> -octylphenyl                              | <b>6g</b> | 81                        | 21.4<br>±2.1                                               | 11.4<br>±2.9                                              | 1.9                                  | 111<br>±12.3                                       | 50.5<br>±10.1                                       |
| 8     | ( <i>trans</i> ) 4- <i>tert</i> -<br>pentylcyclohexyl | <b>6h</b> | 62                        | 75.6<br>±10.3                                              | 69.1<br>±6.9                                              | 1.1                                  | 92.8<br>±21.8                                      | 50.2<br>8.9                                         |
| 9     | 4- <i>n</i> -propylbenzoate                           | <b>6i</b> | 75                        | >100                                                       | 61.0<br>±7.5                                              | -                                    | 4.8<br>±1.1                                        | 121<br>±15.3                                        |
| 10    | 4- <i>n</i> -pentylbenzoate                           | <b>6j</b> | 71                        | >100                                                       | 55.8<br>±7.1                                              | -                                    | 21.2<br>±3.9                                       | 36.5<br>±9.1                                        |
| 11    | 2- <i>n</i> -hexylbenzoate                            | <b>6k</b> | 85                        | 39.1<br>±6.9                                               | 8.2<br>±3.4                                               | 4.8                                  | 14.6<br>±2.2                                       | 19.4<br>±2.9                                        |
| 12    | 4- <i>n</i> -butyramidophenyl                         | <b>6l</b> | 73                        | >100                                                       | 85.9<br>±10.0                                             | -                                    | 8.6<br>±2.0                                        | 242<br>±39.1                                        |
| 13    | 5,6,7,8-tetrahydronaphthyl                            | <b>6m</b> | 77                        | 85.3<br>±9.4                                               | 69.8<br>±9.0                                              | 1.2                                  | 54.7<br>±11.3                                      | 101<br>±20.6                                        |

<sup>a</sup>Isolated yield; <sup>b</sup>values are means of two independent experiments done in quadruplicate; the general error limits are 10%; <sup>c</sup>values are means of two independent experiments done in triplicate; the general error limits are 10-15%.

**Table 4. Summary of acrylamides 7a–g:** Yield, IC<sub>50</sub> values of the inhibition between coregulatory peptide SRC2-2 and TR $\alpha$ /TR $\beta$ , viability (LD<sub>50</sub>) of U2OS and ARO cells in the presence of compound, solubility in PBS buffer containing 5% DMSO, and permeability across an artificial membrane (PAMPA).

| Entry | R = 4-hexylbenzene | Compound  | Yield <sup>a</sup> (%) | Potency                                              |                                                     |                                | Cytotoxicity                                 |                                               | Property              |                                      |
|-------|--------------------|-----------|------------------------|------------------------------------------------------|-----------------------------------------------------|--------------------------------|----------------------------------------------|-----------------------------------------------|-----------------------|--------------------------------------|
|       |                    |           |                        | TR $\alpha$ <sup>b</sup> IC <sub>50</sub> ( $\mu$ M) | TR $\beta$ <sup>b</sup> IC <sub>50</sub> ( $\mu$ M) | TR $\alpha$ : TR $\beta$ ratio | ARO <sup>c</sup> LD <sub>50</sub> ( $\mu$ M) | U2OS <sup>c</sup> LD <sub>50</sub> ( $\mu$ M) | Solubility ( $\mu$ M) | Permeability (10 <sup>-6</sup> cm/s) |
| 1     |                    | <b>7a</b> | 88                     | 21.6<br>±1.5                                         | 20.3<br>±1.8                                        | 1.1                            | 113<br>±21.3                                 | 66.5<br>±13.9                                 | 47<br>±8              | 833<br>±71                           |
| 2     |                    | <b>7b</b> | 85                     | 17.5<br>±2.1                                         | 17.9<br>±1.9                                        | 1.0                            | >200                                         | 148<br>±24.3                                  | 418<br>±38            | 29<br>±4                             |
| 3     |                    | <b>7c</b> | 78                     | >100                                                 | >100                                                | -                              | >200                                         | >200                                          | 42<br>±8              | 432<br>±61                           |
| 4     |                    | <b>7d</b> | 84                     | >100                                                 | >100                                                | -                              | >200                                         | >200                                          | 37<br>±7              | 98<br>±16                            |
| 5     |                    | <b>7e</b> | 89                     | >100                                                 | >100                                                | -                              | 174<br>±23.4                                 | 69.4<br>±8.3                                  | 105<br>±18            | 14<br>±6                             |
| 6     |                    | <b>7f</b> | 80                     | >100                                                 | >100                                                | -                              | 183<br>±29.1                                 | 124<br>±15.3                                  | 286<br>±36            | 57<br>±4                             |
| 7     |                    | <b>7g</b> | 78                     | >100                                                 | >100                                                | -                              | >200                                         | >200                                          | 372<br>±31            | 48<br>±13                            |

<sup>a</sup>Isolated yield; <sup>b</sup>values are means of two independent experiments done in quadruplicate; <sup>c</sup>values are means of two independent experiments done in triplicate.

**Table 5. Summary of electrophilic compounds 8a–f:** Yield, IC<sub>50</sub> values of the inhibition between coregulatory peptide SRC2-2 and TR $\alpha$ /TR $\beta$ , viability (LD<sub>50</sub>) of U2OS and ARO cells in the presence of compound, solubility in PBS buffer containing 5% DMSO, and permeability across an artificial membrane (PAMPA).

| Entry | R = 4-hexylbenzene | Compound  | Yield <sup>a</sup> (%) | Potency                                              |                                                     |                                | Cytotoxicity                                 |                                               | Property              |                                      |
|-------|--------------------|-----------|------------------------|------------------------------------------------------|-----------------------------------------------------|--------------------------------|----------------------------------------------|-----------------------------------------------|-----------------------|--------------------------------------|
|       |                    |           |                        | TR $\alpha$ <sup>b</sup> IC <sub>50</sub> ( $\mu$ M) | TR $\beta$ <sup>b</sup> IC <sub>50</sub> ( $\mu$ M) | TR $\alpha$ : TR $\beta$ ratio | ARO <sup>c</sup> LD <sub>50</sub> ( $\mu$ M) | U2OS <sup>c</sup> LD <sub>50</sub> ( $\mu$ M) | Solubility ( $\mu$ M) | Permeability (10 <sup>-6</sup> cm/s) |
| 1     |                    | <b>8a</b> | 63                     | 68.9<br>±7.1                                         | 35.1<br>±5.1                                        | 2.0                            | 8.0<br>±2.1                                  | 17.1<br>±2.3                                  | 60<br>±21             | 621<br>±62                           |
| 2     |                    | <b>8b</b> | 57                     | 16.7<br>±1.3                                         | 6.2<br>±0.9                                         | 2.7                            | 7.9<br>±2.5                                  | 13.9<br>±2.9                                  | 18<br>±7              | 21<br>±9                             |
| 3     |                    | <b>8c</b> | 84                     | 47.7<br>±4.1                                         | 23.1<br>±1.6                                        | 2.1                            | 12.2<br>±3.1                                 | 8.3 ±2.1                                      | 103<br>±23            | 1029<br>±225                         |
| 4     |                    | <b>8d</b> | 41                     | >100                                                 | >100                                                | -                              | 2.4<br>±0.7                                  | 69 ±9.1                                       | 95<br>±18             | 974<br>±88                           |
| 5     |                    | <b>8e</b> | 69                     | 4.2<br>±0.9                                          | 3.0<br>±0.8                                         | 1.4                            | 40.1<br>±6.3                                 | 17 ±4.3                                       | 85<br>±29             | 1190<br>±41                          |
| 6     |                    | <b>8f</b> | 95                     | >100                                                 | >100                                                | -                              | 28.7<br>±5.4                                 | 25.3<br>±4.1                                  | 26<br>±11             | 58<br>±5                             |
| 7     |                    | <b>8g</b> | 74                     | 33.2<br>±5.3                                         | 19.1<br>±4.8                                        | 1.7                            | >200                                         | 58 ±6.0                                       | 204<br>±19            | 1117<br>±41                          |

<sup>a</sup>Isolated yield; <sup>b</sup> values are means of two independent experiments done in quadruplicate; <sup>c</sup> values are means of two independent experiments done in triplicate.

## Spectral data 3a

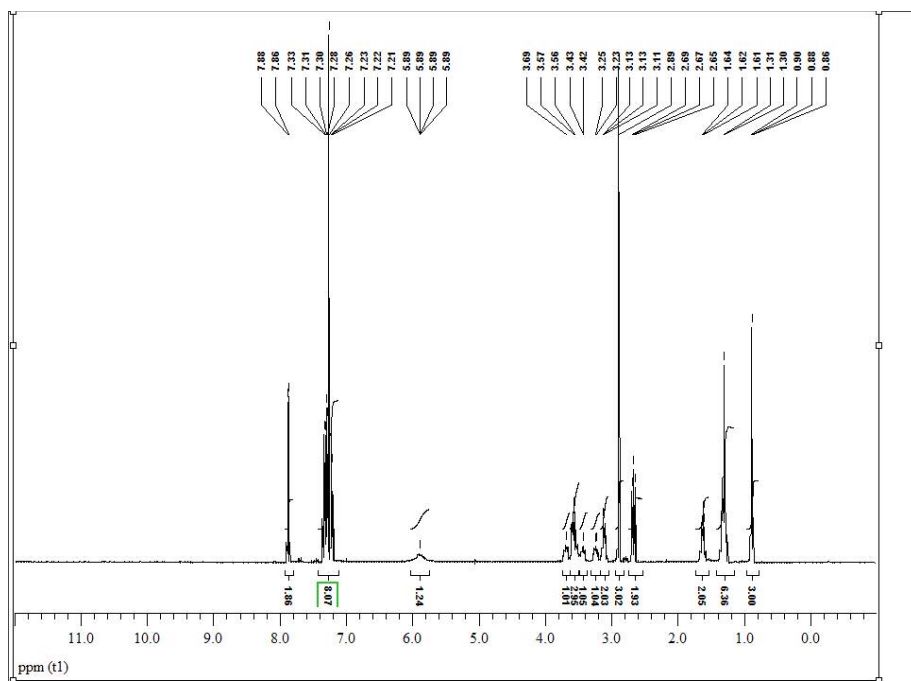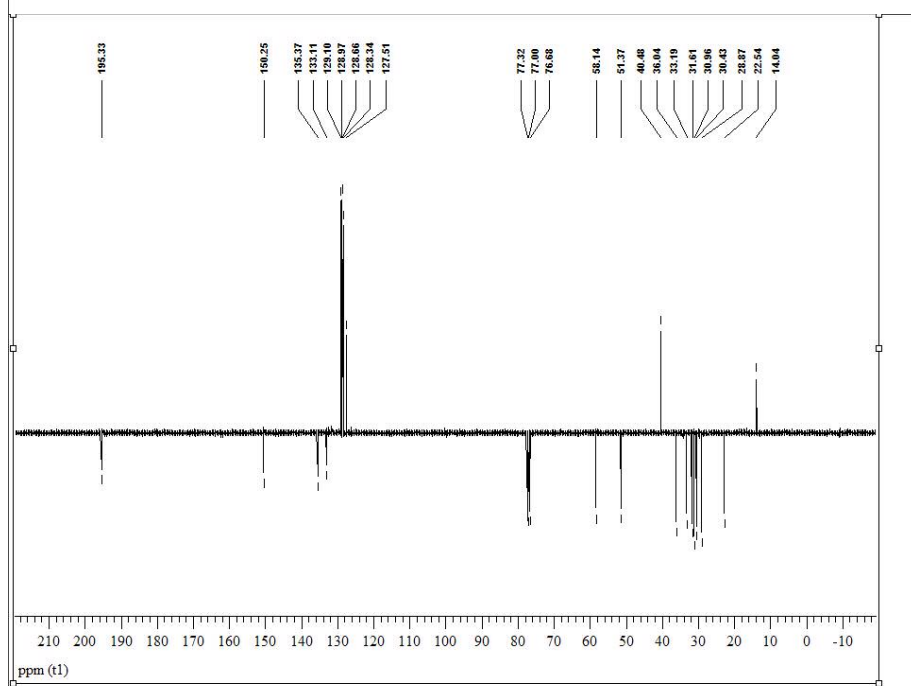

Sample 1  
Date: 07 Dec 2005  
Vial: 13.0  
Time: 15:45:24  
File: AK3  
Page 1

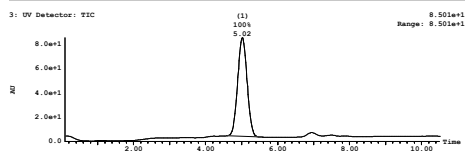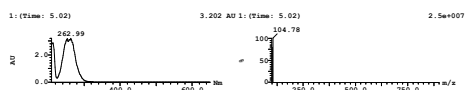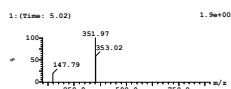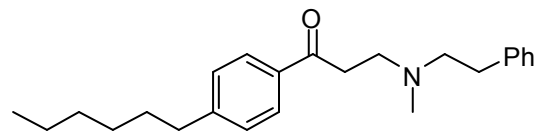

1-(4-hexylphenyl)-3-(methyl(phenethyl)amino)propan-1-one

Spectral data 3b



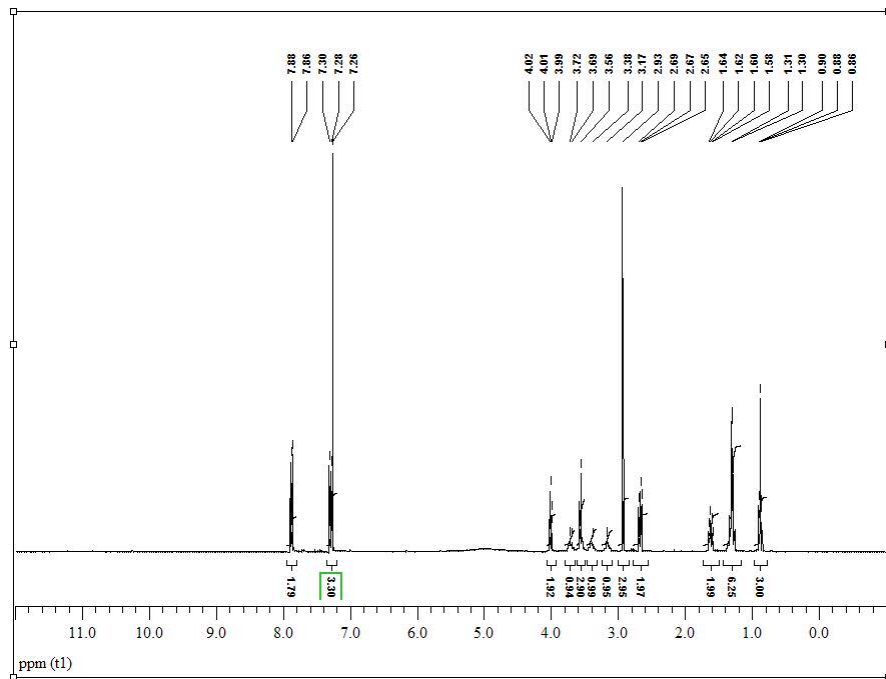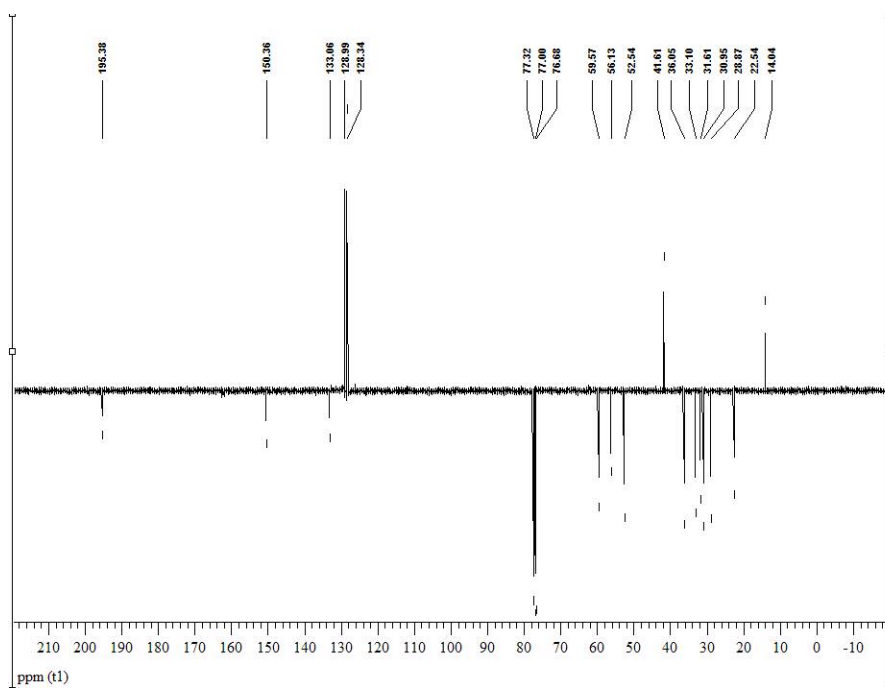

Sample 1  
Date: 15-Dec-2005  
Vial: 12A  
Time: 19:27:54  
File: LAAG43\_1  
Page 1

3: UV Detector: TIC  
6.359e+1  
Range: 6.356e+1

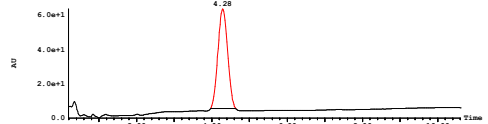

| Peak Number | Time | Area  | Area % Total | Width | Height  | Mass Found |
|-------------|------|-------|--------------|-------|---------|------------|
| 1           | 4.28 | 2e+07 | 100.00       | 0.7   | 5.8e+07 |            |

1: (Time: 4.28) 2.688 AU 1: (Time: 4.28) 9.7e+006

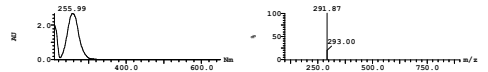

1: (Time: 4.28) 1.2e+008

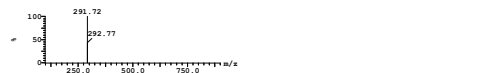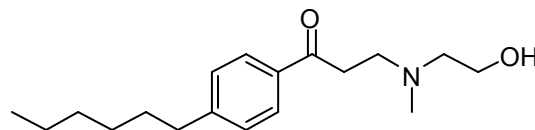

1-(4-hexylphenyl)-3-((2-hydroxyethyl)(methyl)amino)propan-1-one

### Spectral data 3c

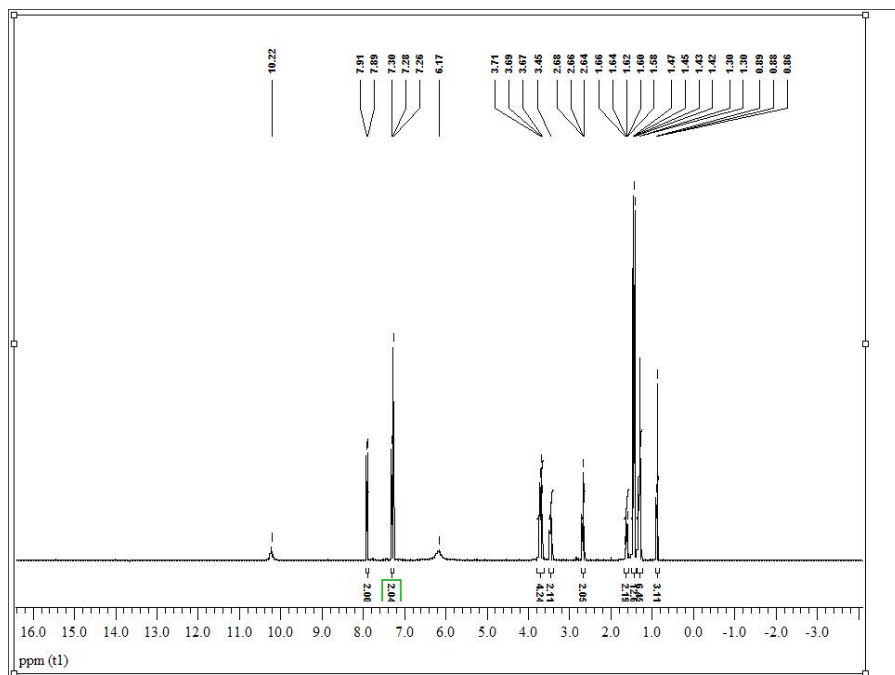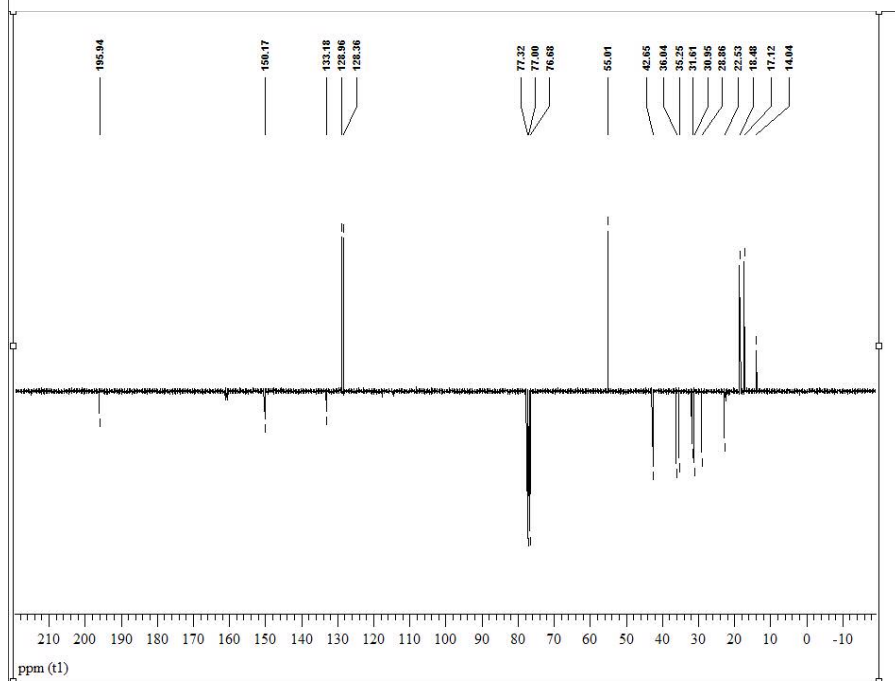

Sample: 1  
Date: 20-Mar-2006  
Vial: 2:2.C  
Time: 14:37:29  
File: ak4  
Page: 1

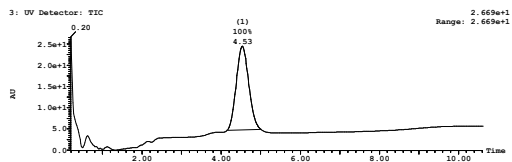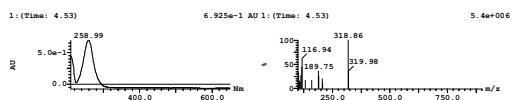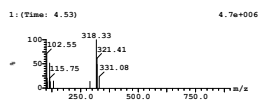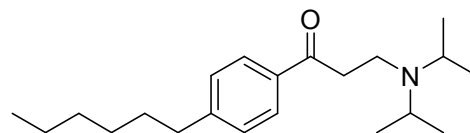

3-(diisopropylamino)-1-(4-hexylphenyl)propan-1-one

Spectral data 3d

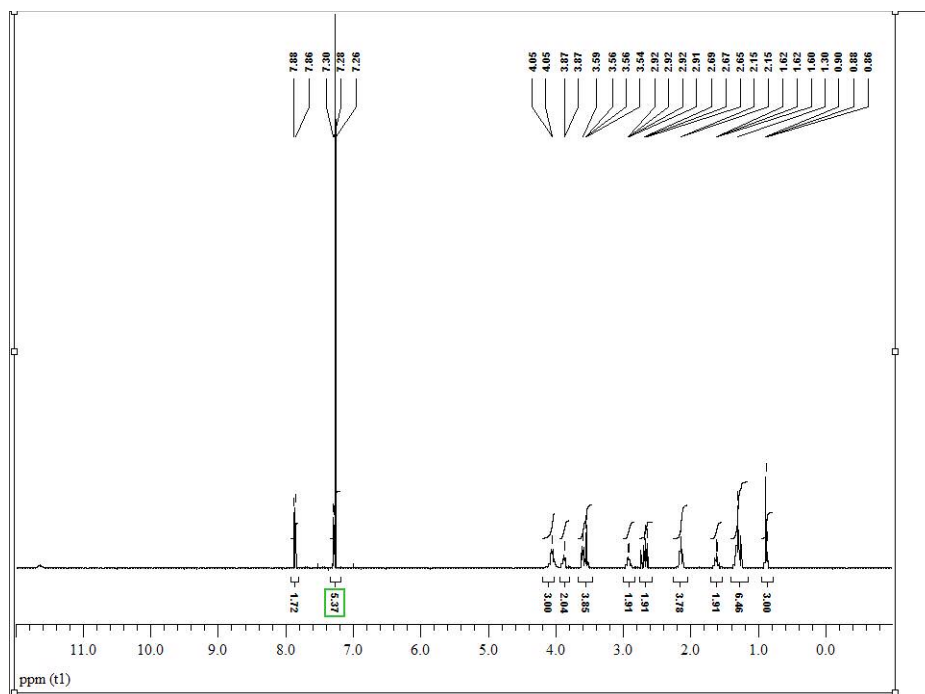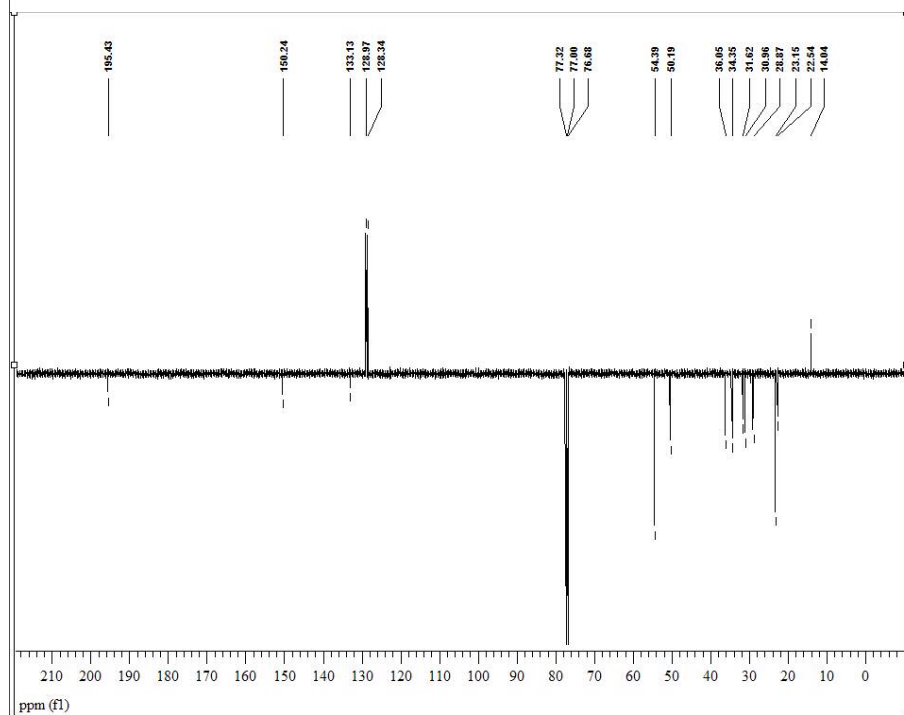

Sample: 1  
Date: 07-Dec-2005  
Val: 1.8.E  
Time: 17:18:21  
File: ANS  
Page: 1

3: UV Detector: XYZ  
Range: 3.66E+1

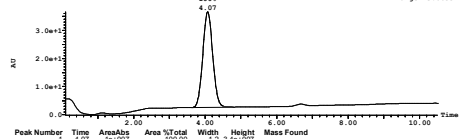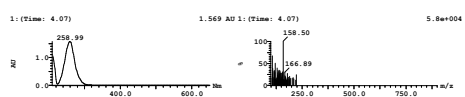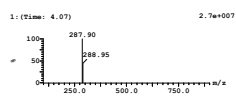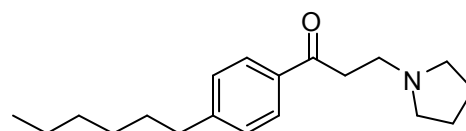

1-(4-hexylphenyl)-3-(pyrrolidin-1-yl)propan-1-one

Spectral data 3e

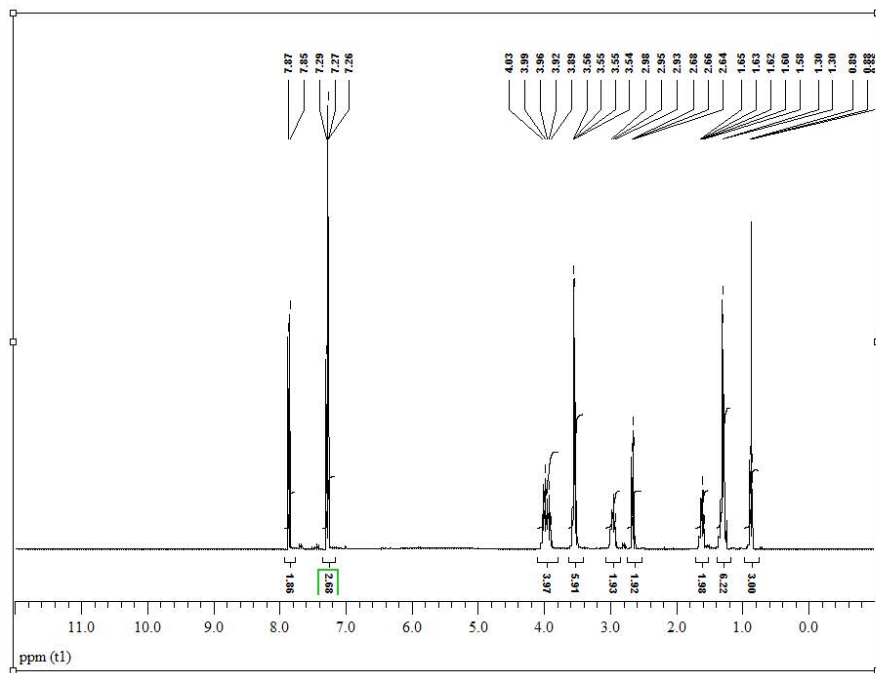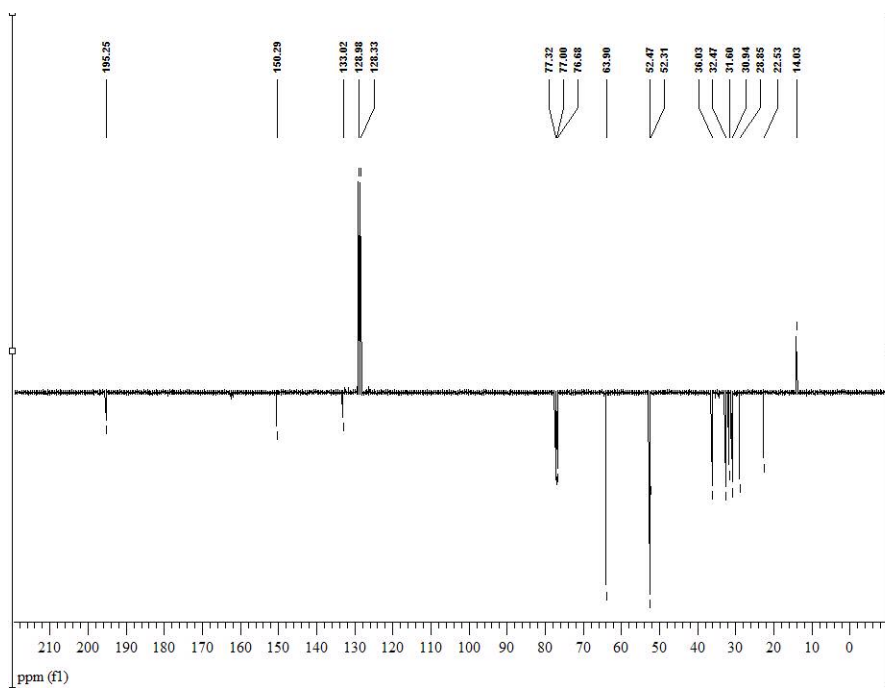

Page 1

Sample: 1      Vial: 14.F      File: AK2  
 Date: 05-Dec-2005      Time: 13:34:08

1: UV Detector: SIC      (1)      1.27e+2  
 Range: 1.249e+2

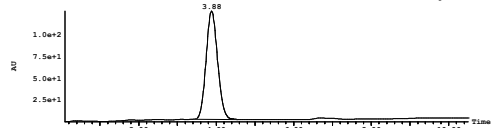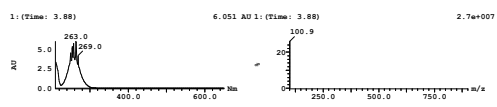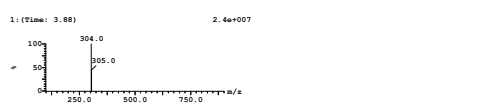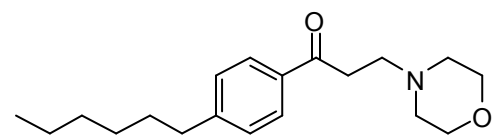

1-(4-hexylphenyl)-3-morpholinopropan-1-one

Spectral data 3f

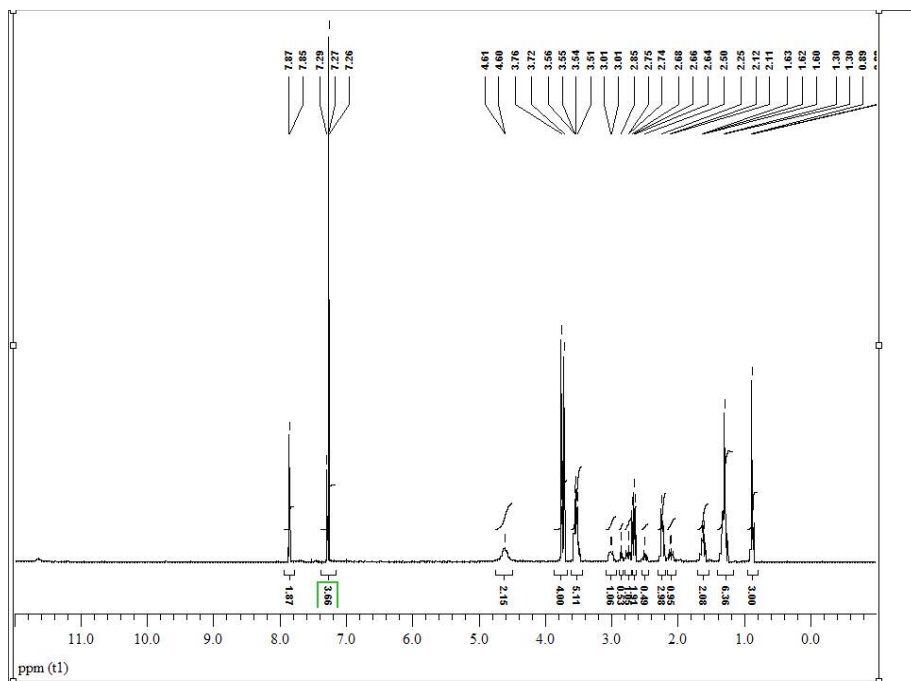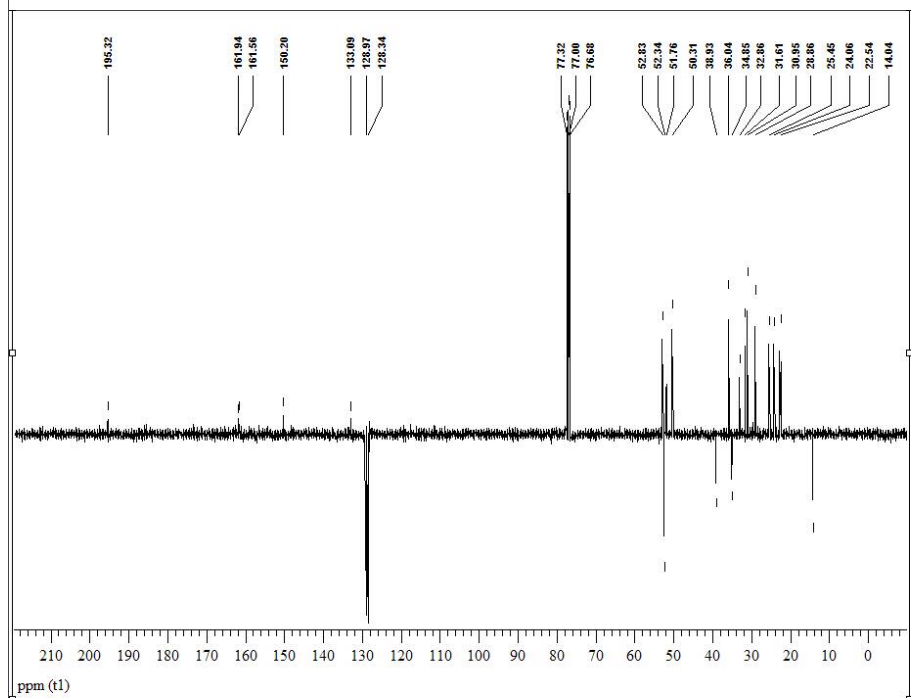

Sample: 1 Val: 14.0 File: JK5 Page: 1  
Date: 07-Dec-2005 Time: 15:56:30

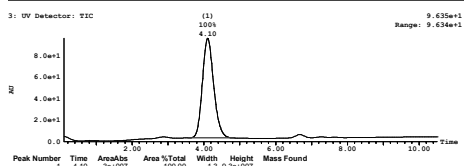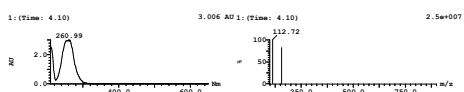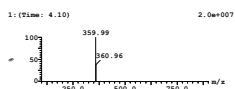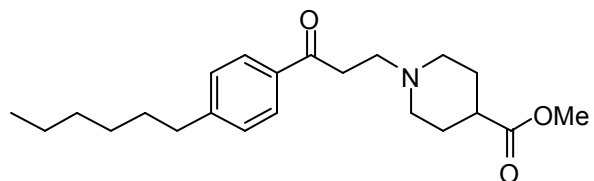

methyl 1-(3-(4-hexylphenyl)-3-oxopropyl)piperidine-4-carboxylate

### Spectral data 3g

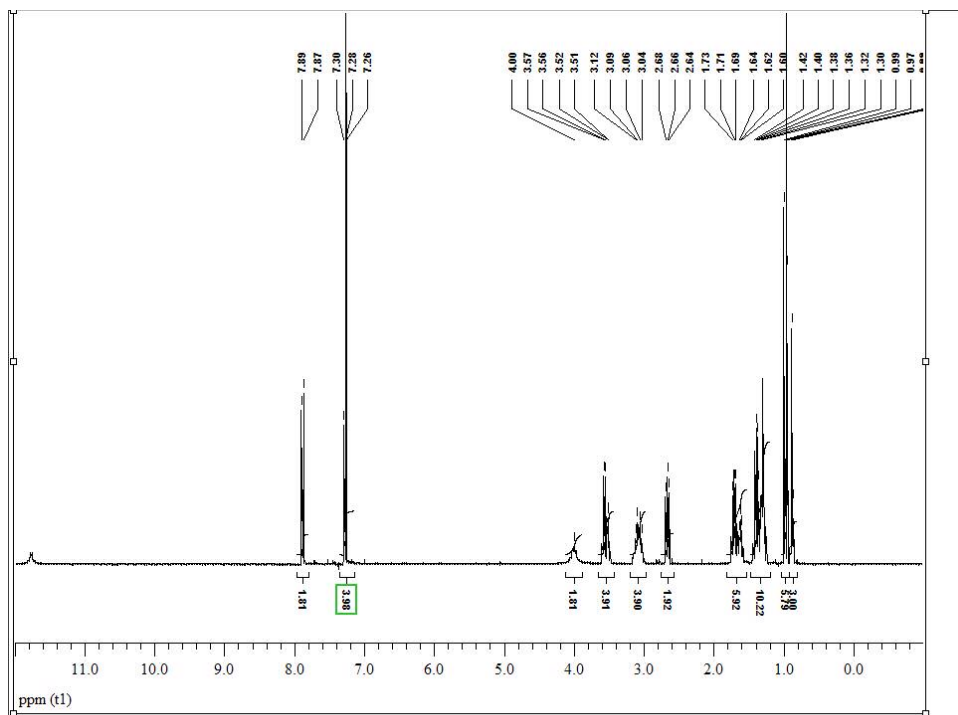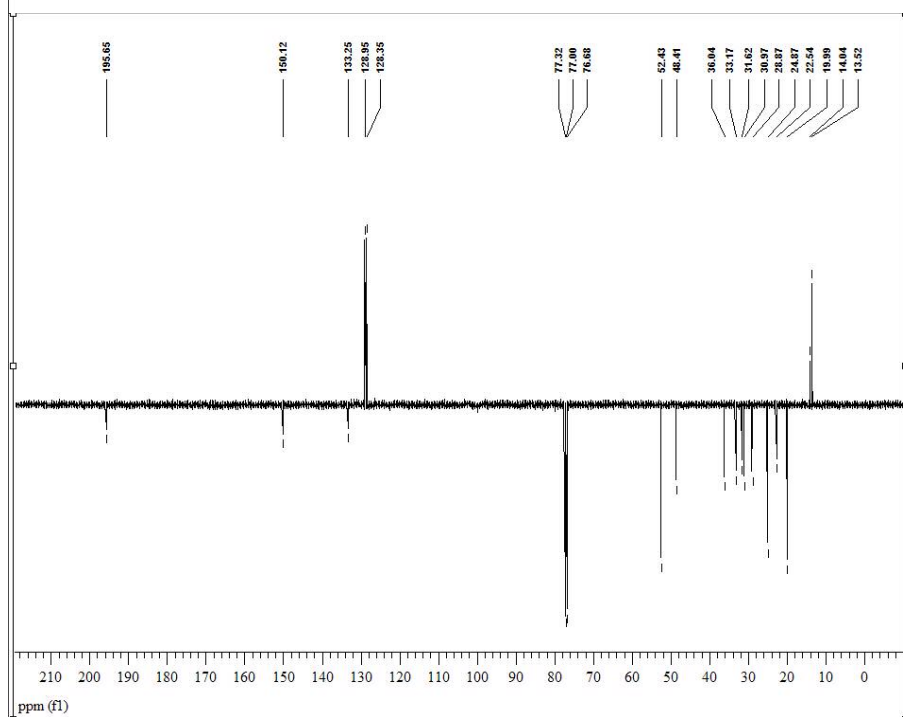

Sample: 1  
Date: 18-Apr-2006  
Vial: 33.A  
Time: 17.4051  
File: LAAG163\_13  
Page: 1

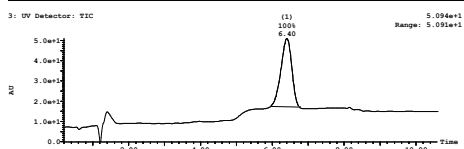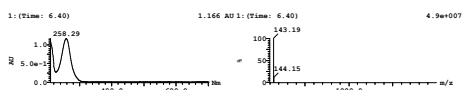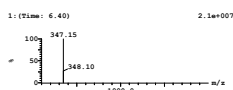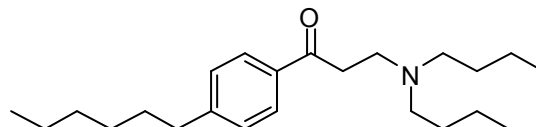

3-(dibutylamino)-1-(4-hexylphenyl)propan-1-one

## Spectral data 3h

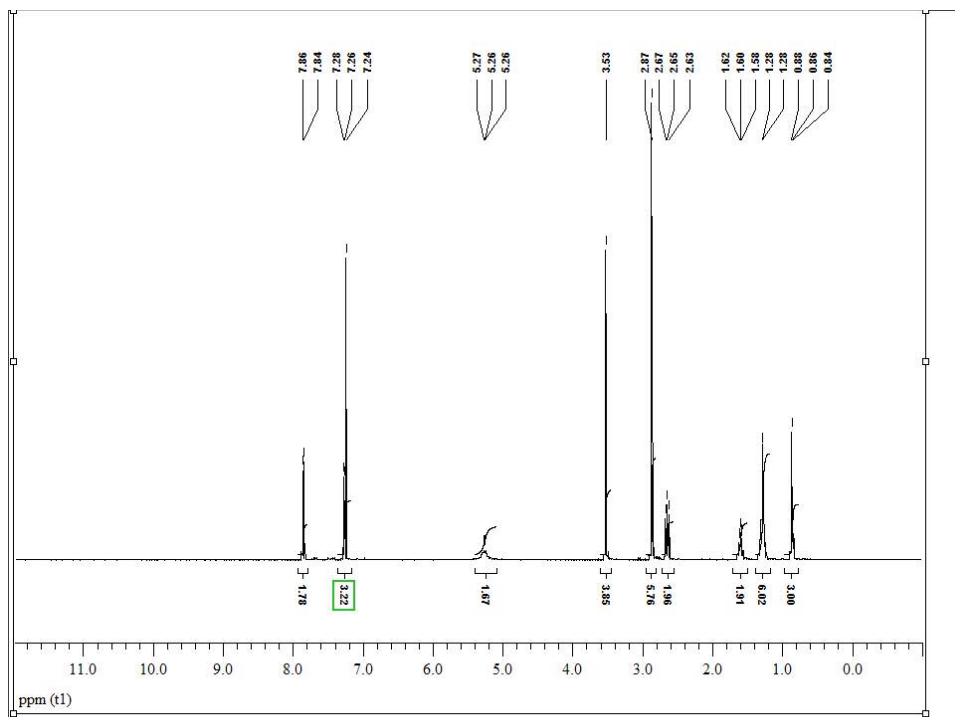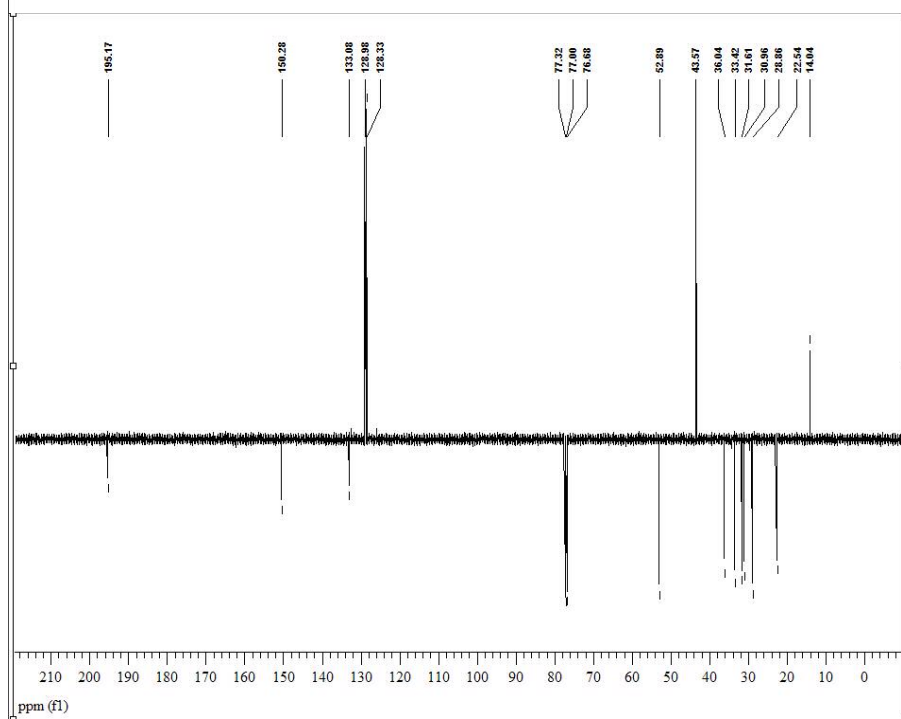

Sample: 1  
Date: 07-Dec-2005  
Val: 15.D  
Time: 10:07:43  
File: AK6  
Page: 1

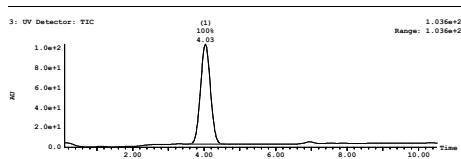

| Peak Number | Time | AreaAbs | Area %Total | Width | Height   | Mass Found |
|-------------|------|---------|-------------|-------|----------|------------|
| 1           | 4.03 | 3e+007  | 100.00      | 1.0   | 1.0e+008 |            |

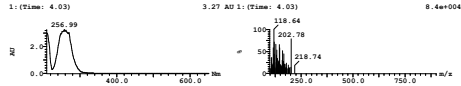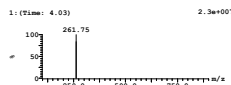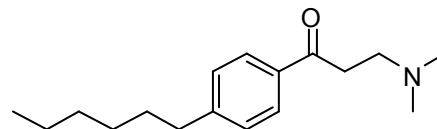

3-(dimethylamino)-1-(4-hexylphenyl)propan-1-one

Spectral data 3i

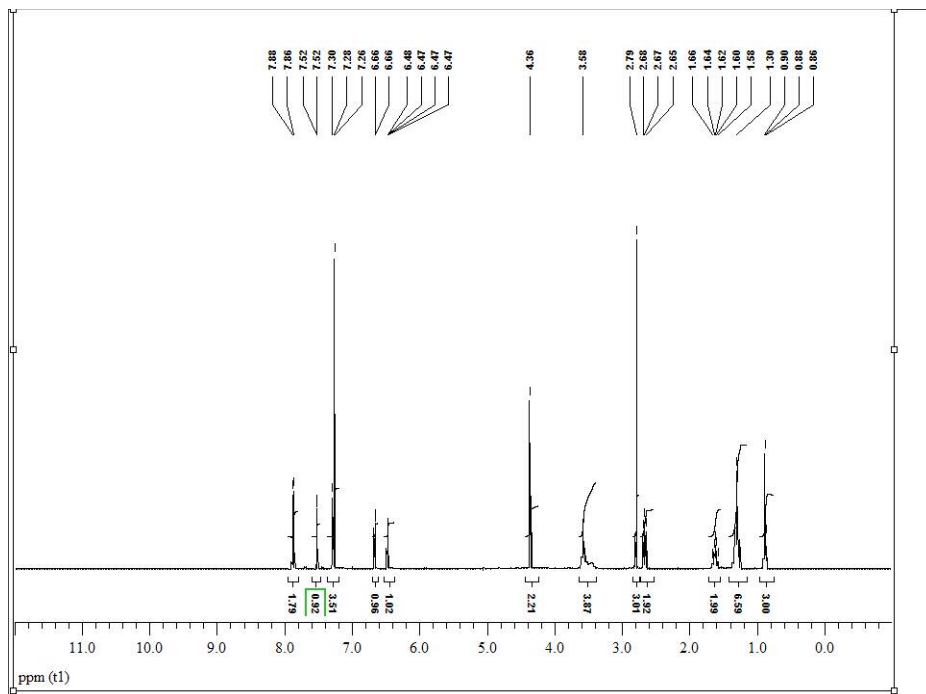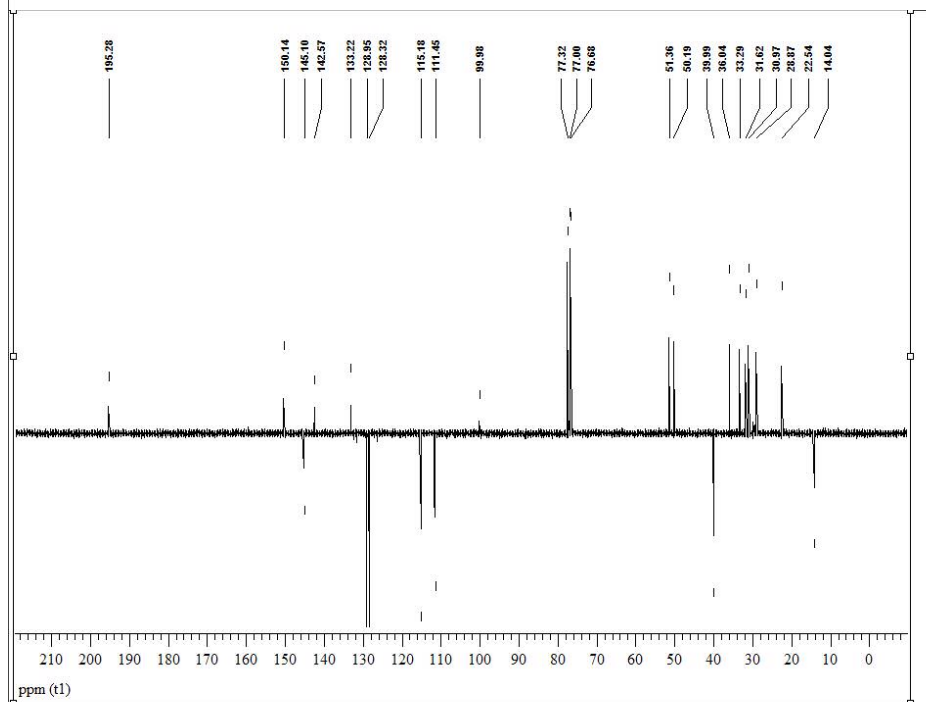

Sample 2 Val: 14.A File: ak9 Page 1  
Date: 15-Dec-2005 Time: 19:30:08

3: UV Detector: TIC (1) 1.589e+1  
Range: 1.584e+1

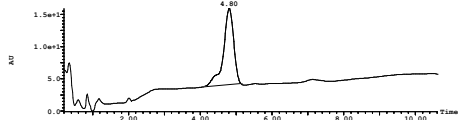

| Peak Number | Time | AreaAbs | Area%Total | Width | Height   | Mass Found |
|-------------|------|---------|------------|-------|----------|------------|
| 1           | 4.80 | 4e+05   | 100.00     | 1.1   | 1.2e+007 |            |

1: (Time: 4.80) 5.67e+1 AD 1: (Time: 4.80) 5.0e+007

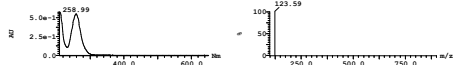

1: (Time: 4.80) 6.4e+007

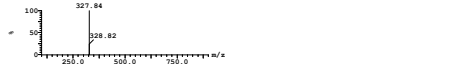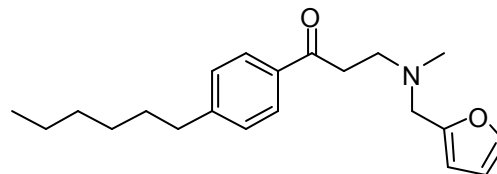

3-((furan-2-ylmethyl)(methyl)amino)-1-(4-hexylphenyl)propan-1-one

### Spectral data 3j





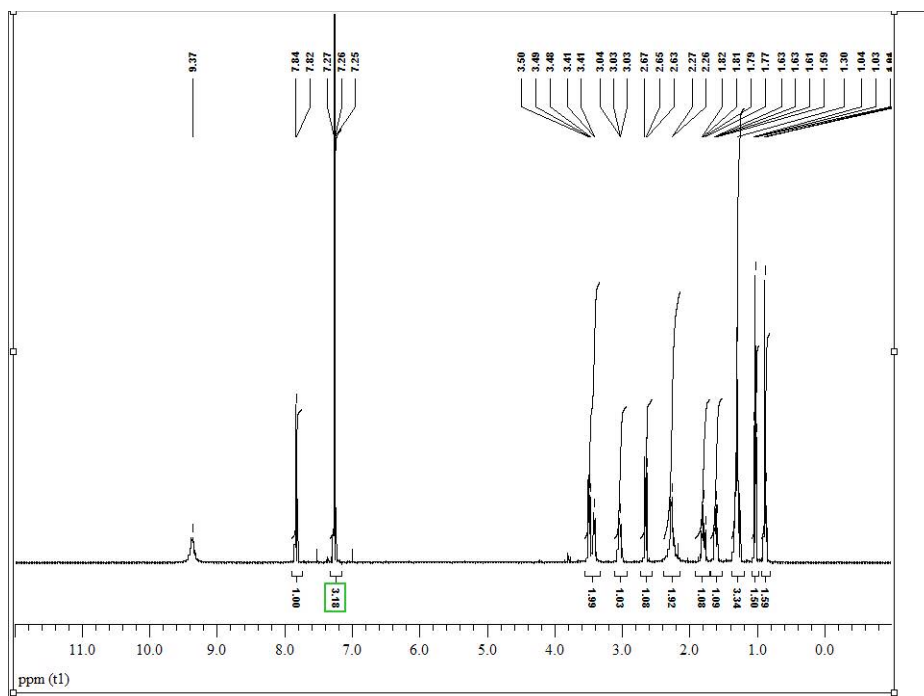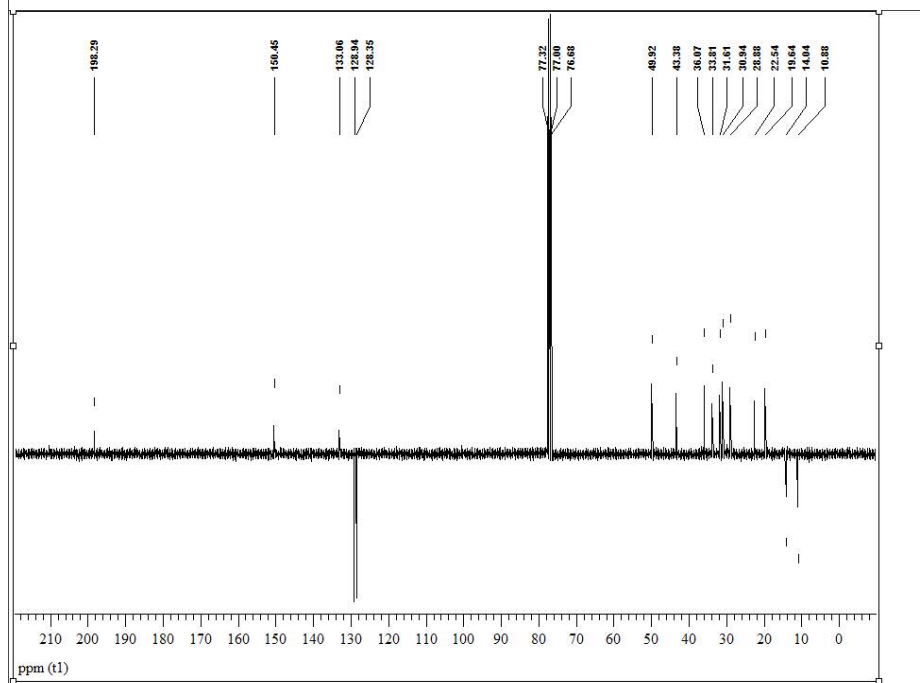

Sample: 1 Val: 17.0 File: AK11 Page: 1  
Date: 07-Dec-2005 Time: 16:29:55

3: UV Detector: FID (1) 6.307e+1 Range: 6.956e+1  
4.40

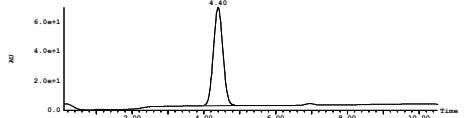

| Peak Number | Time | Area   | Area%  | Total | Width    | Height | Mass Found |
|-------------|------|--------|--------|-------|----------|--------|------------|
| 1           | 4.40 | 2e+007 | 100.00 | 1.0   | 6.7e+007 |        |            |

1: (Time: 4.40) 2.893 AD 1: (Time: 4.40) 5.7e+005

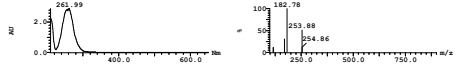

1: (Time: 4.40) 2.0e+007

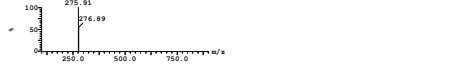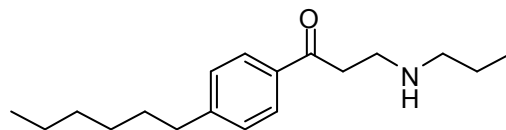

1-(4-hexylphenyl)-3-(propylamino)propan-1-one

### Spectral data 1

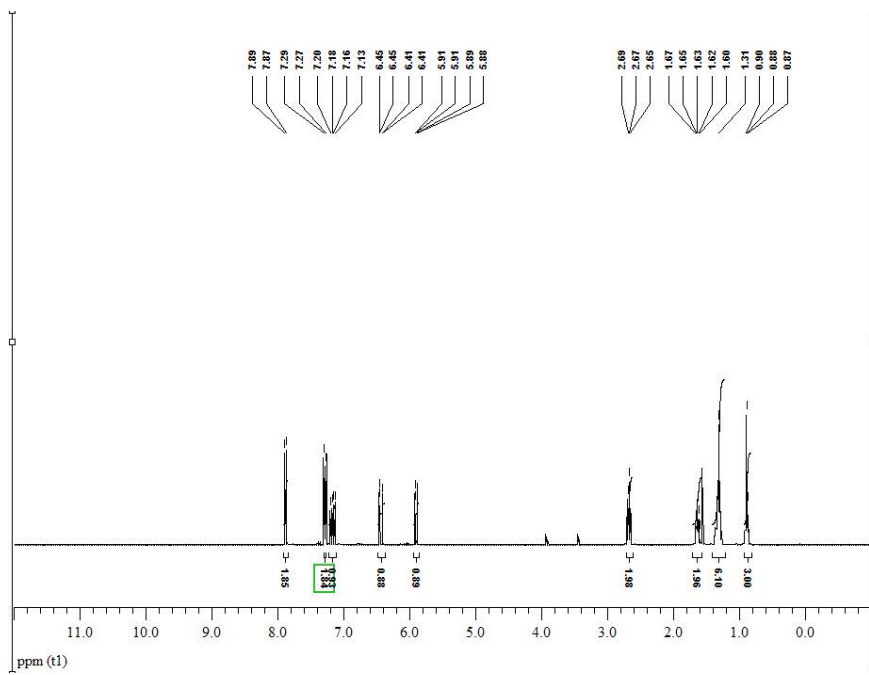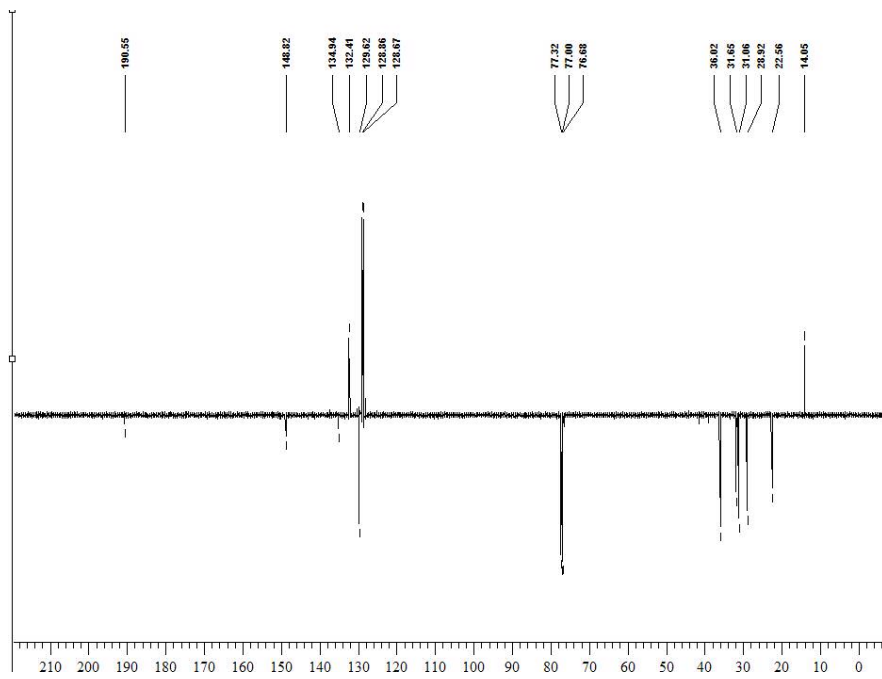

Sample: 1 Vial:2,2,0 File:LAAG123\_TRA4\_2 Page: 1  
 Date: 05-Apr-2006 Time: 17:04:40

3: UV Detector: TIC (1) 2.882e+1  
 Range: 2.881e+1

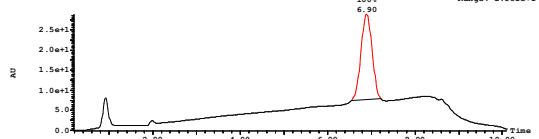

| Peak Number | Time | AreaAbs | Area%Total | Width | Height   | Mass Found |
|-------------|------|---------|------------|-------|----------|------------|
| 1           | 6.90 | 6e+006  | 100.00     | 0.7   | 2.1e+007 |            |

1: (Time: 6.90) 8.504e+1 AU 1: (Time: 6.90) 7.8e+006

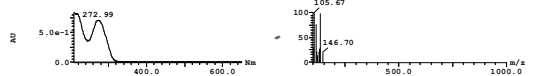

1: (Time: 6.90) 9.3e+007

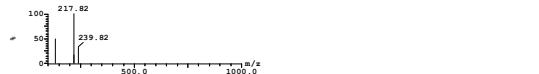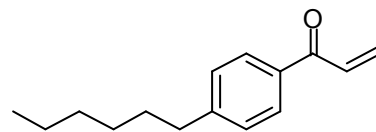

1-(4-hexylphenyl)prop-2-en-1-one

### Spectral data 4a

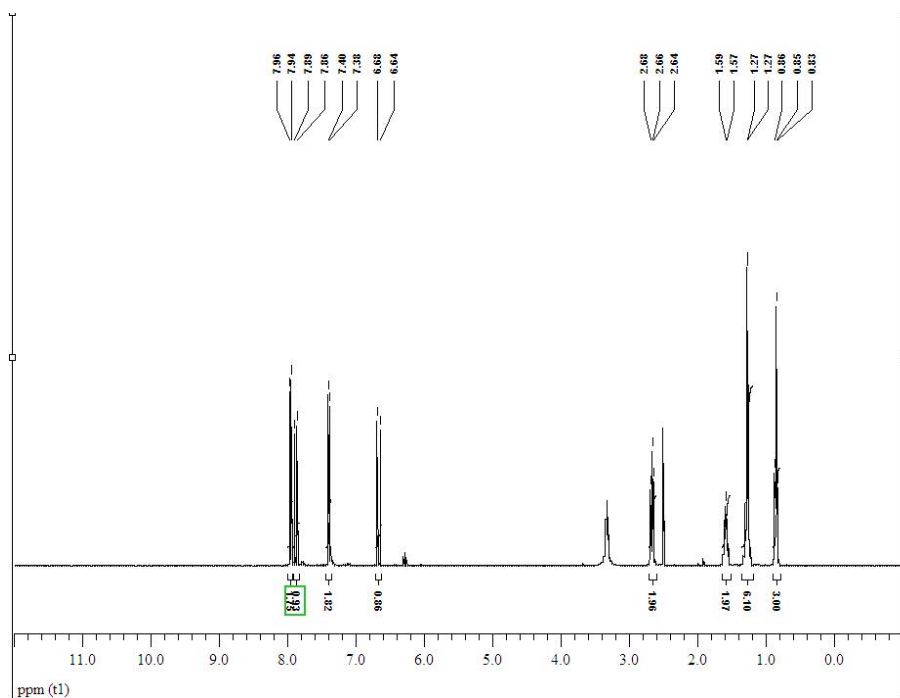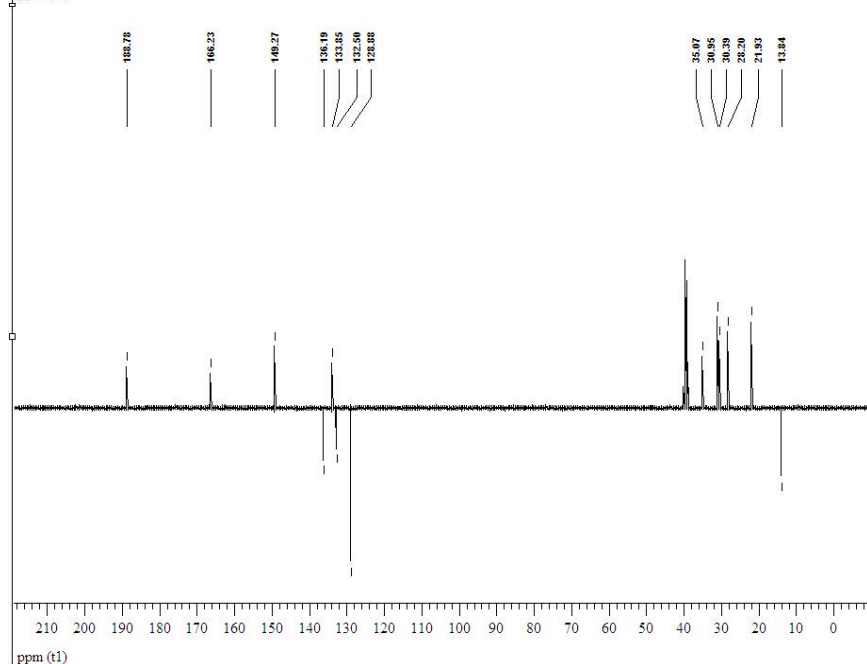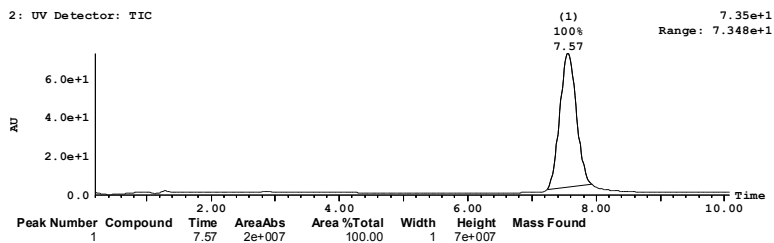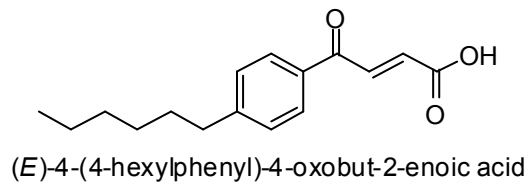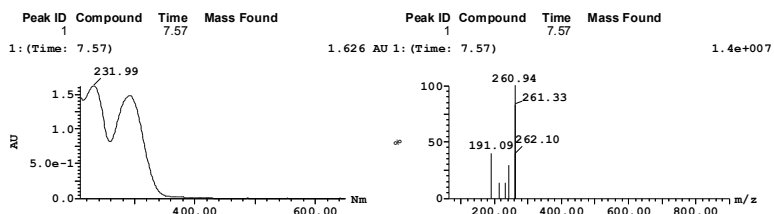

Spectral data 4b

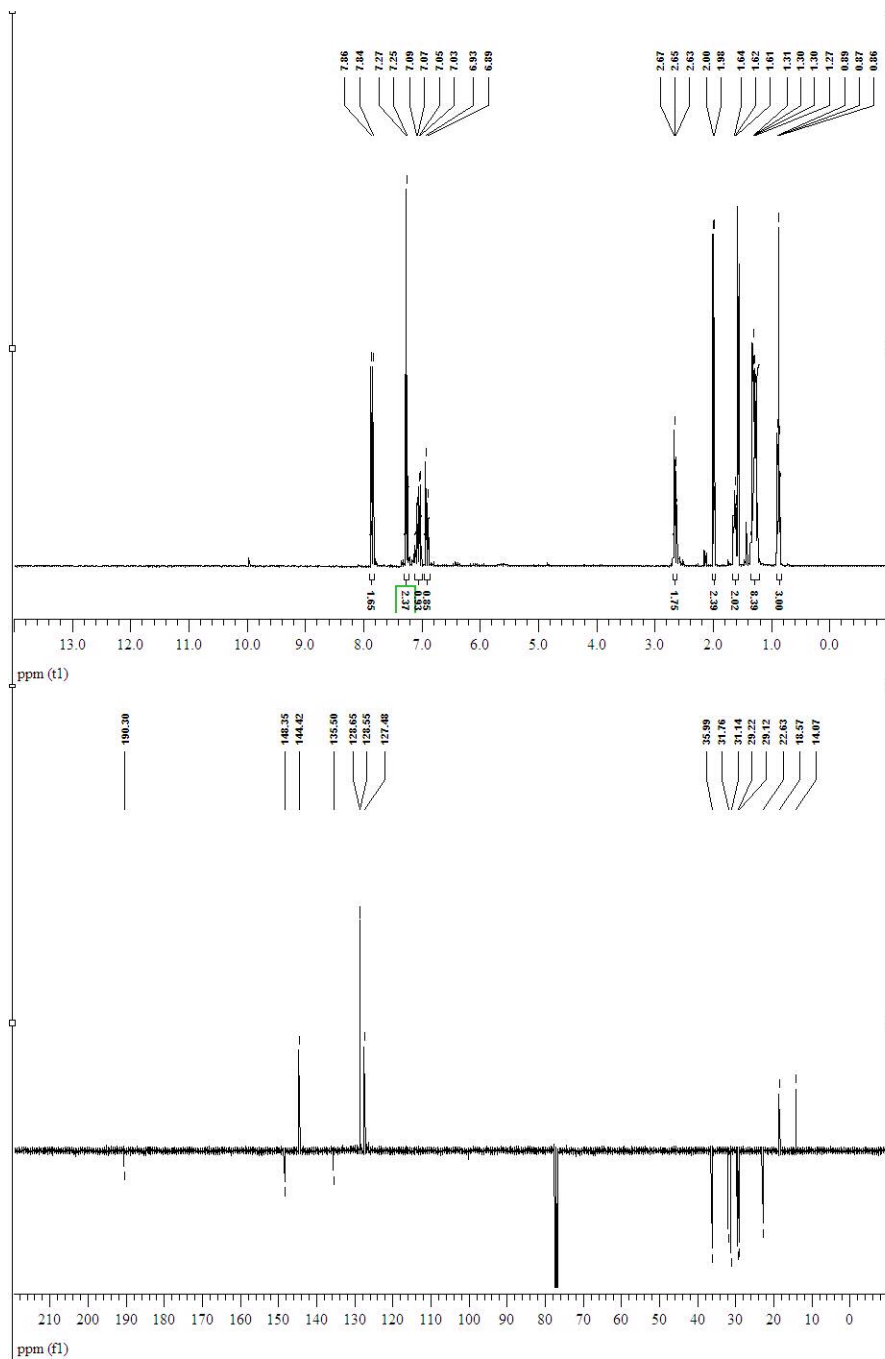

Page 1

Sample: 3  
Date:02-Oct-2006

Vial:1;5,F  
Time:11:14:21

File:LAAH171\_3

2: UV Detector: TIC

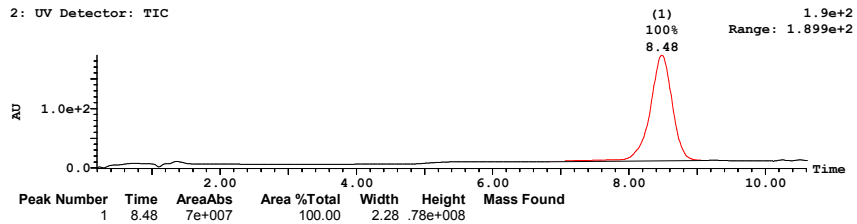

1: (Time: 8.48)

3.614 AU 1: (Time: 8.48)

7.8e+007

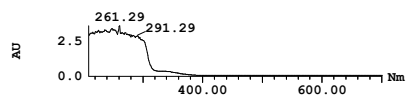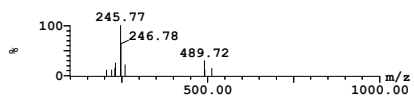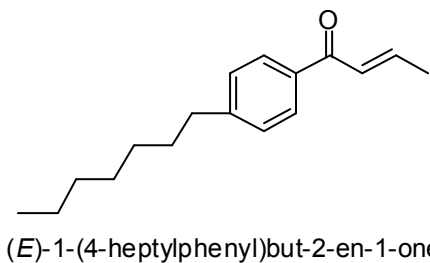

### Spectral data 4c

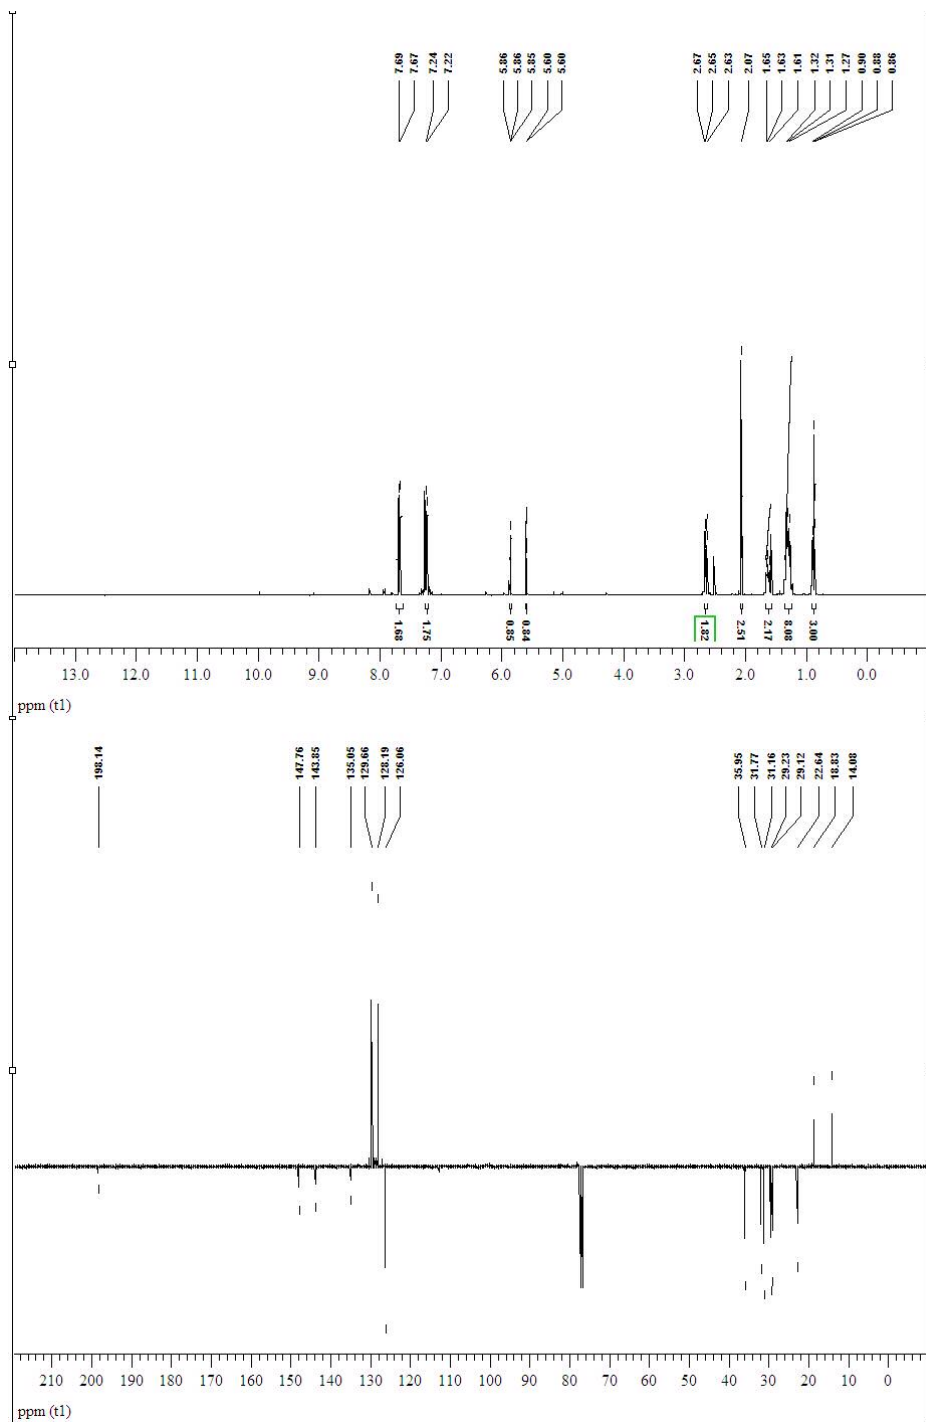

Sample: 4  
Date: 02-Oct-2006  
Vial: 1:6,F  
Time: 11:25:45  
File: LAAH171\_4

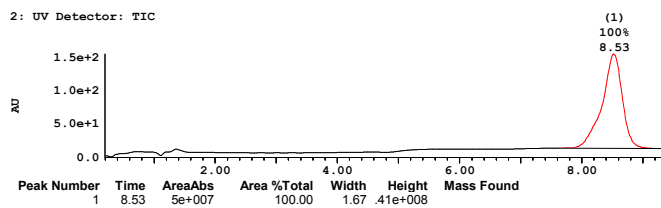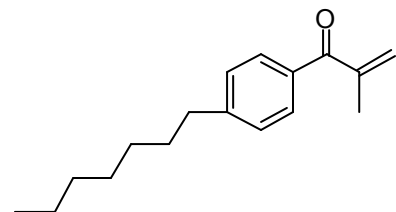

1-(4-heptylphenyl)-2-methylprop-2-en-1-one

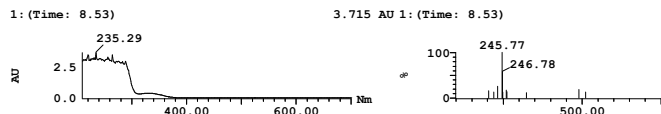

Spectral data 4d

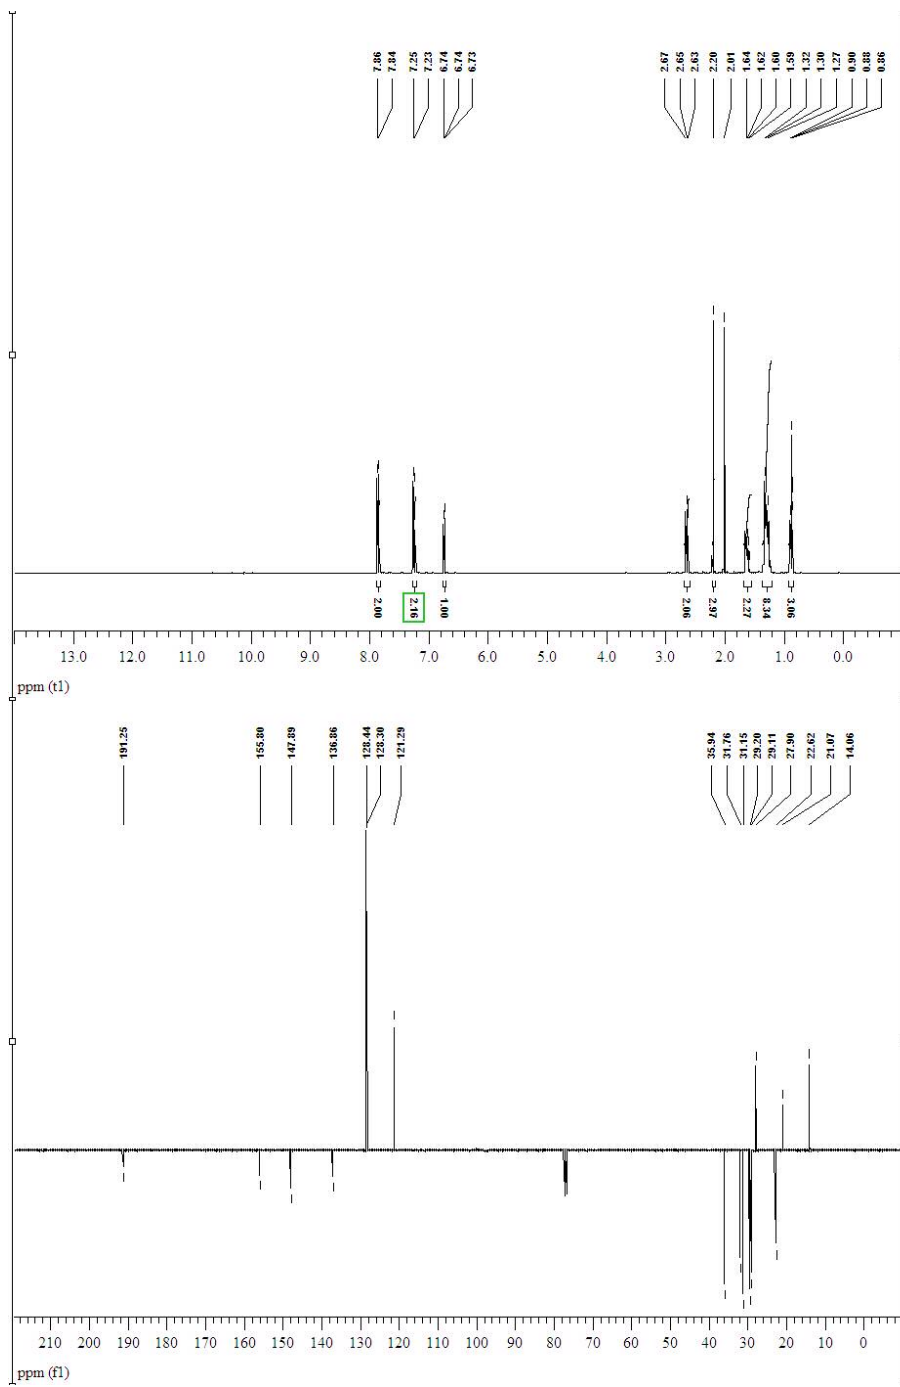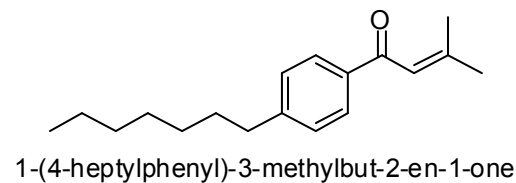

Sample: 1 Vial: 1.3.F File: LAAH171\_1 Page 1  
 Date: 02-Oct-2006 Time: 10:50:36

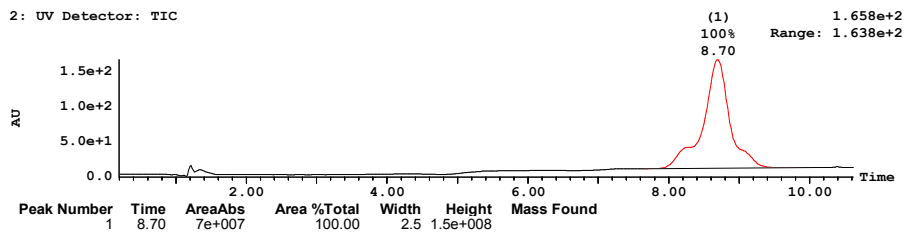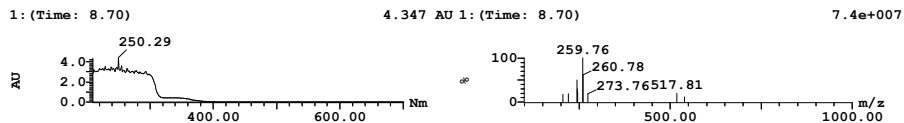

Spectral data 4e

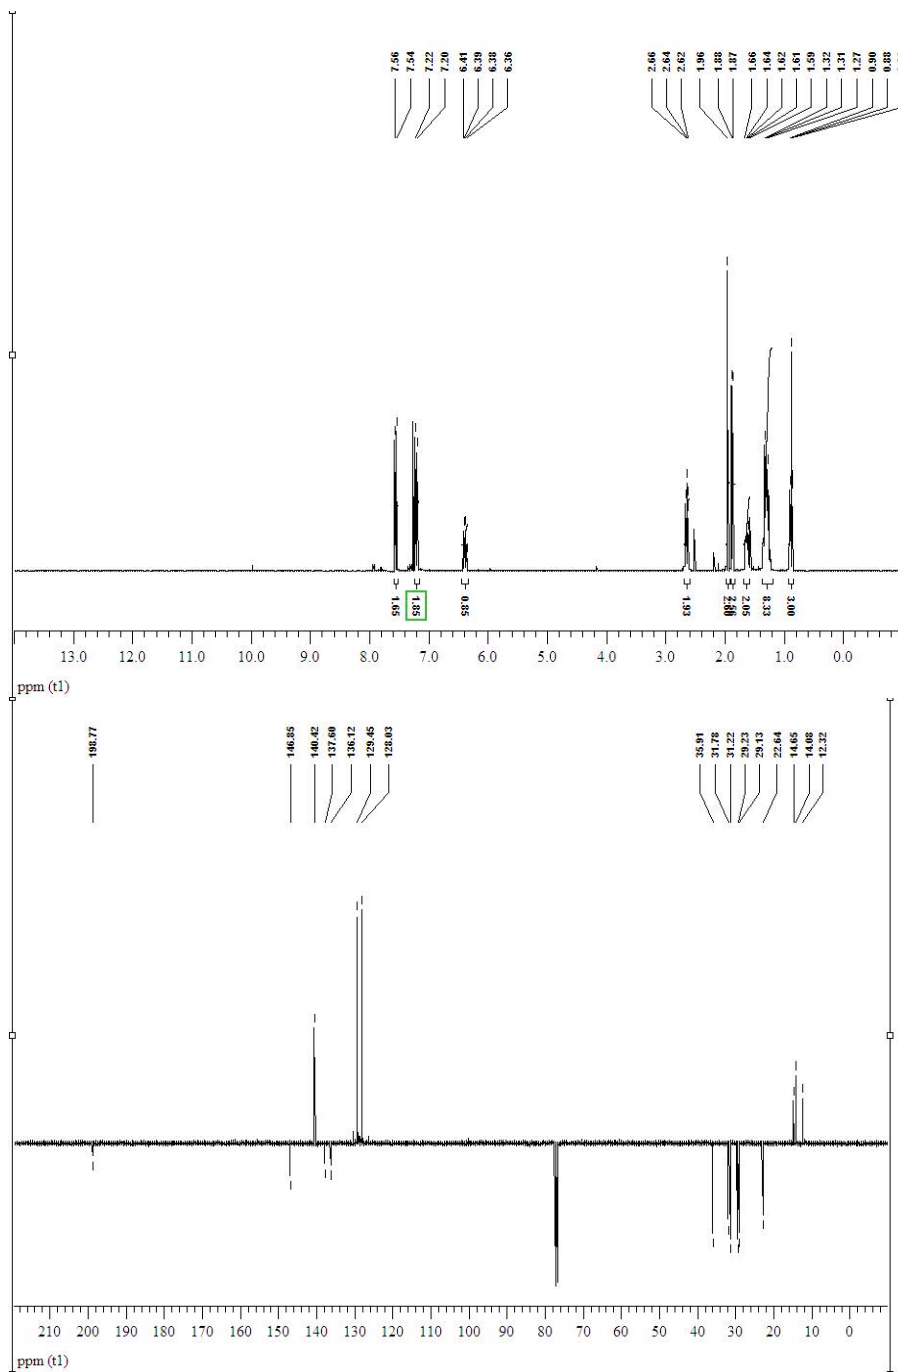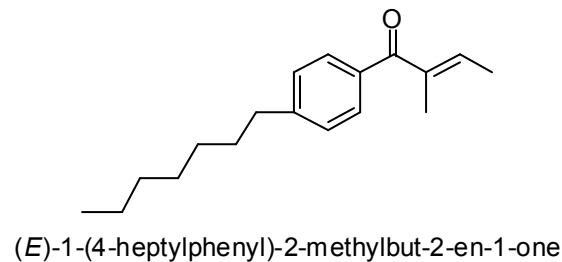

Sample: 2  
 Date: 02-Oct-2006  
 Vial: 1;4,F  
 Time: 11:02:58  
 File: LAAH171\_2  
 Page 1

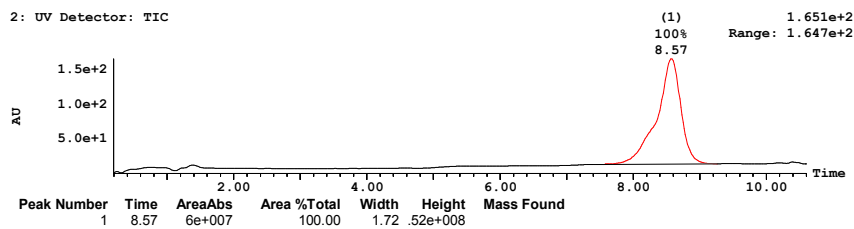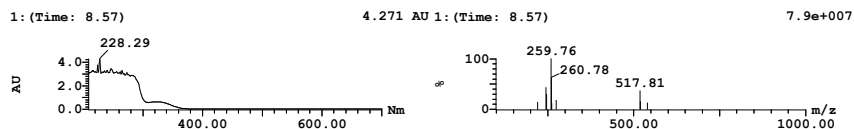

**Spectral data 4f**



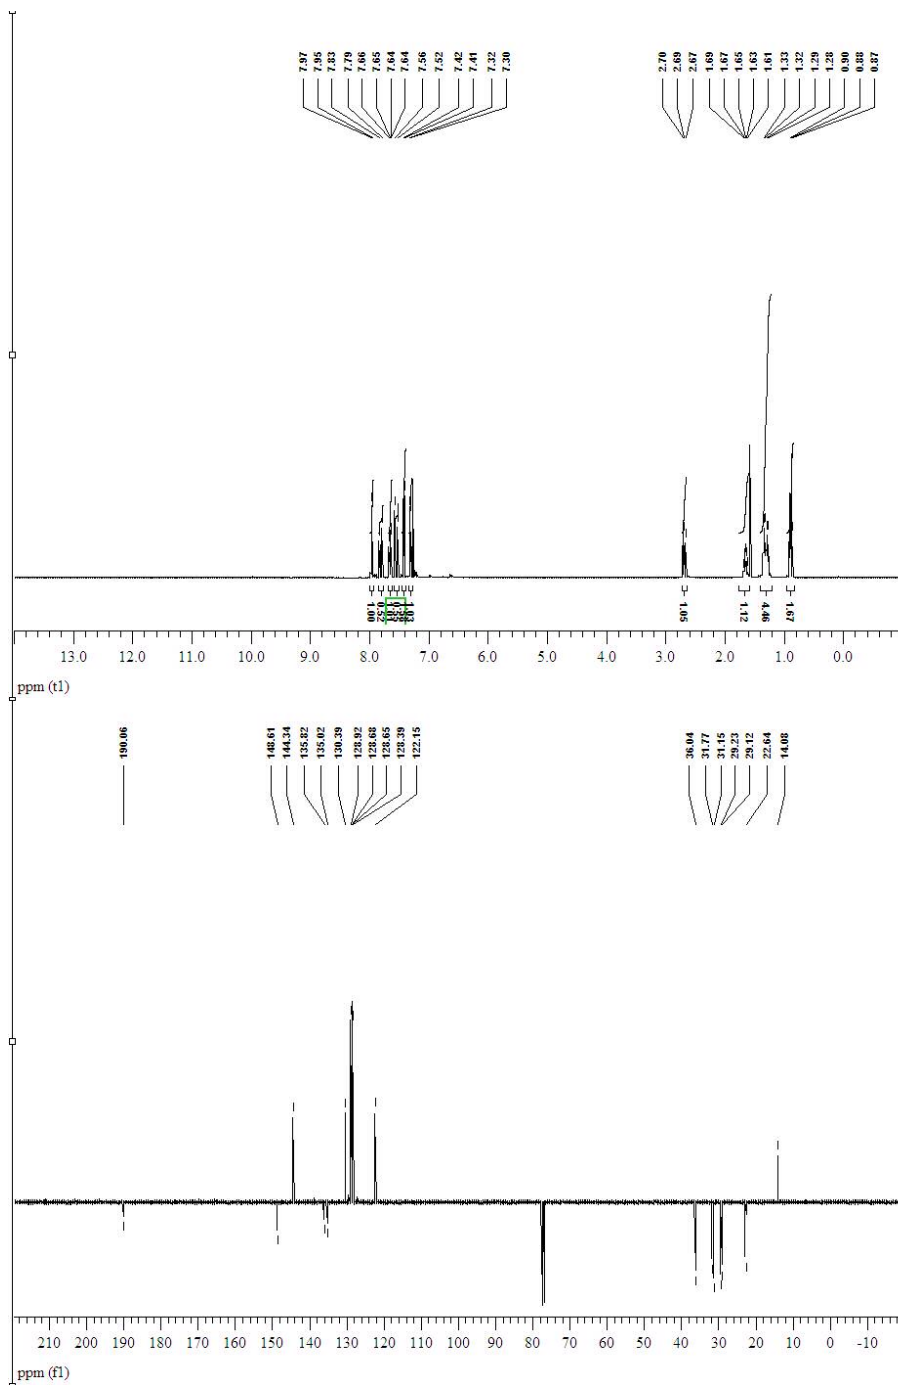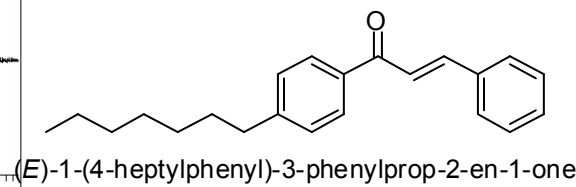

Sample: 1 Vial: 1:3.F File: LAAH171\_5 Page 1  
 Date: 03-Oct-2006 Time: 10:58:45

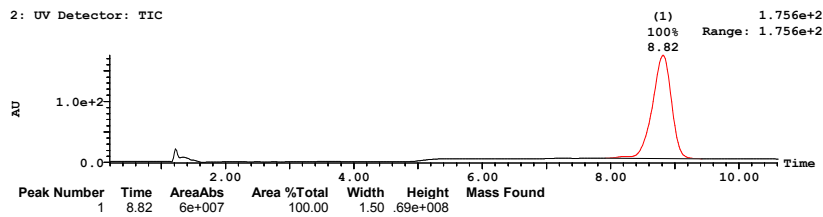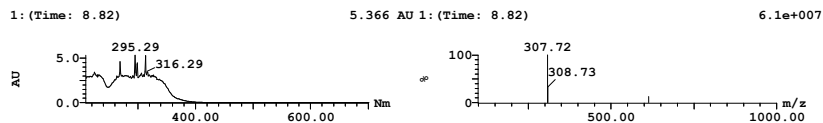

Spectral data 4g

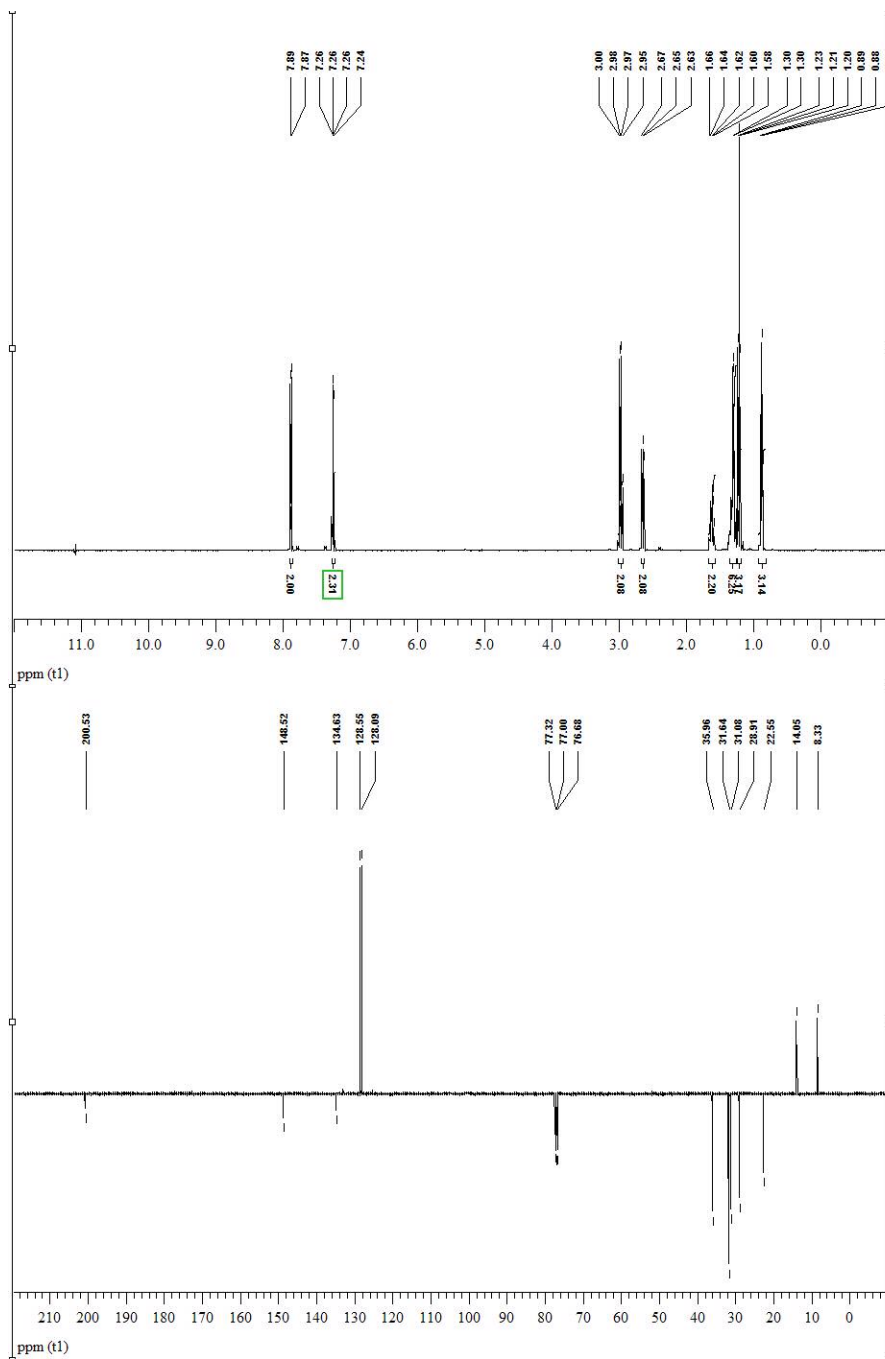

Sample: 1  
Date: 23-Apr-2006  
Vial: 3:1,C  
Time: 16:32:38  
File: LAAG37\_5  
Page 1

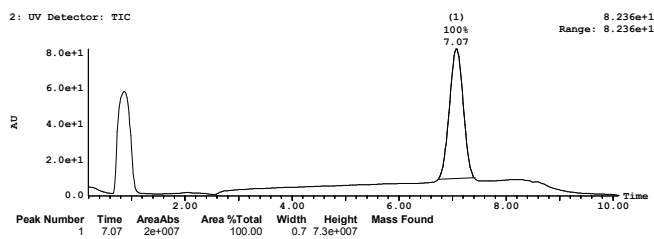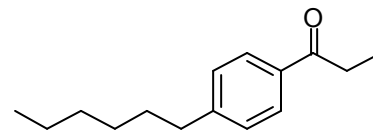

1-(4-hexylphenyl)propan-1-one

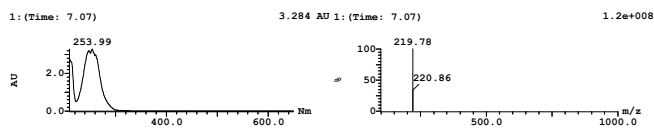

# Spectral data 5b

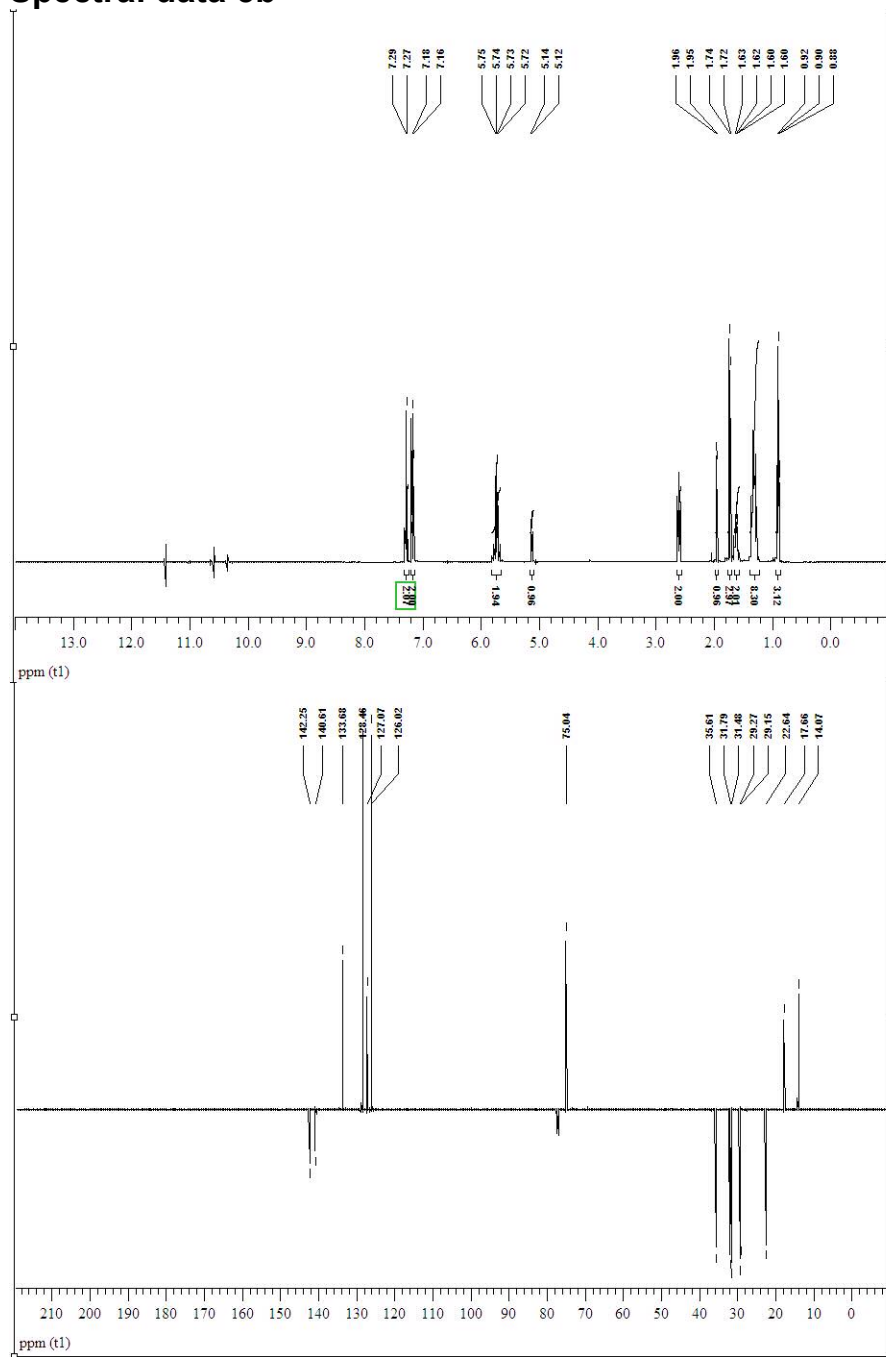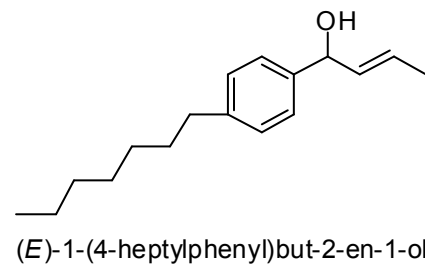

Page 1  
 Sample: 3  
 Date: 26-Sep-2006  
 Vial: 3.3.C  
 Time: 14:06:42  
 File: LAAH165\_3\_1

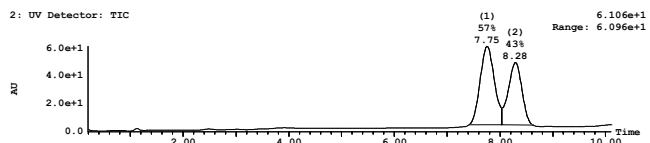

| Peak Number | Time | AreaAbs | Area %Total | Width | Height   | Mass Found |
|-------------|------|---------|-------------|-------|----------|------------|
| 1           | 7.75 | 2e+007  | 56.66       | 0.6   | 5.6e+007 |            |
| 2           | 8.28 | 1e+007  | 43.34       | 0.6   | 4.5e+007 |            |

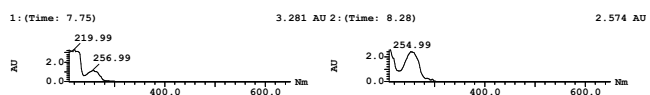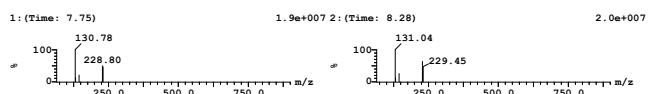

# Spectral data 5c

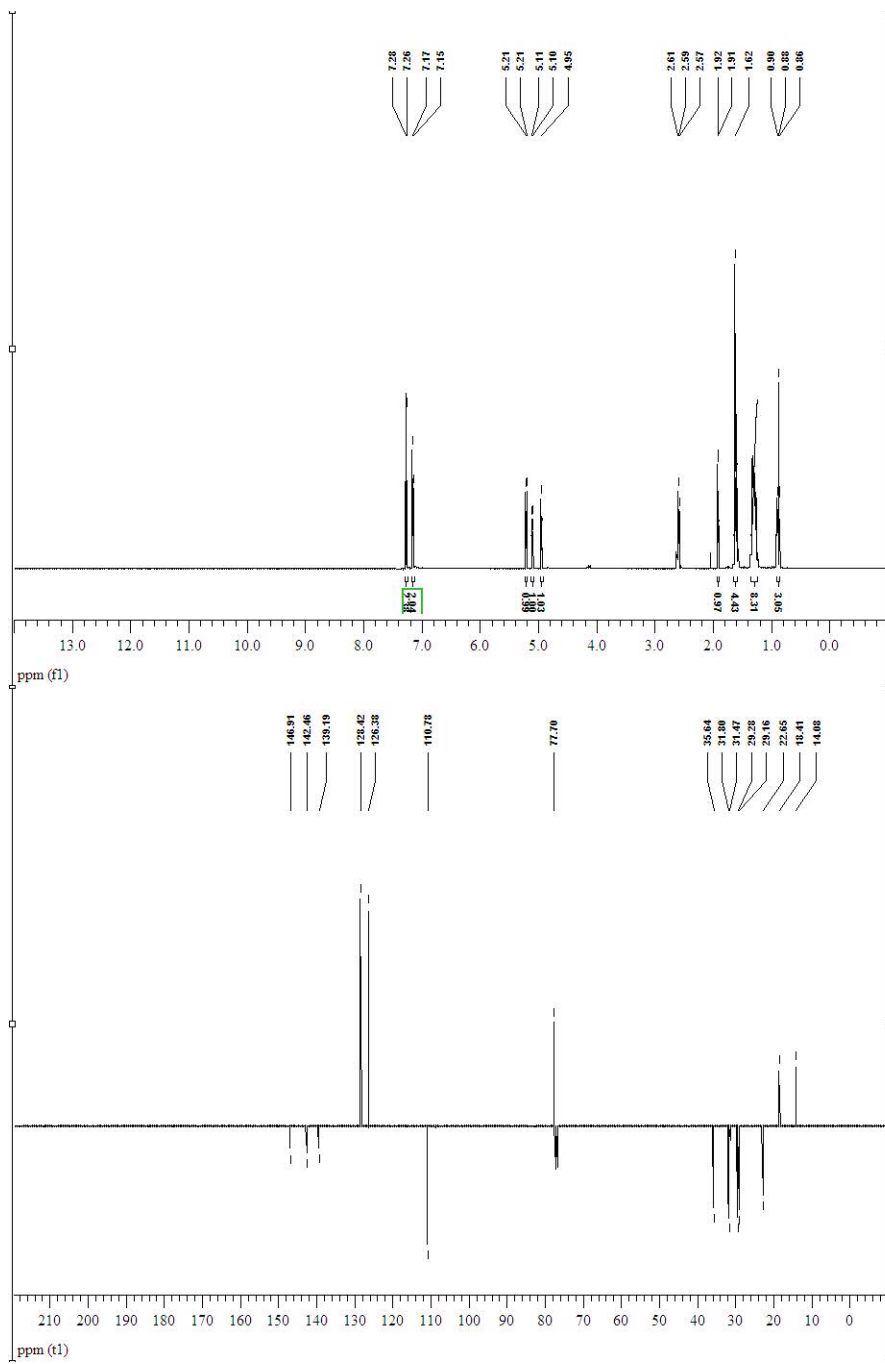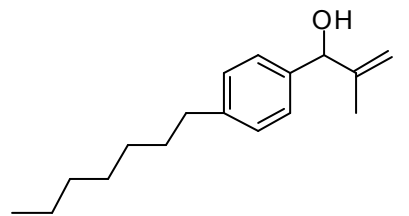

1-(4-heptylphenyl)-2-methylprop-2-en-1-ol

Page 1

Sample: 4  
Date: 26-Sep-2006

Vial: 3:4.C  
Time: 14:17:28

File: LAAH165\_4\_1

2: UV Detector: TIC

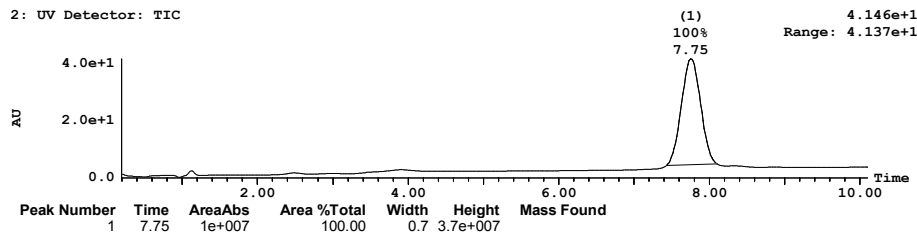

1: (Time: 7.75)

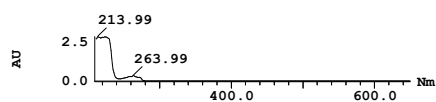

2.847 AU 1: (Time: 7.75)

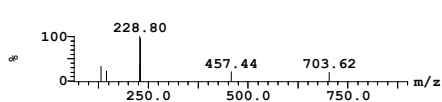

Spectral data 5d

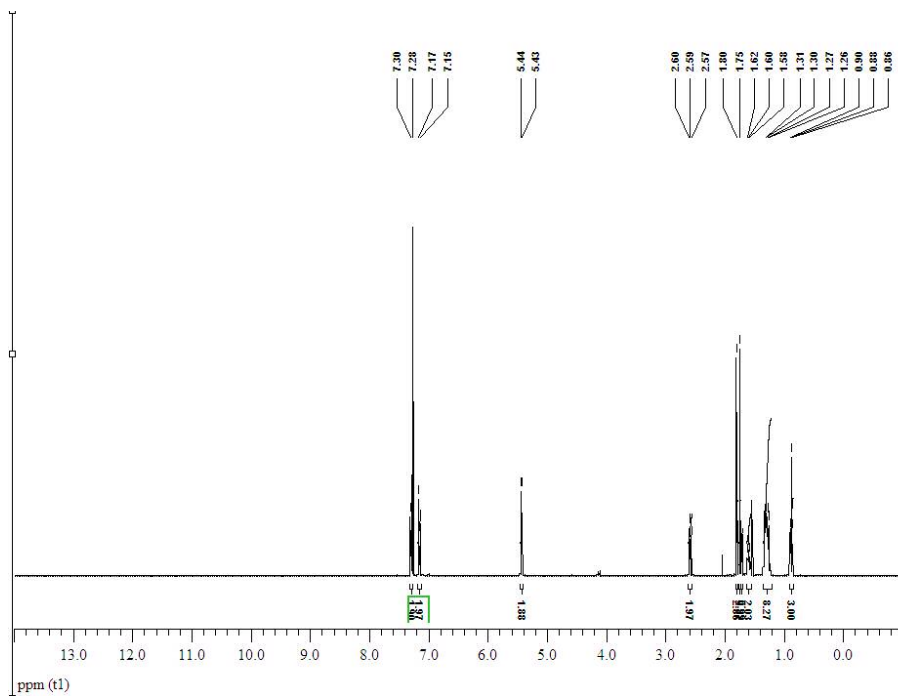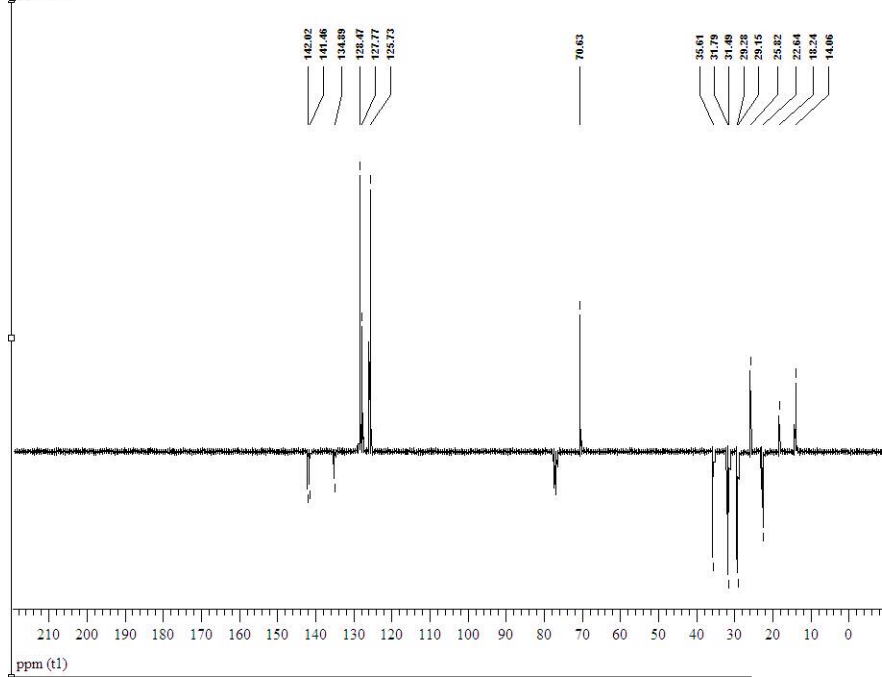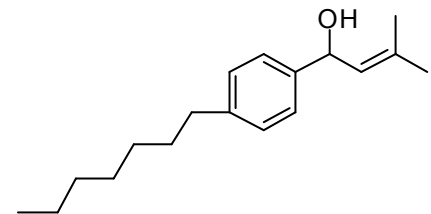

1-(4-heptylphenyl)-3-methylbut-2-en-1-ol

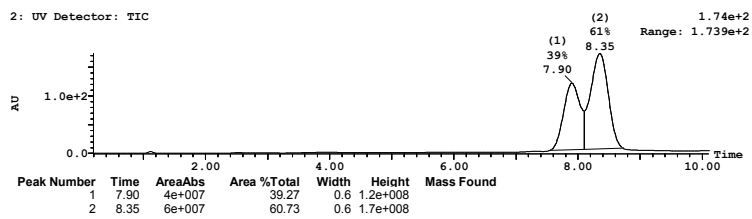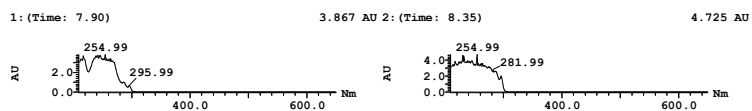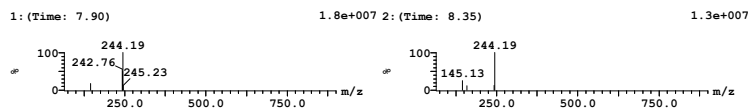

Spectral data 5e

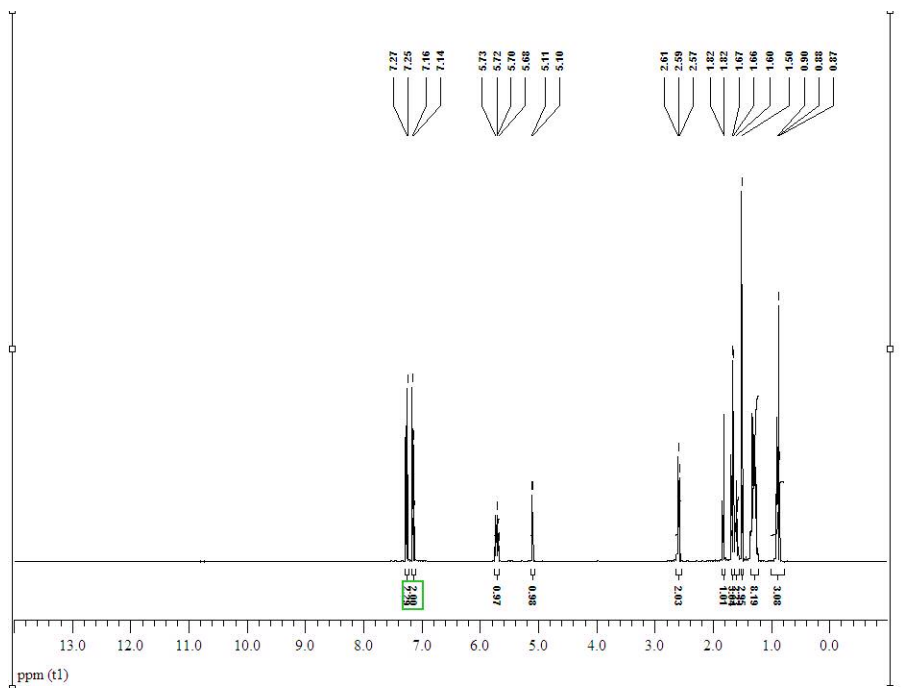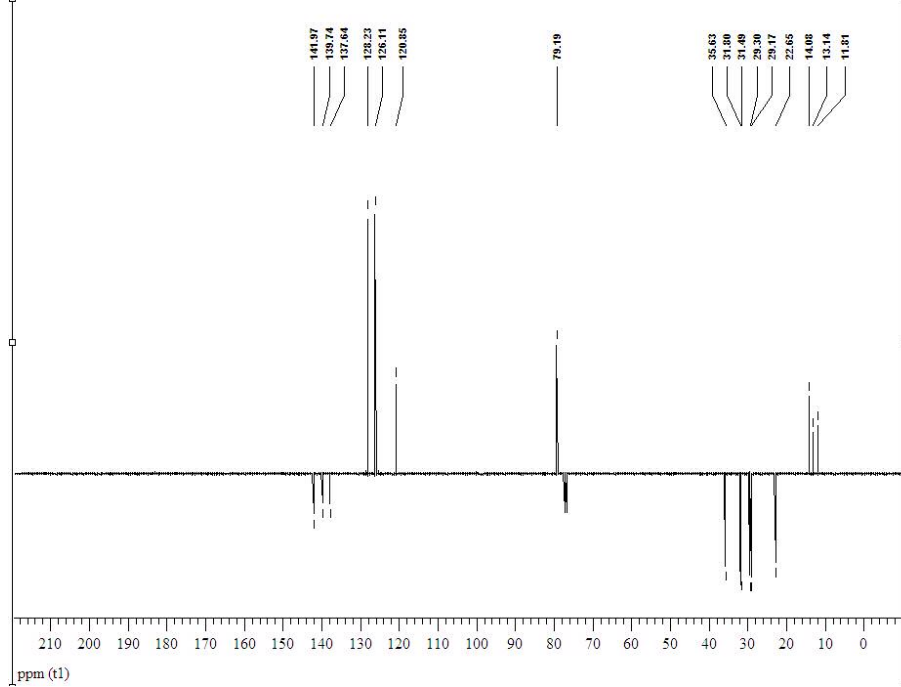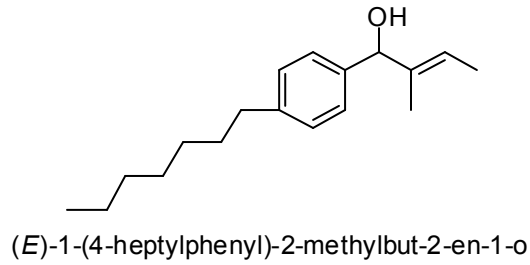

Sample: 2 Vial:3:2.C File:LAAH165\_2\_1 Page 1  
 Date:26-Sep-2006 Time:13:55:57

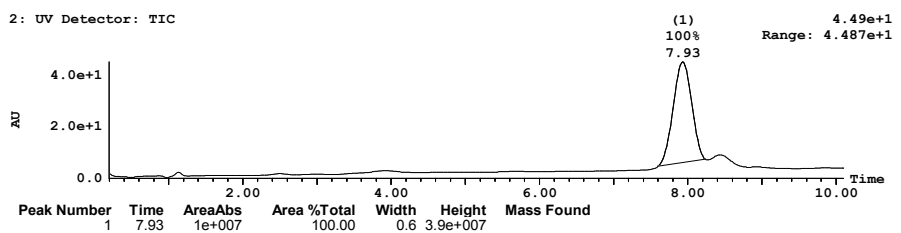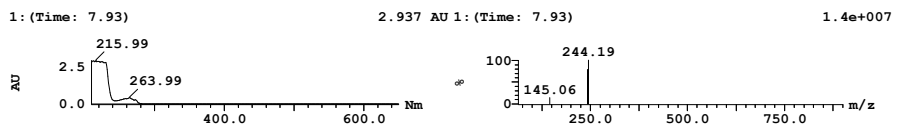

Spectral data 5f

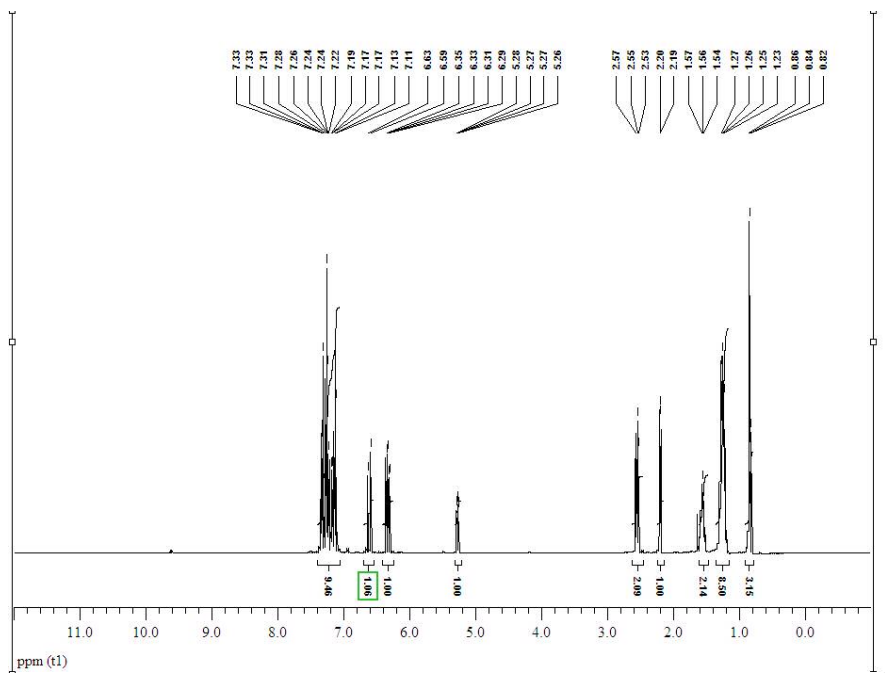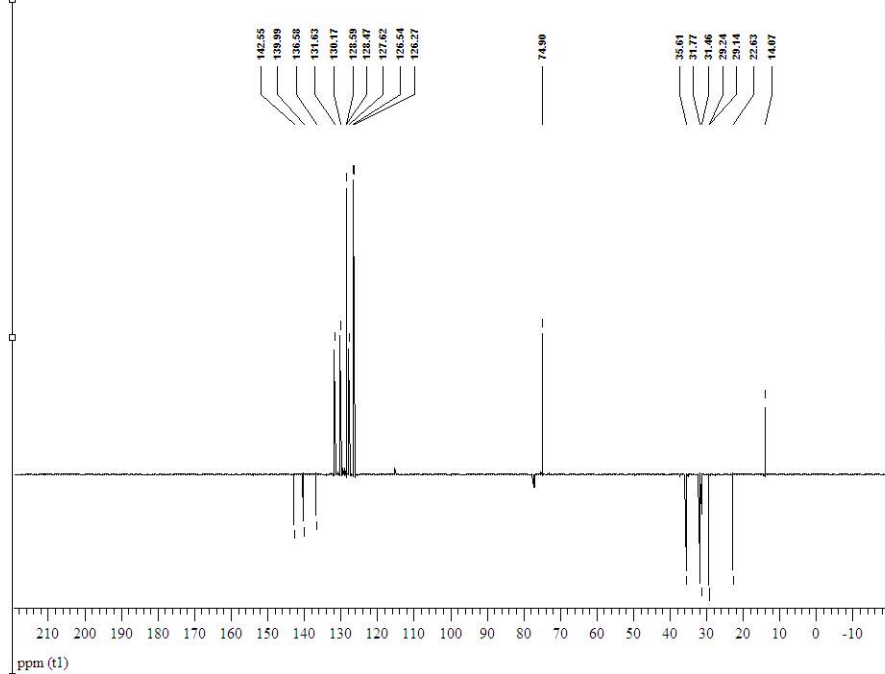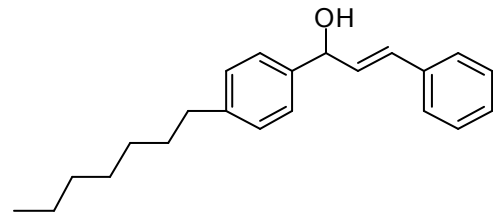

(E)-1-(4-heptylphenyl)-3-phenylprop-2-en-1-ol

Sample: 5 Vial: 3.5.C Date: 26-Sep-2006 Time: 14:28:14 File: LAAH165\_5\_1 Page 1

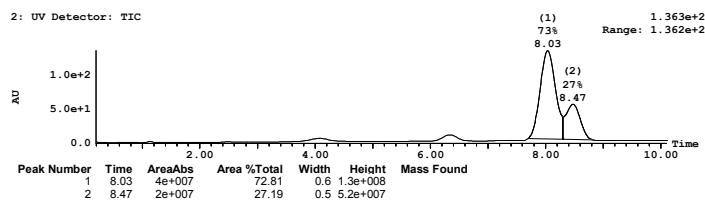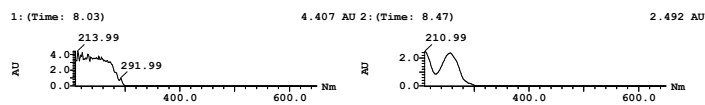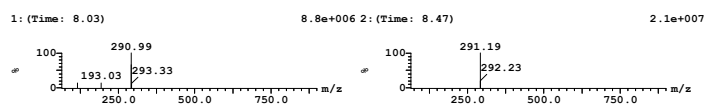

Spectral data 6a

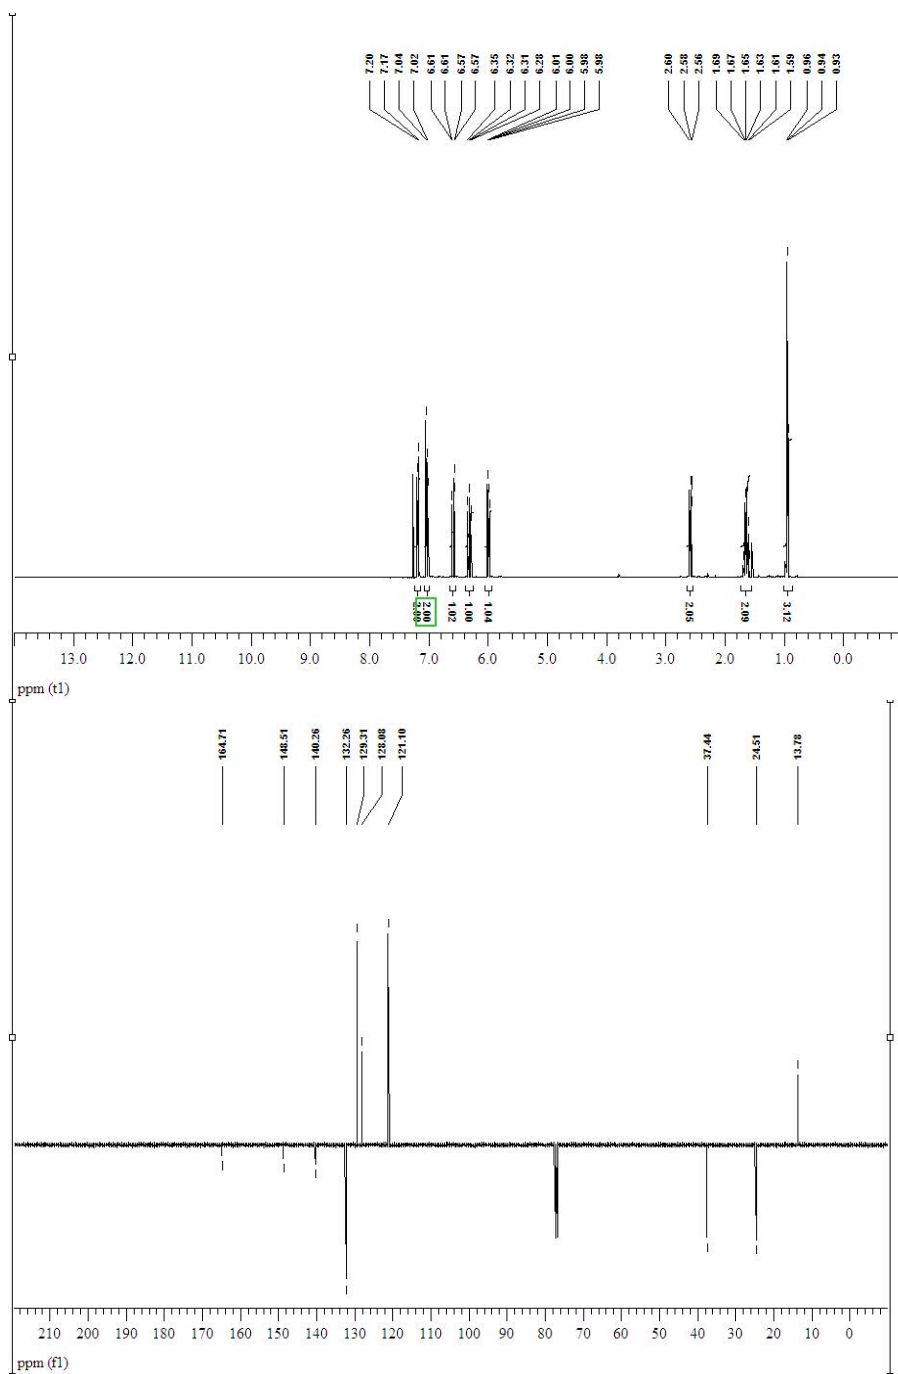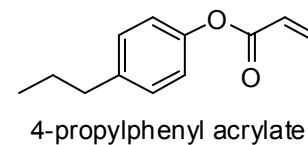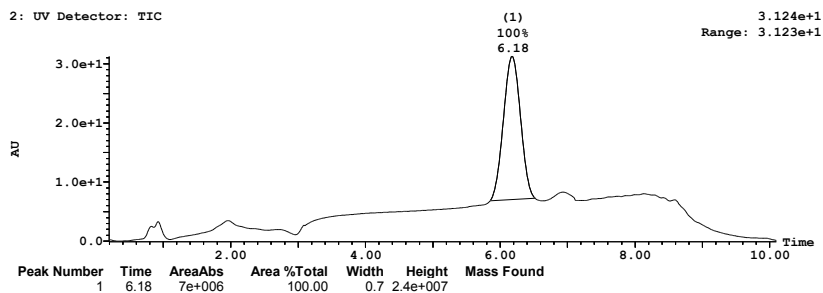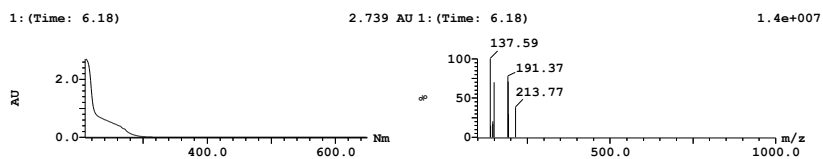

Spectral data 6b



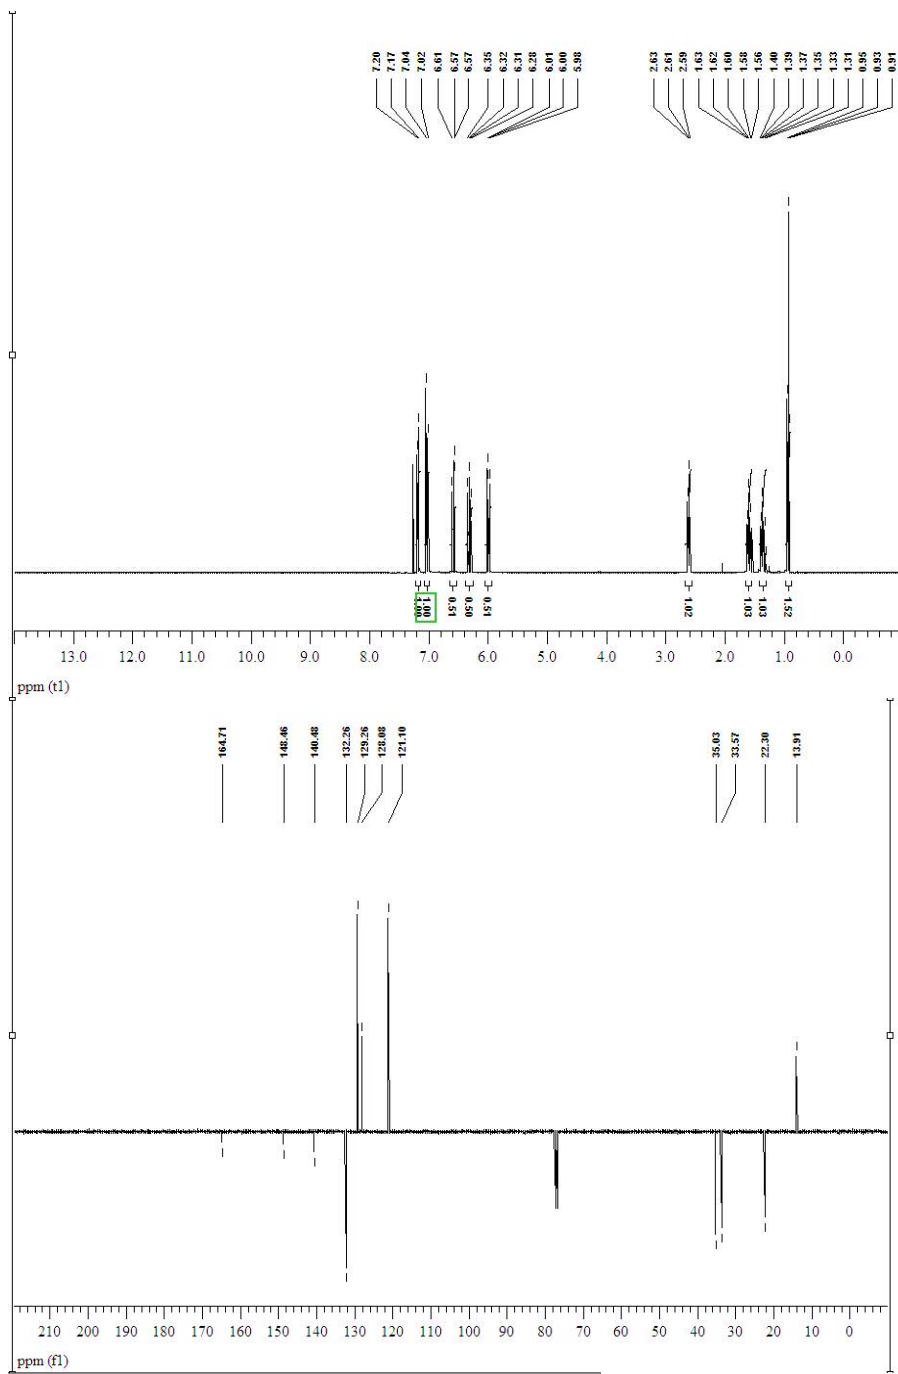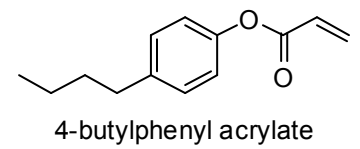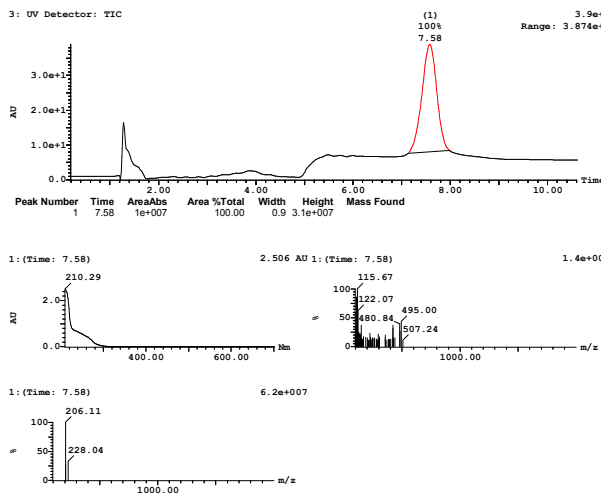

Spectral data 6c

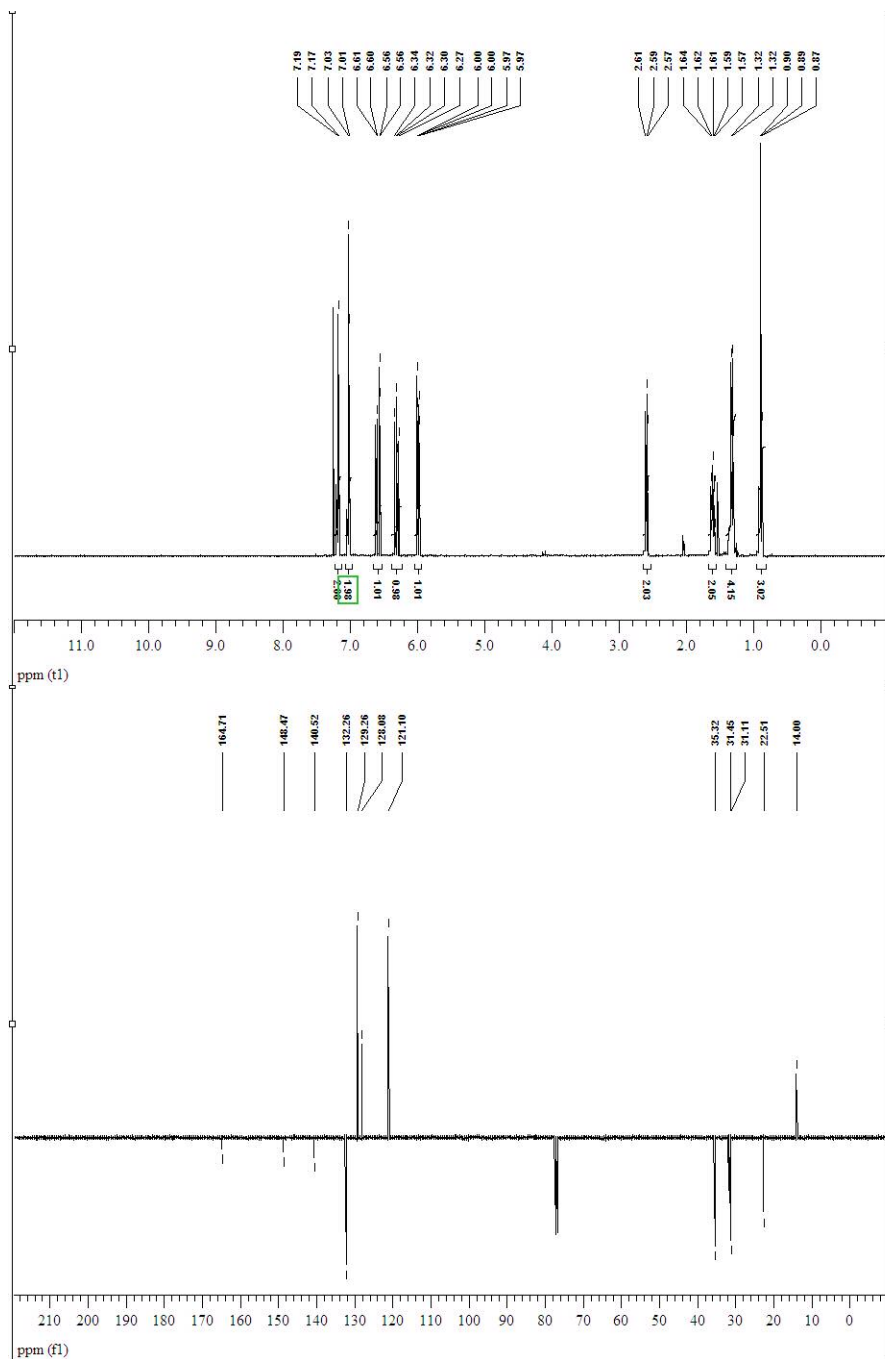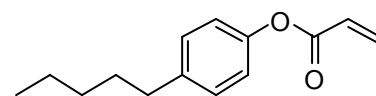

4-pentylphenyl acrylate

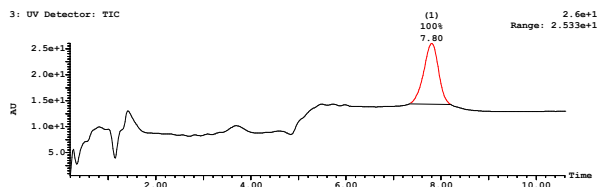

| Peak Number | Time | AreaAbs | Area %Total | Width | Height   | Mass Found |
|-------------|------|---------|-------------|-------|----------|------------|
| 1           | 7.80 | 4e+006  | 100.0       | 0.9   | 1.2e+007 |            |

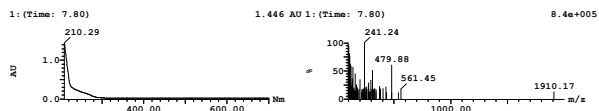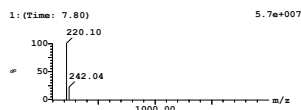

Spectral data 6d

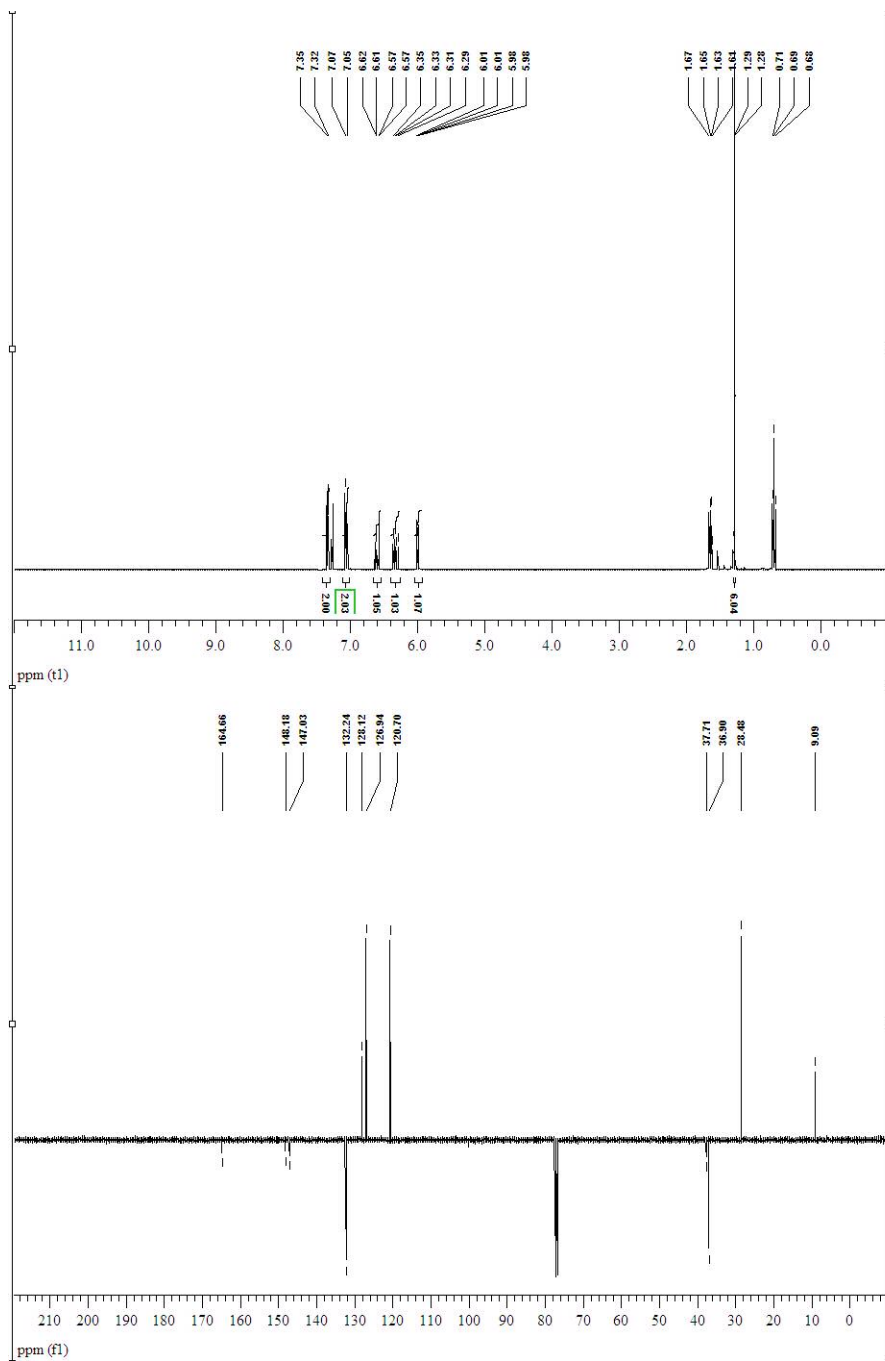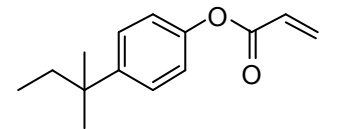

4-*tert*-pentylphenyl acrylate

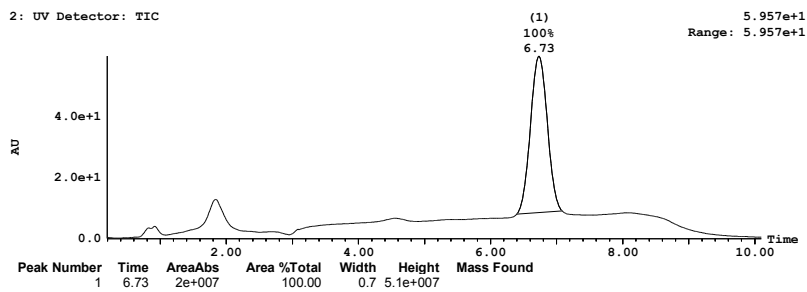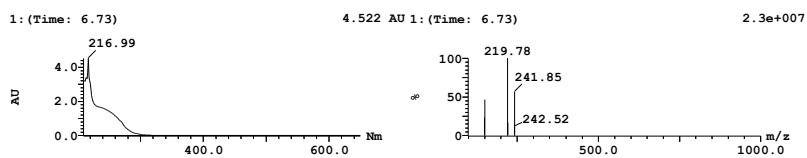

Spectral data 6e

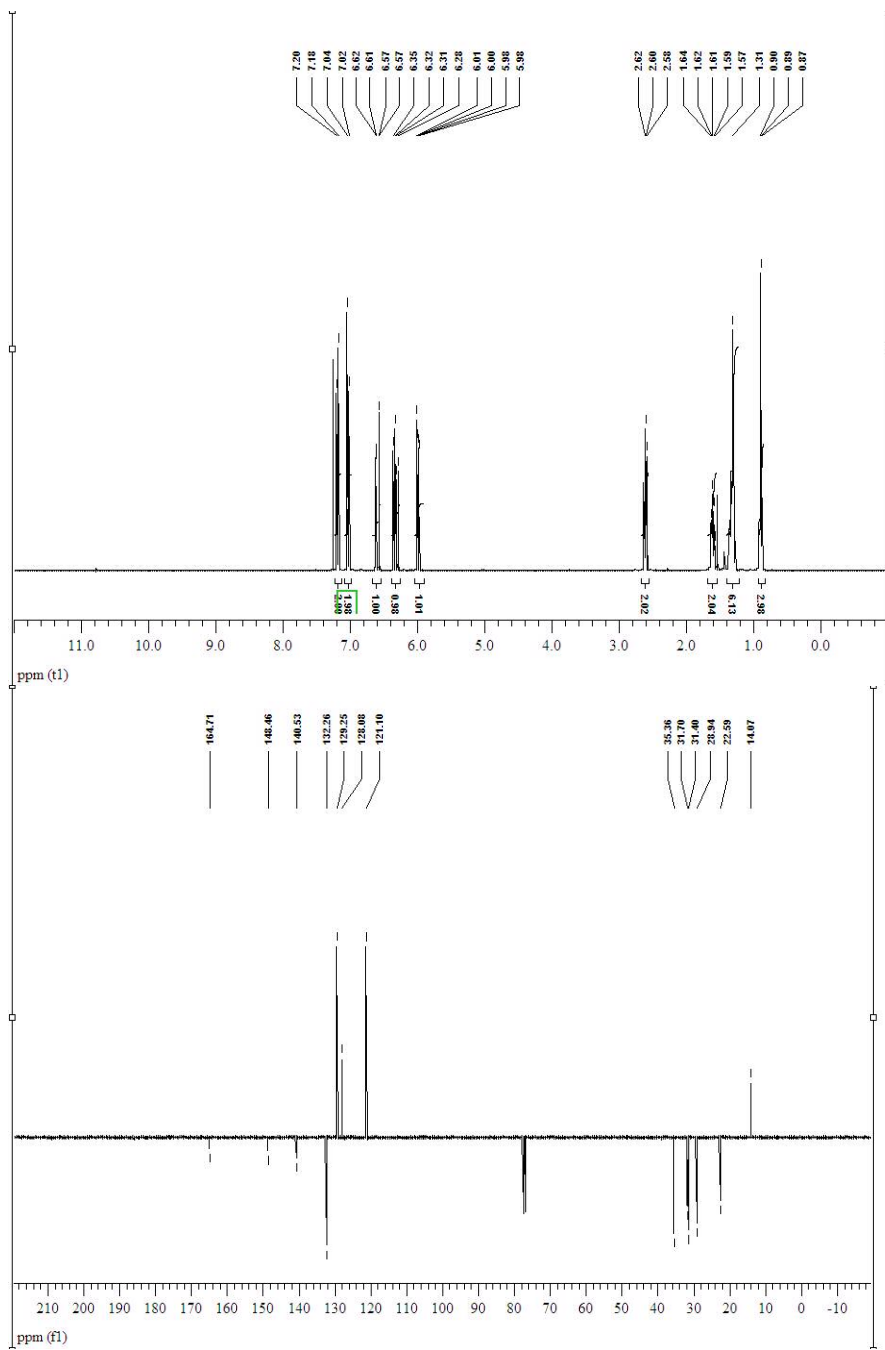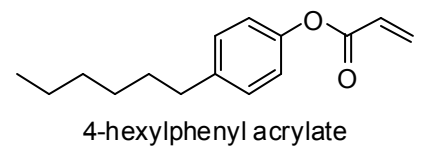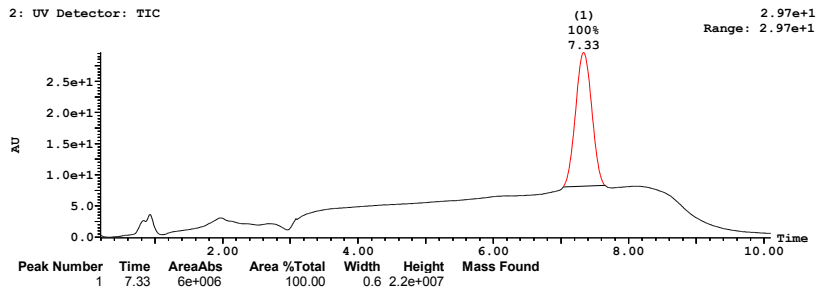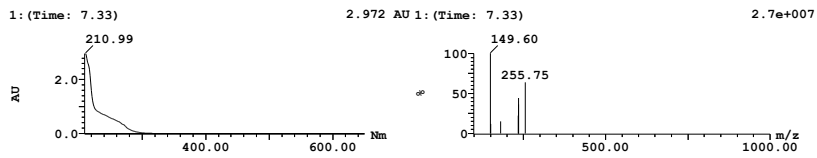

Spectral data 6f

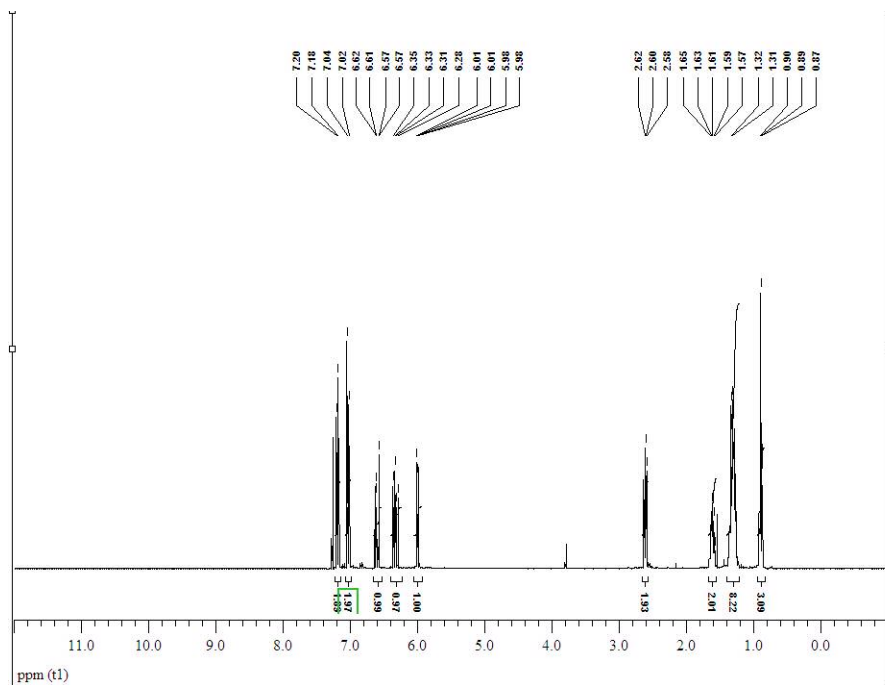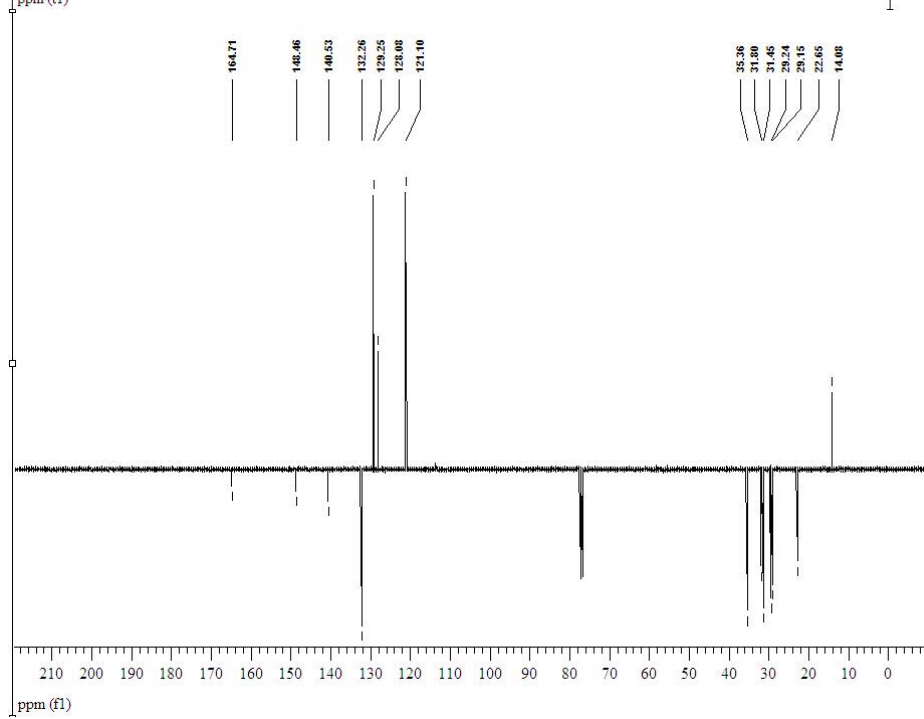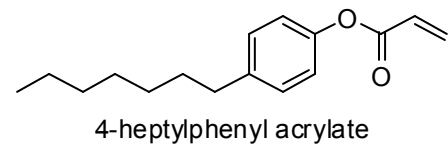

2: UV Detector: TIC

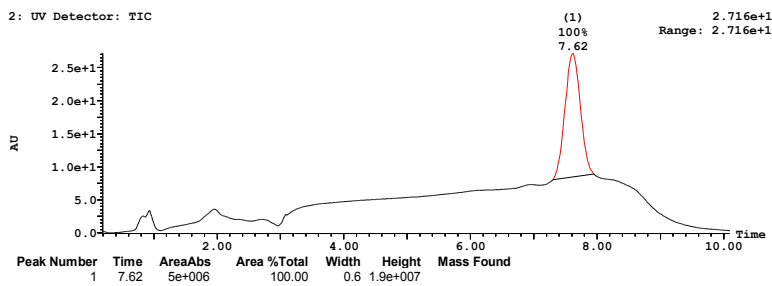

1: (Time: 7.62)

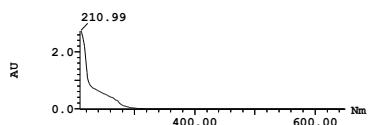

2: 728 AU 1: (Time: 7.62)

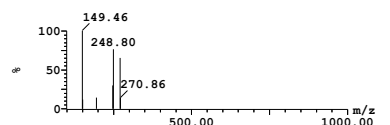

### Spectral data 6g

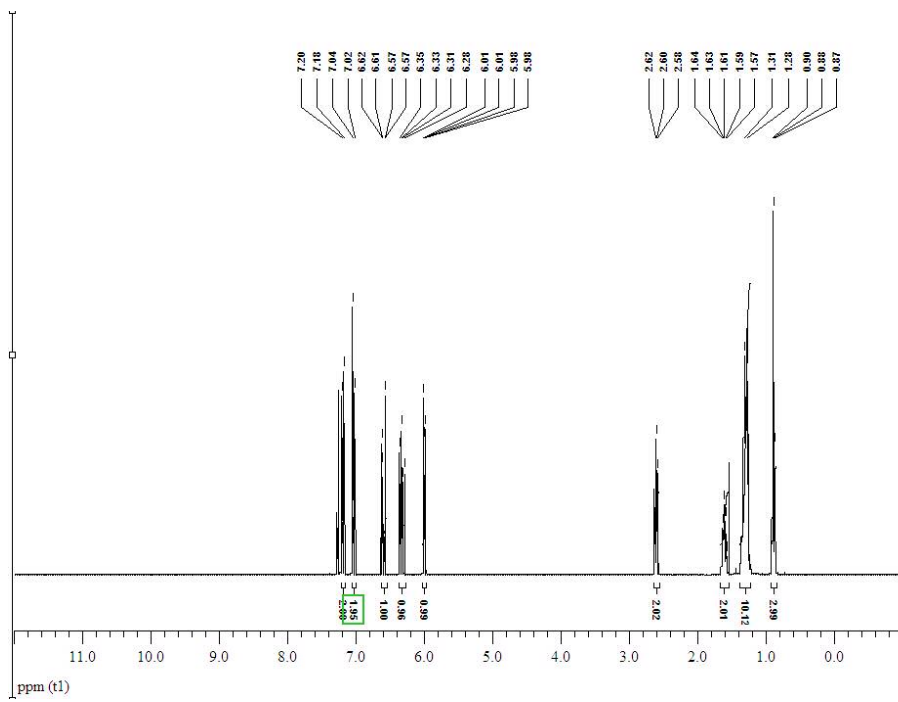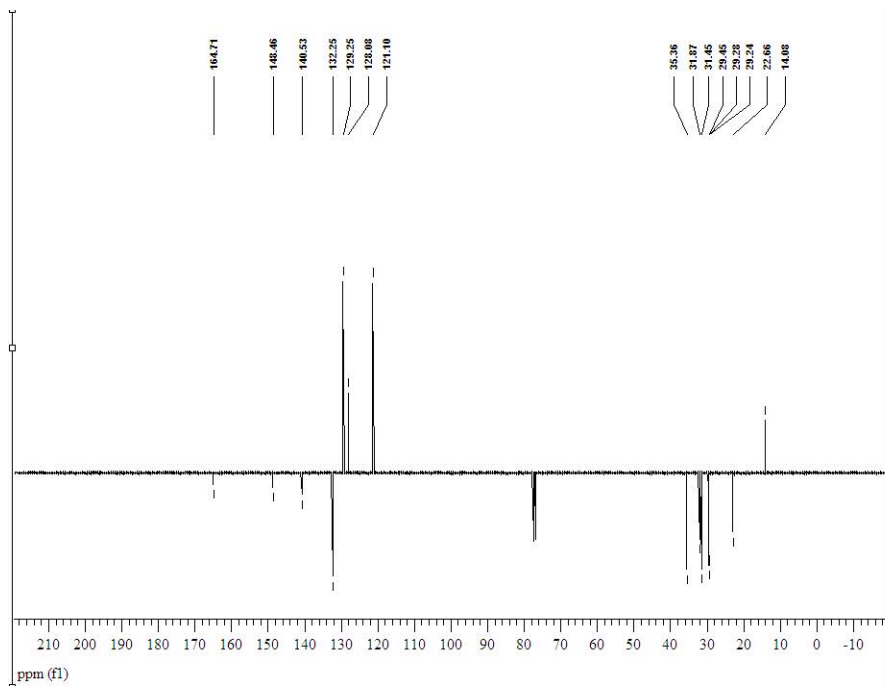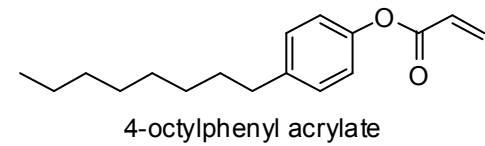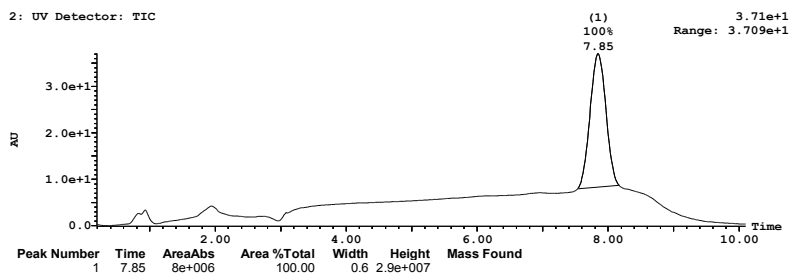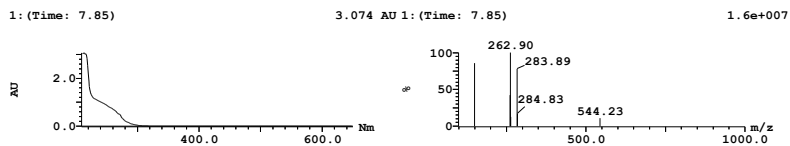

Spectral data 6h

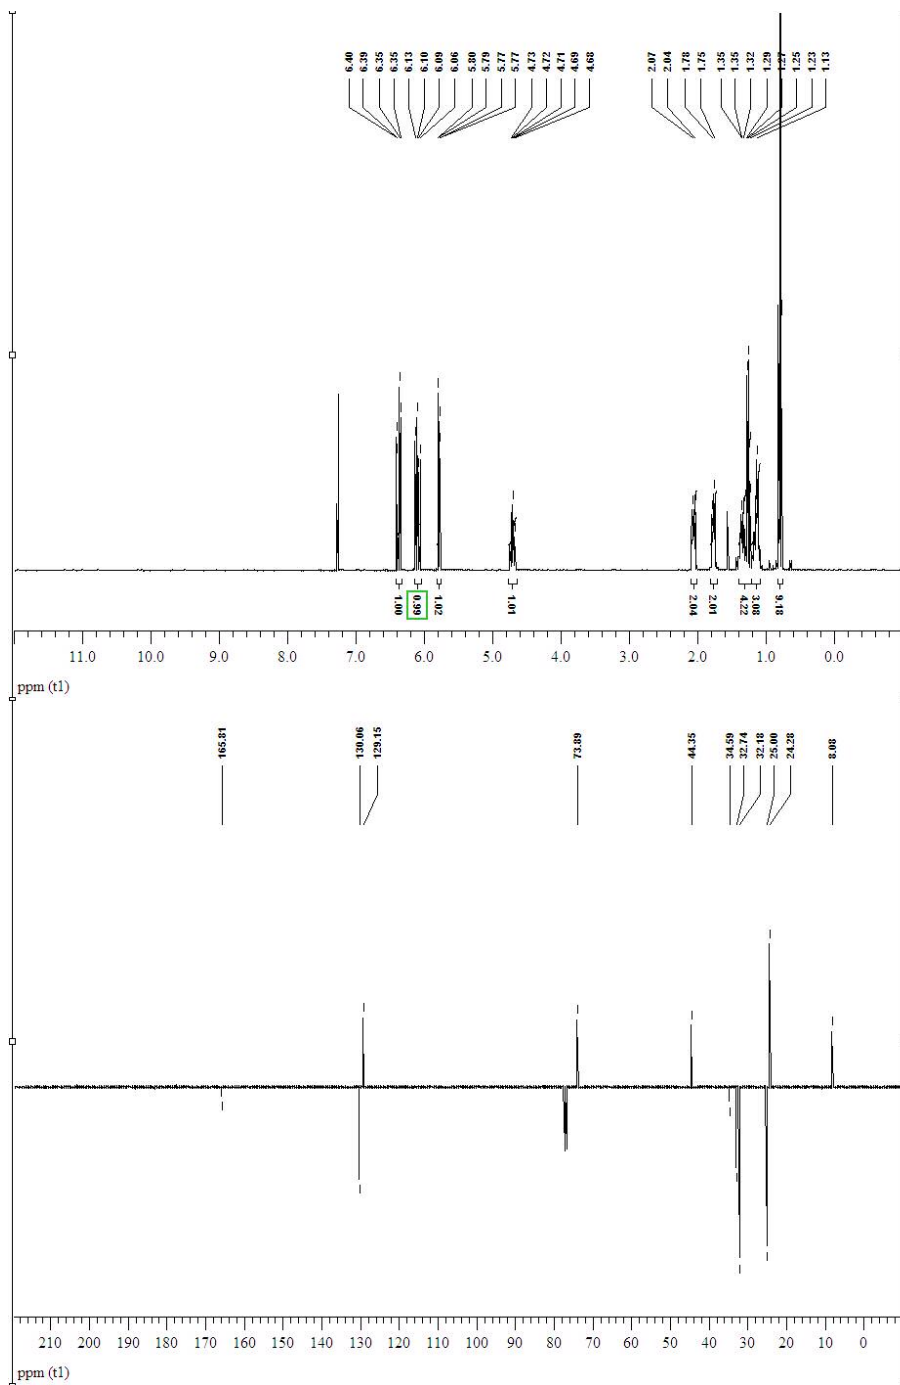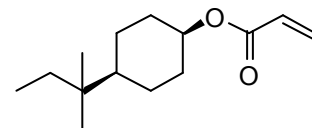

(*trans*)-4-*tert*-pentylcyclohexyl acrylate

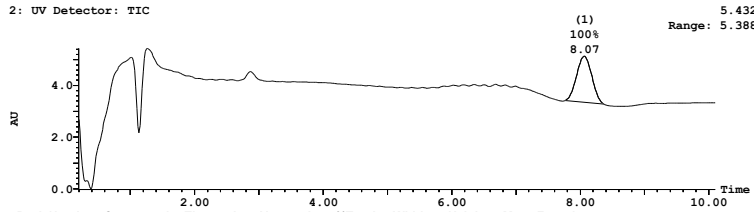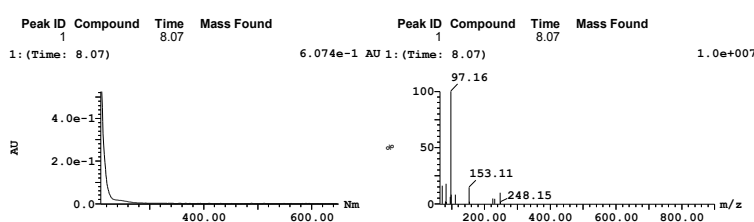

Spectral data 6i

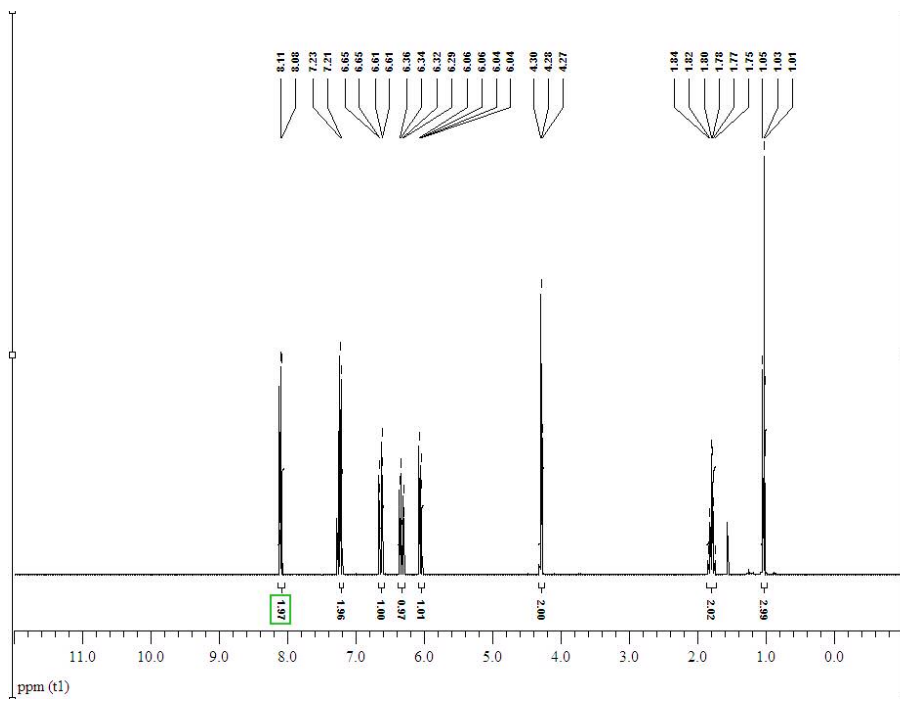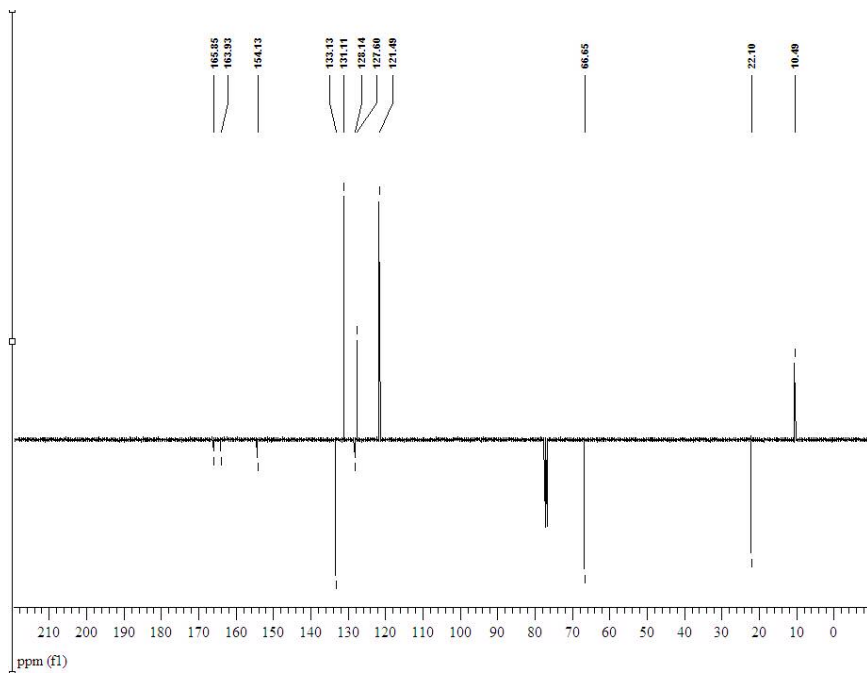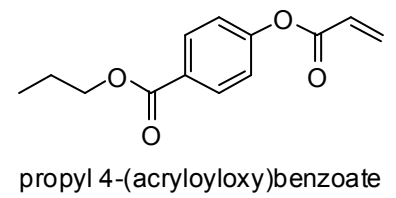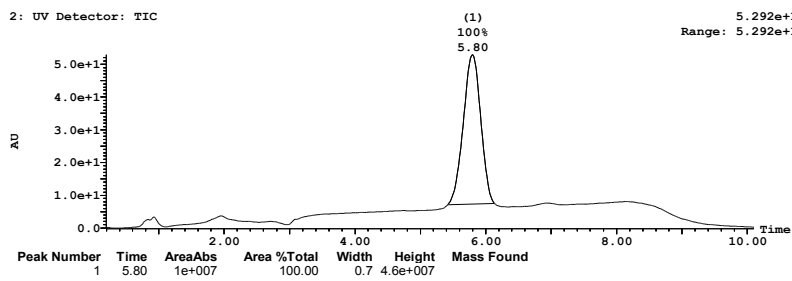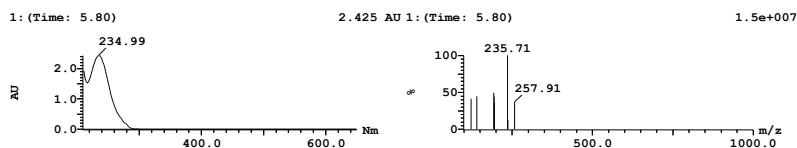

Spectral data 6j



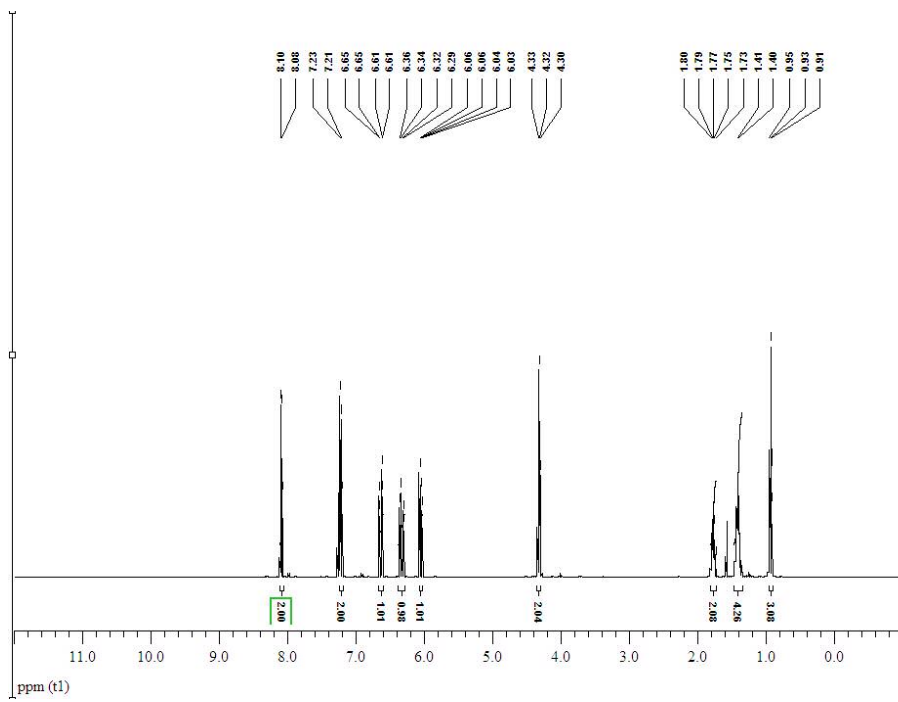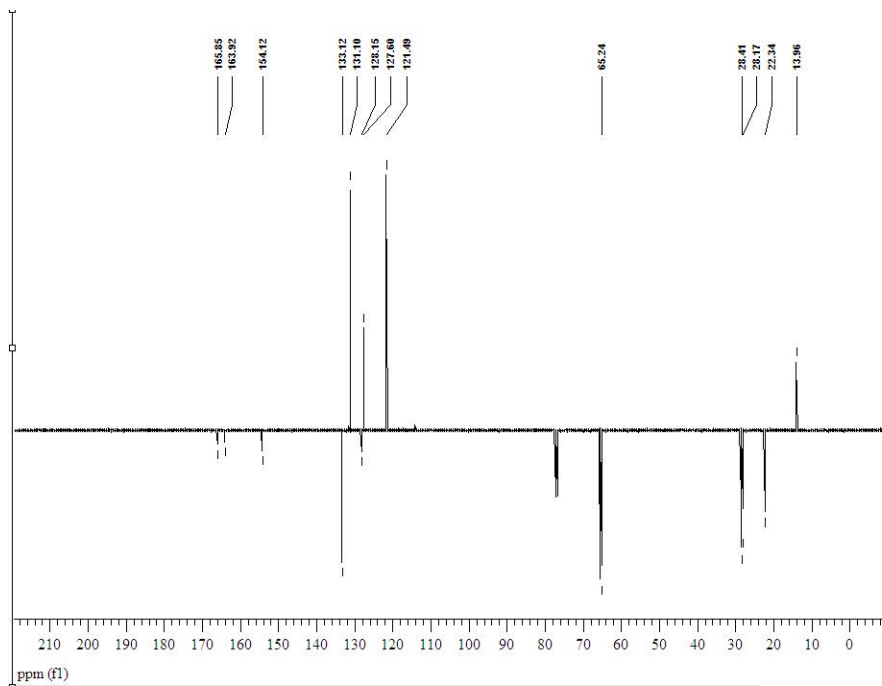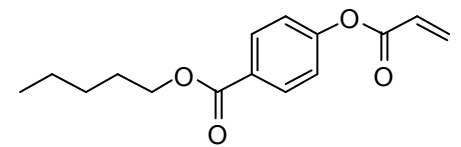

pentyl 4-(acryloyloxy)benzoate

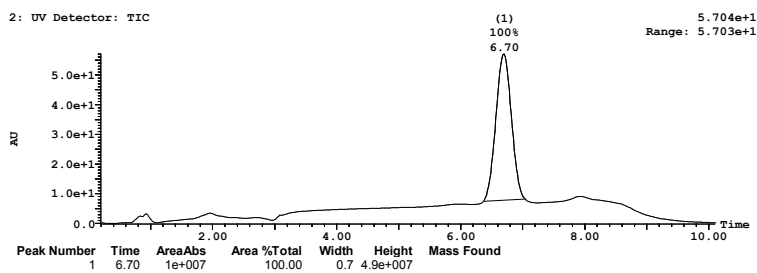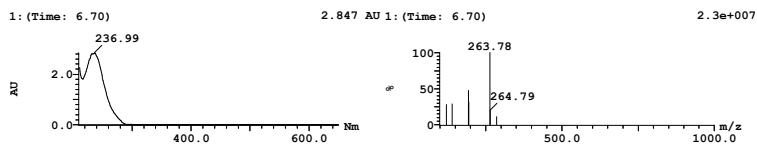

Spectral data 6k

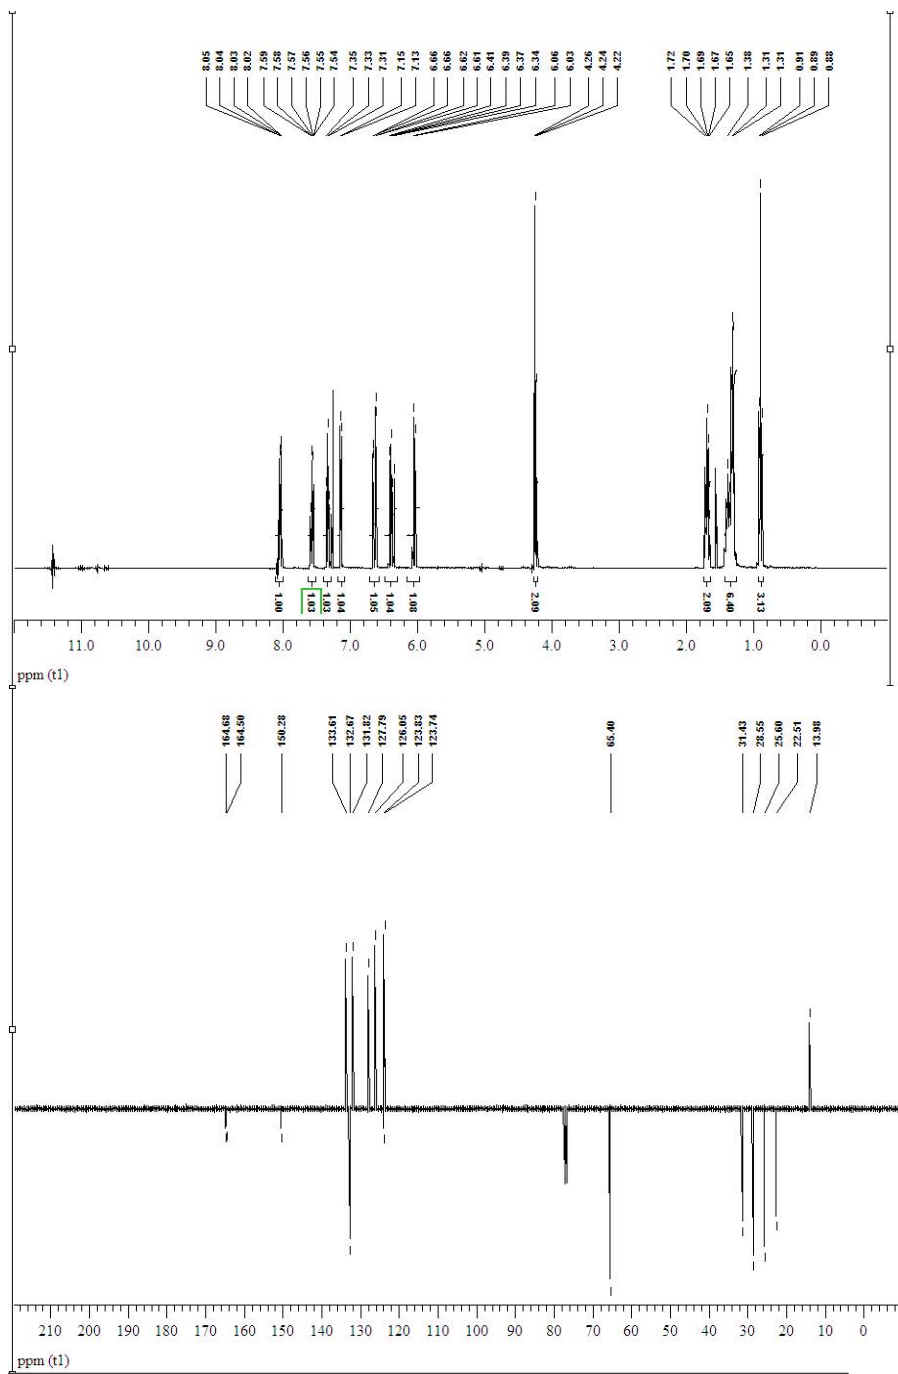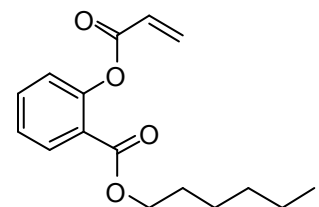

hexyl 2-(acryloyloxy)benzoate

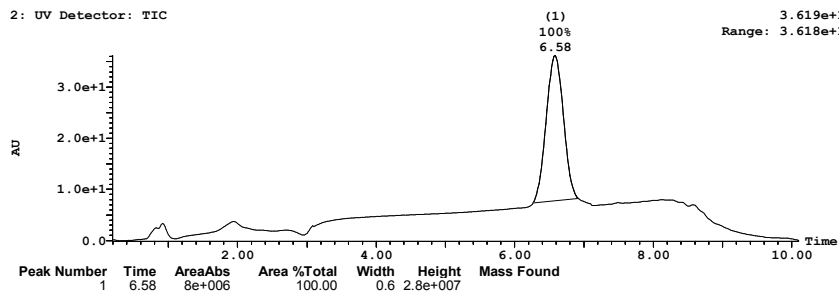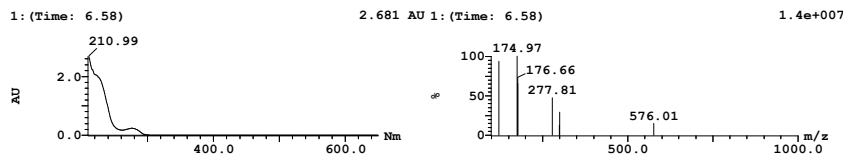

Spectral data 6I

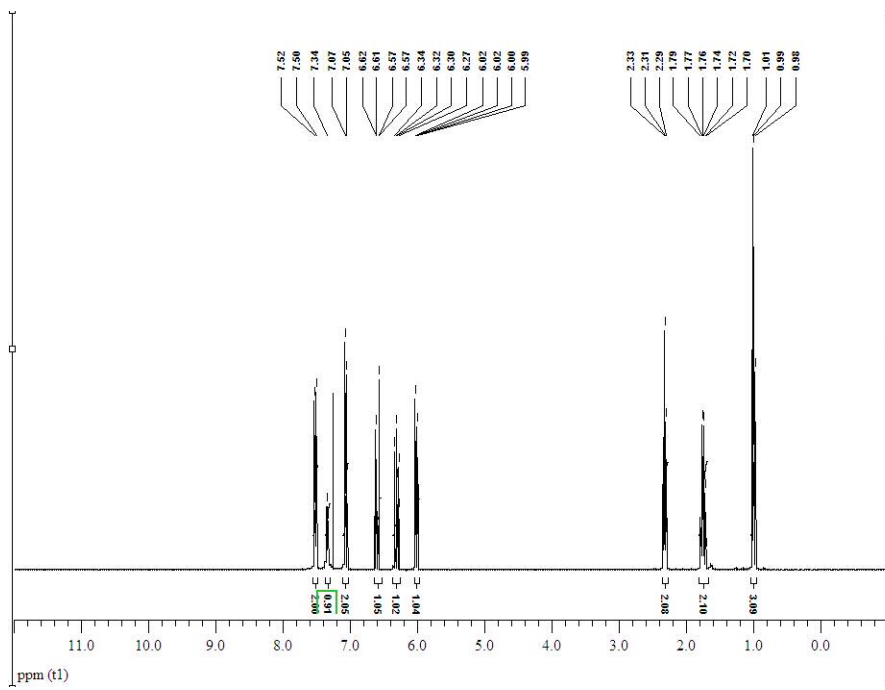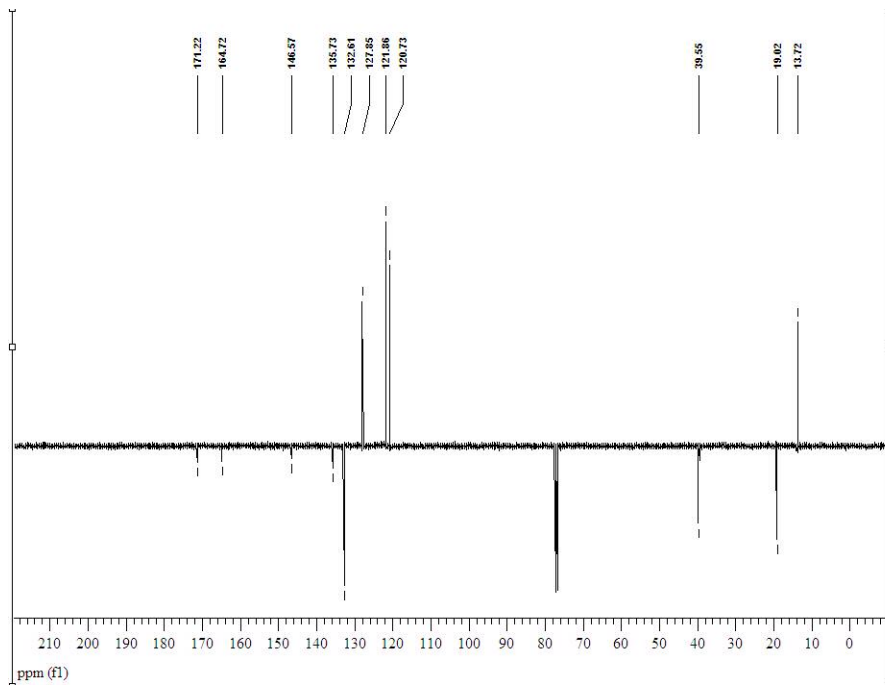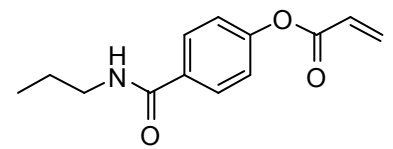

4-(propylcarbamoyl)phenyl acrylate

Sample: 34 Date: 12-May-2006 Vial: 2.2.D Time: 23:58:18 File: LAAG219\_10\_2 Page 1

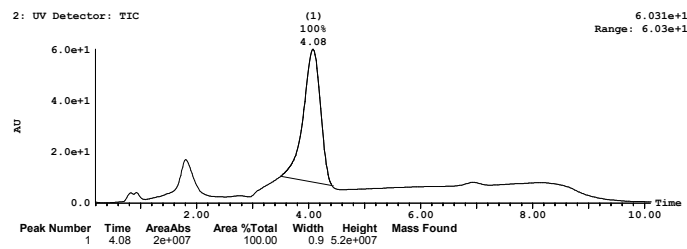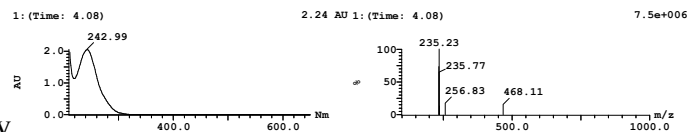

Spectral data 6m

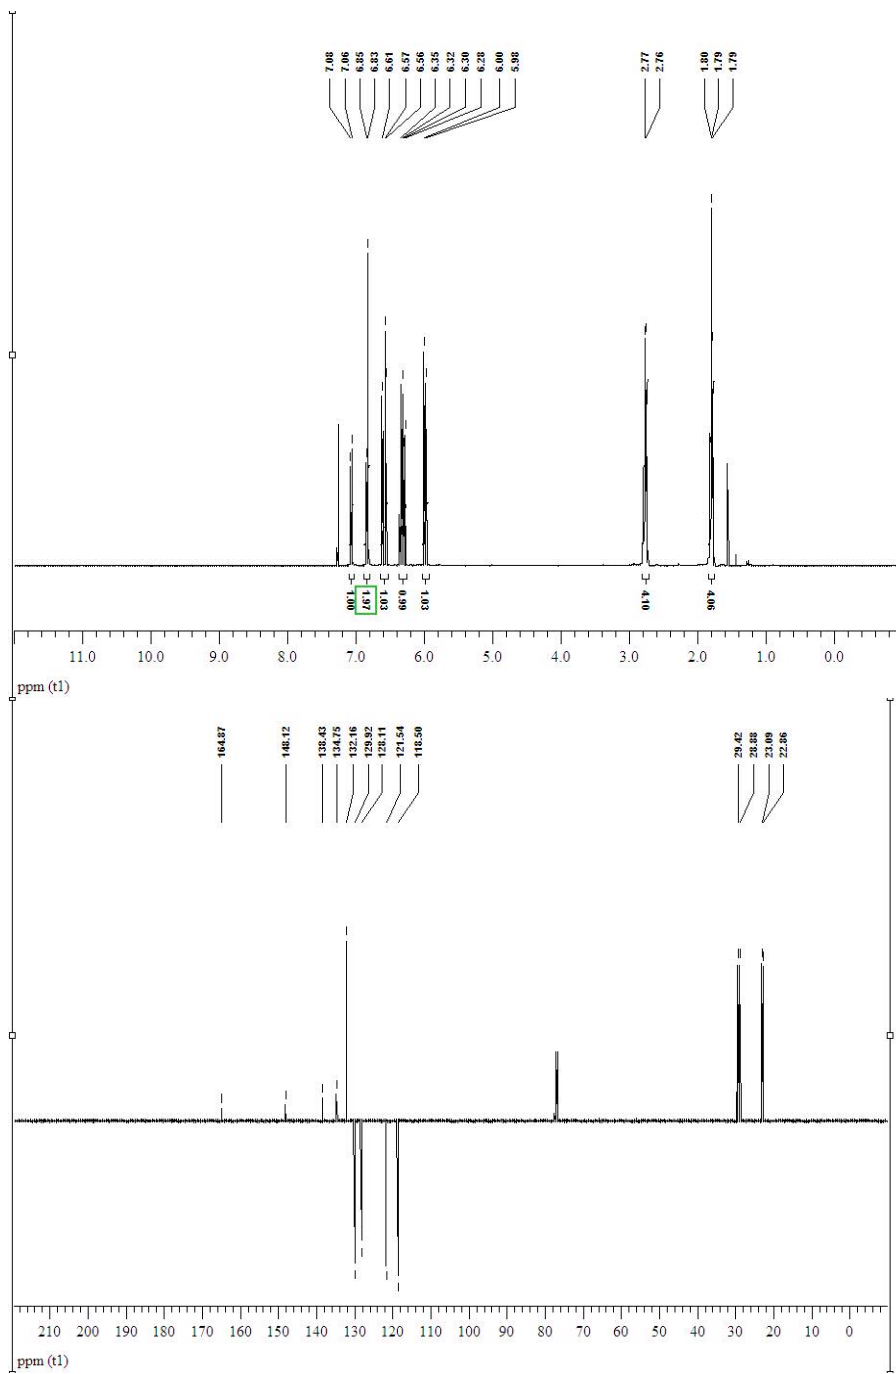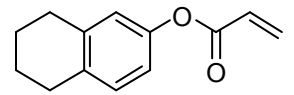

5,6,7,8-tetrahydronaphthalen-2-yl acrylate

Sample: 26 Vial: 2.5.C File: LAAG219\_13\_2 Page 1  
 Date: 12-May-2006 Time: 22:32:33

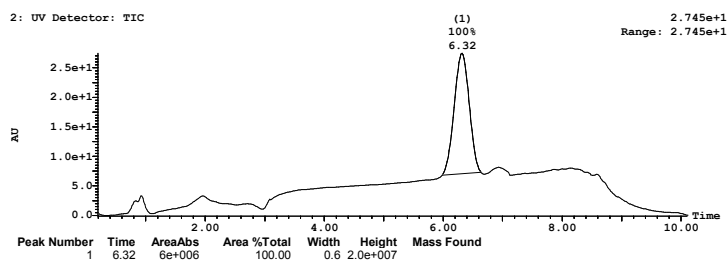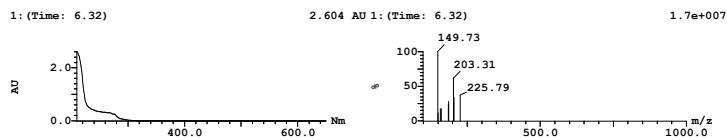

Spectral data 7a

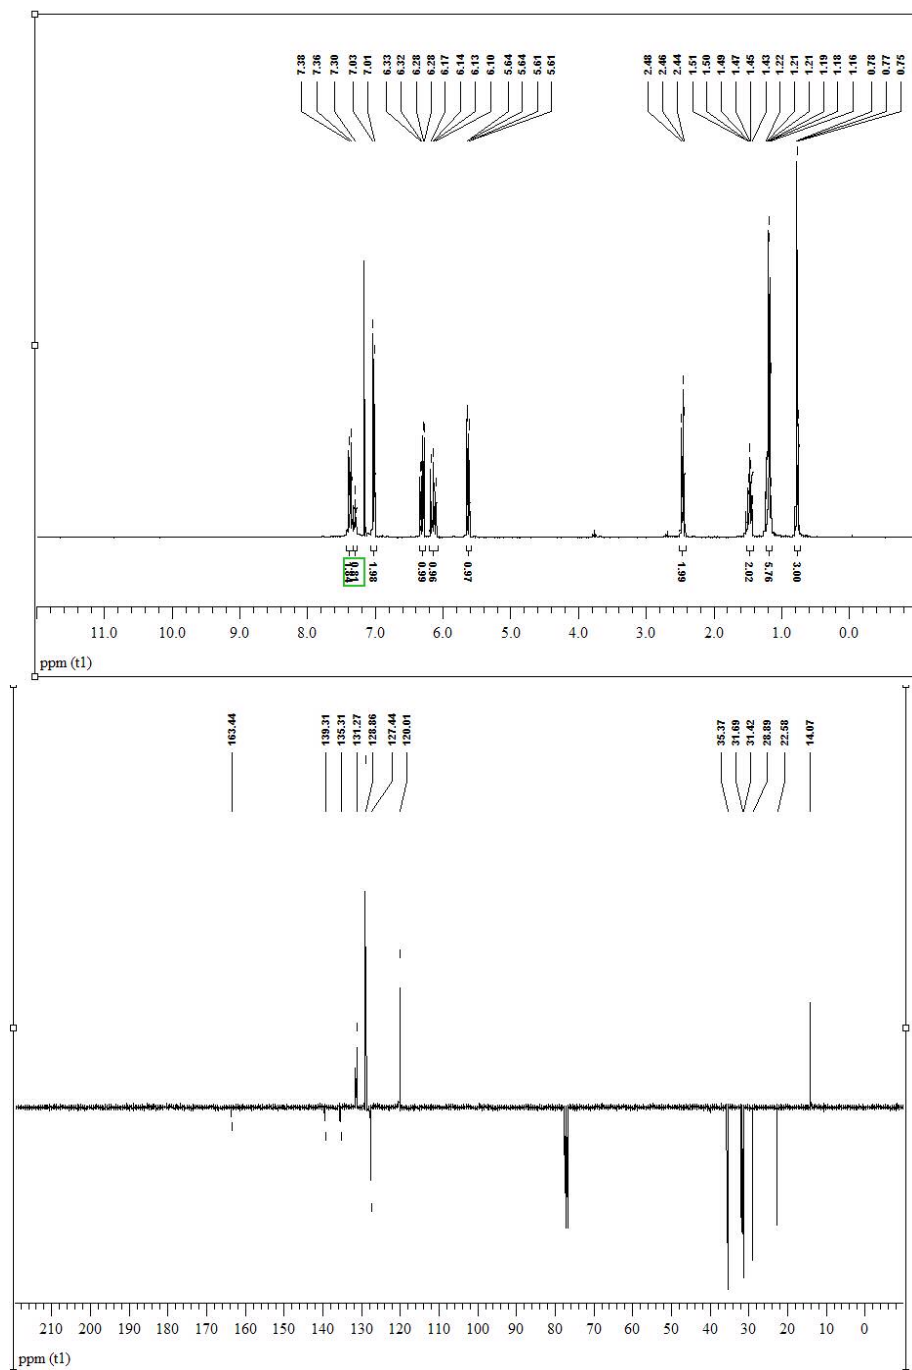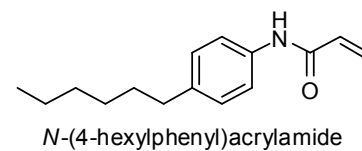

Sample: 1 Vial: 1:1A File: TRA1 Page 1  
 Date: 15-Nov-2005 Time: 15:24:53

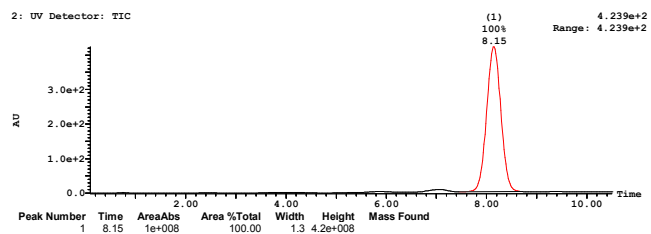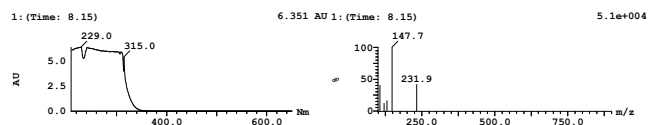

Spectral data 7b

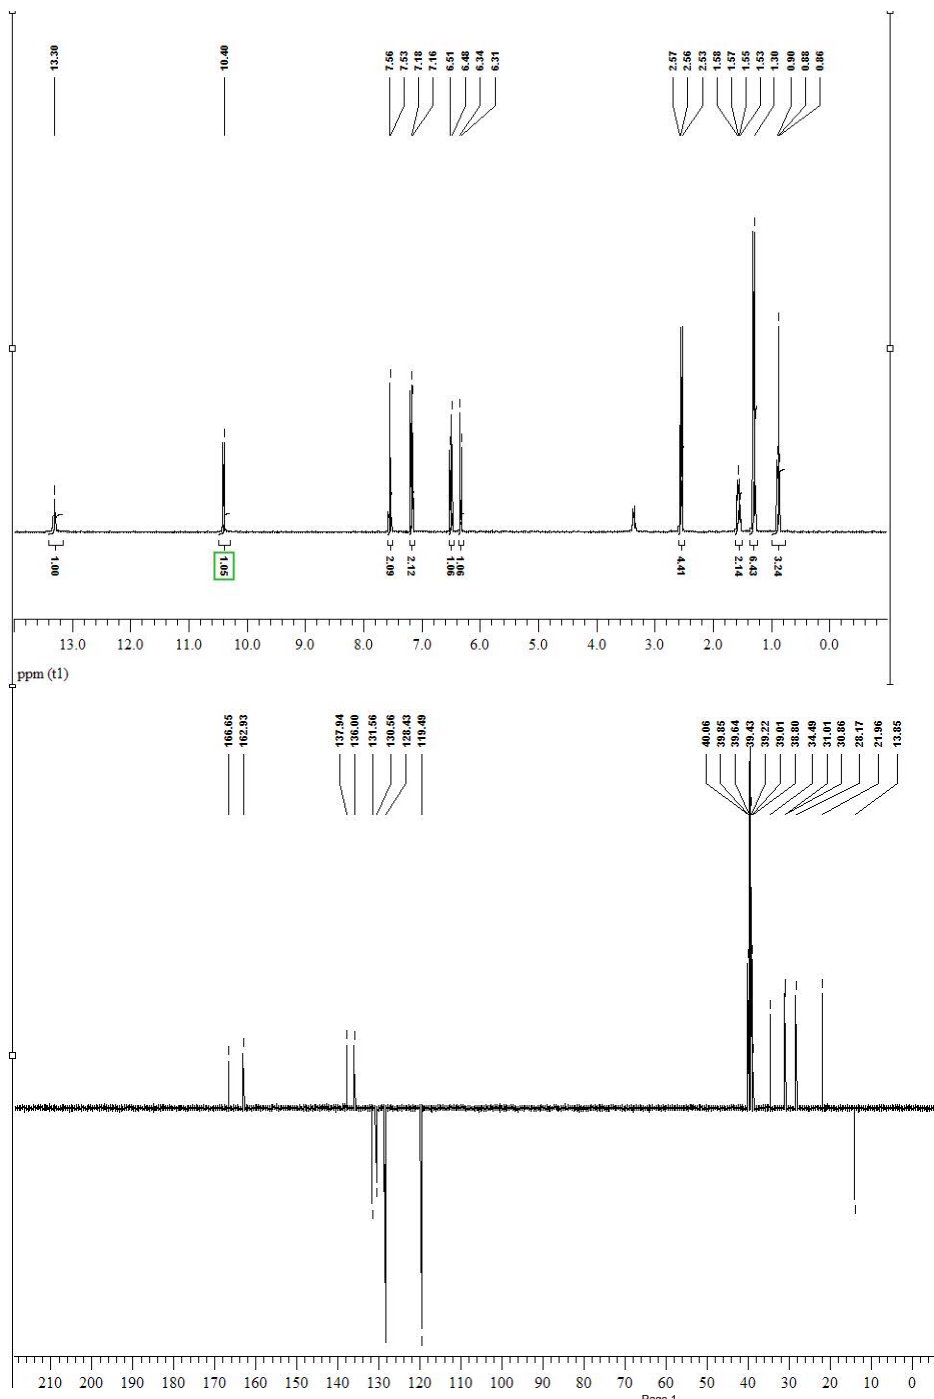

Sample: 2 Vial:3.2.F File:LAAG133 Page 1  
 Date:24-Apr-2006 Time:17:00:18

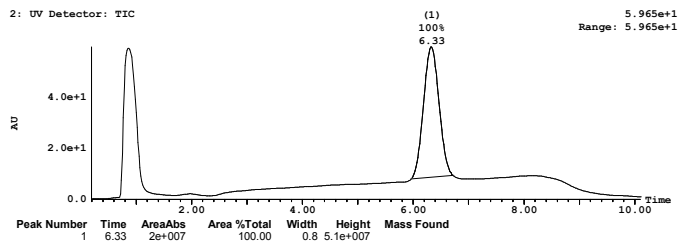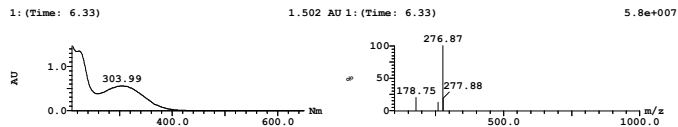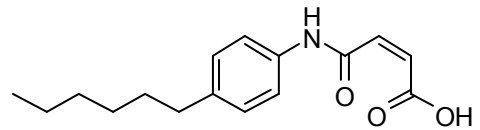

(Z)-4-(4-hexylphenylamino)-4-oxobut-2-enoic acid

Spectral data 7c

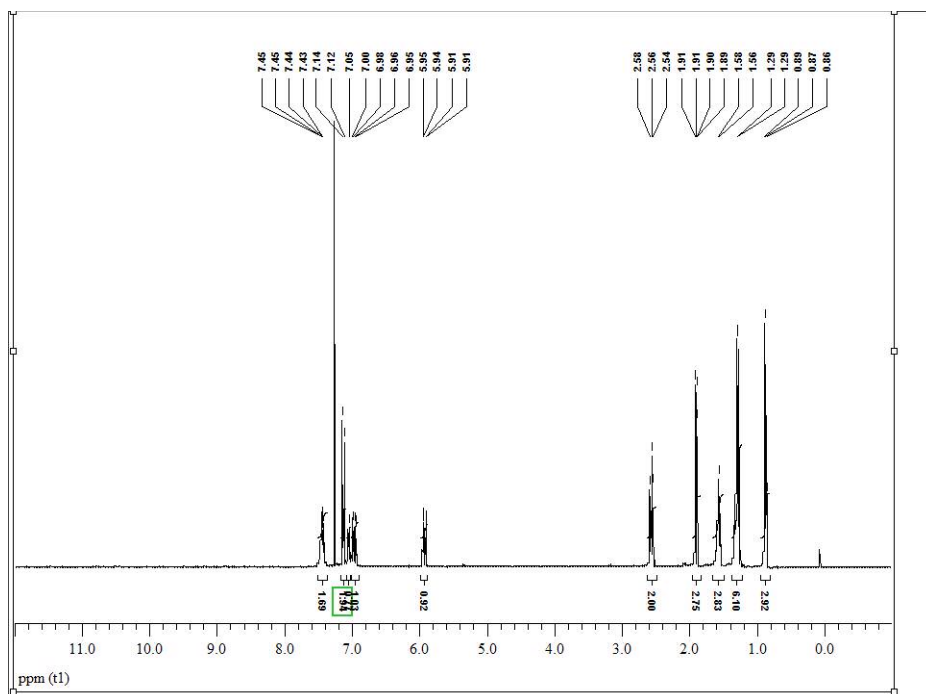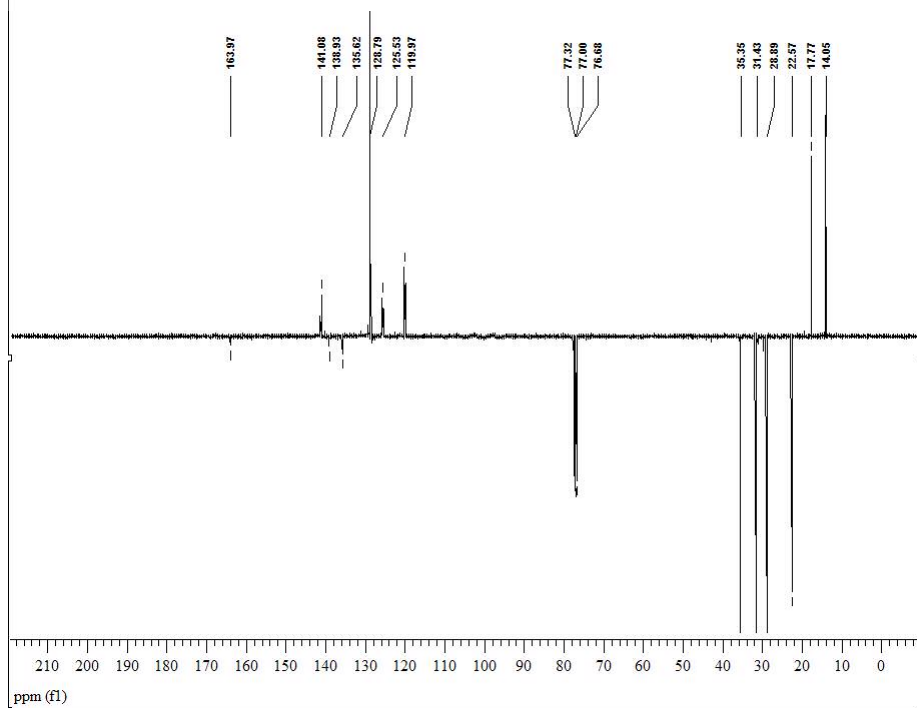

Sample: 3 Vial: 32.A File: LAAG177 Page: 1  
 Date: 21-Apr-2006 Time: 14:25:43

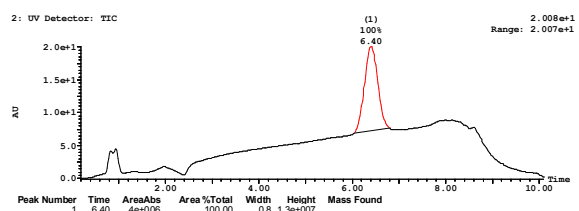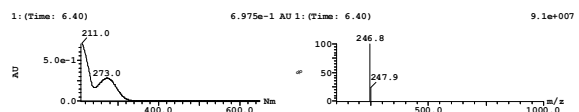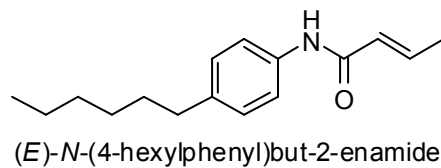

Spectral data 7d

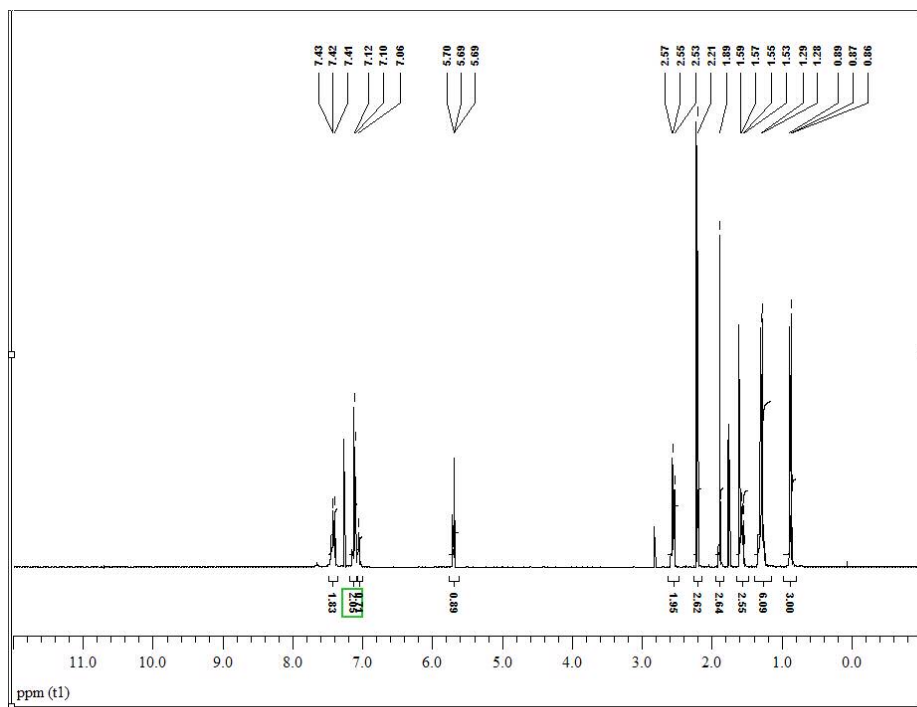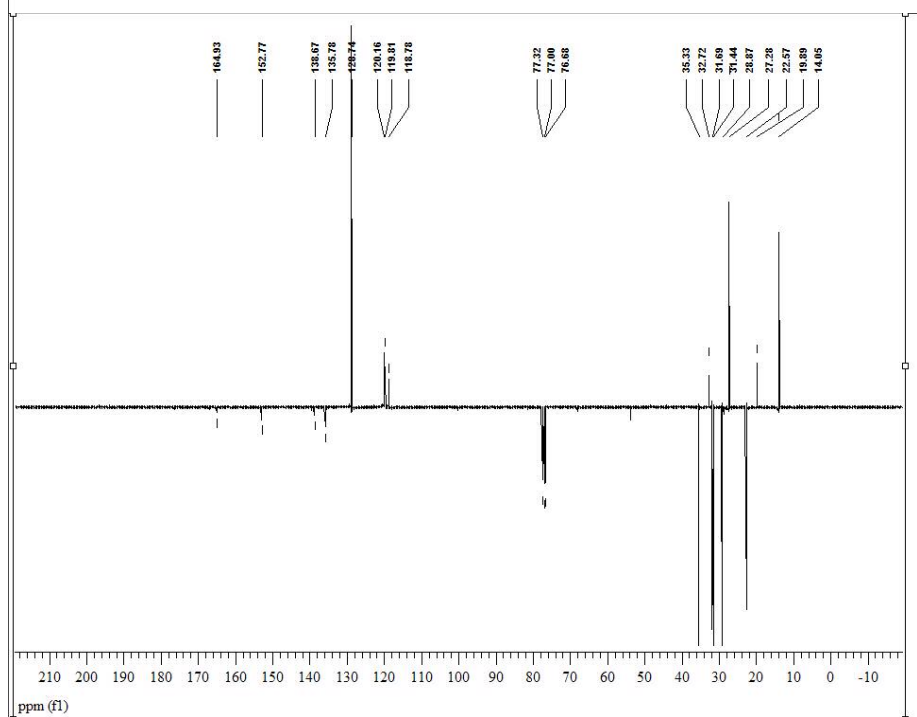

Sample: 4 Vial:2,4\_A File:LAAG177\_1 Page 1  
 Date:21-Apr-2006 Time:12:20:55

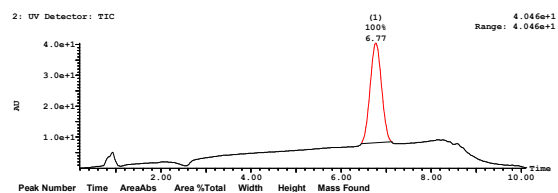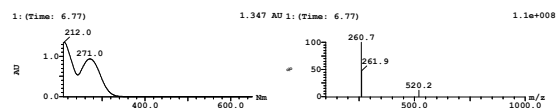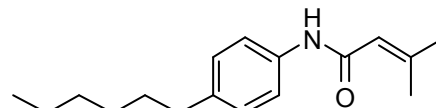

N-(4-hexylphenyl)-3-methylbut-2-enamide

Spectral data 7e



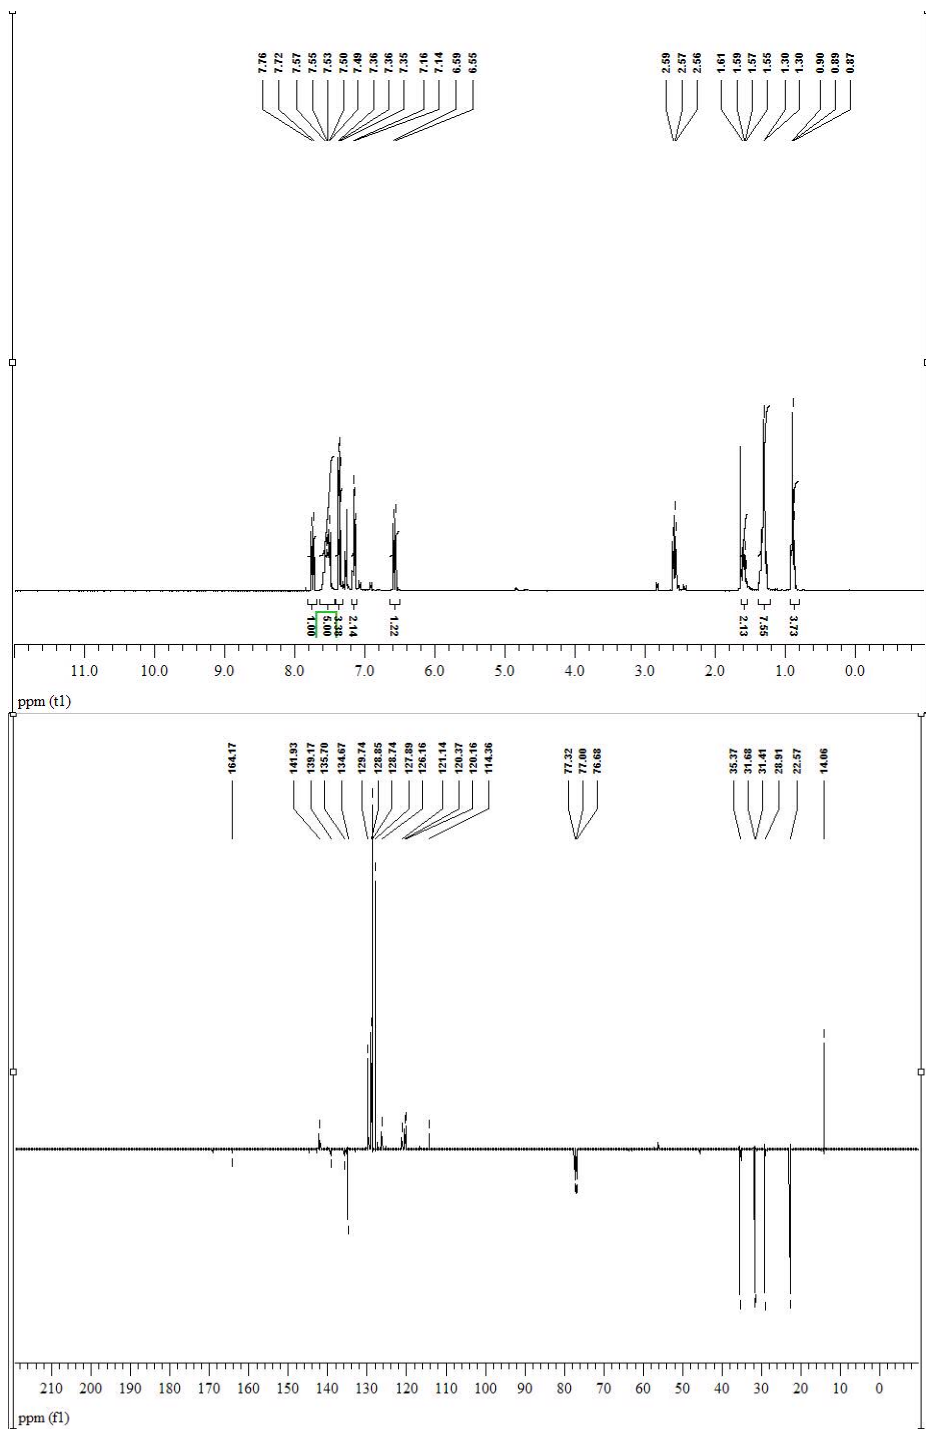

Sample: 6      Vial: 2-7.A      File: LAAG181\_1      Page 1  
 Date: 21-Apr-2006      Time: 13:19:12

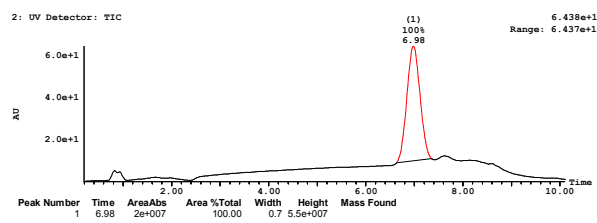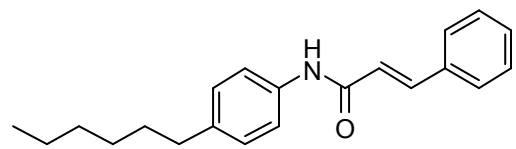

N-(4-hexylphenyl)cinnamide

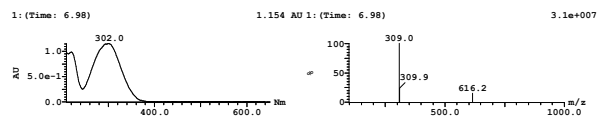

Spectral data 7f

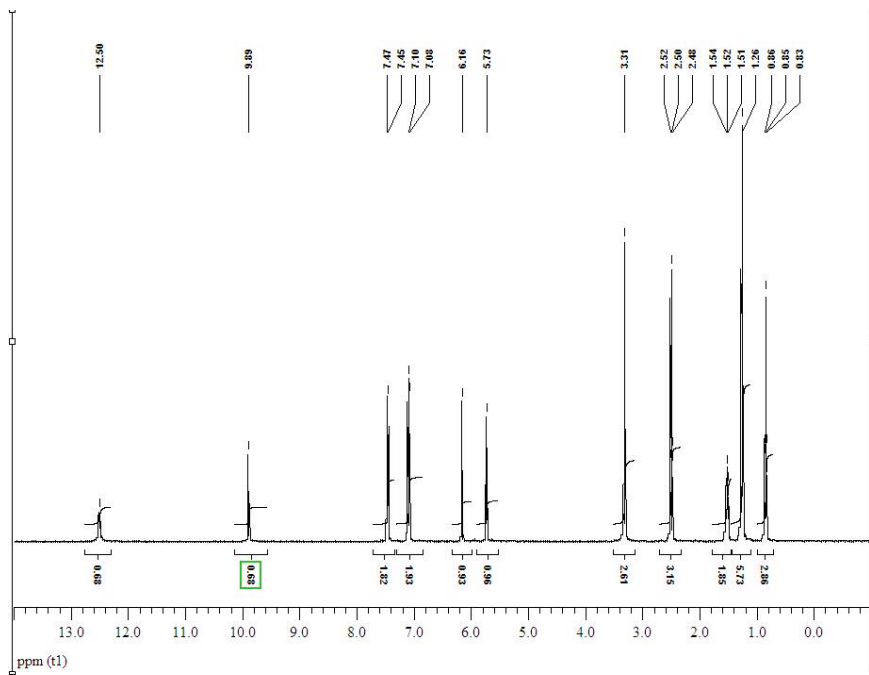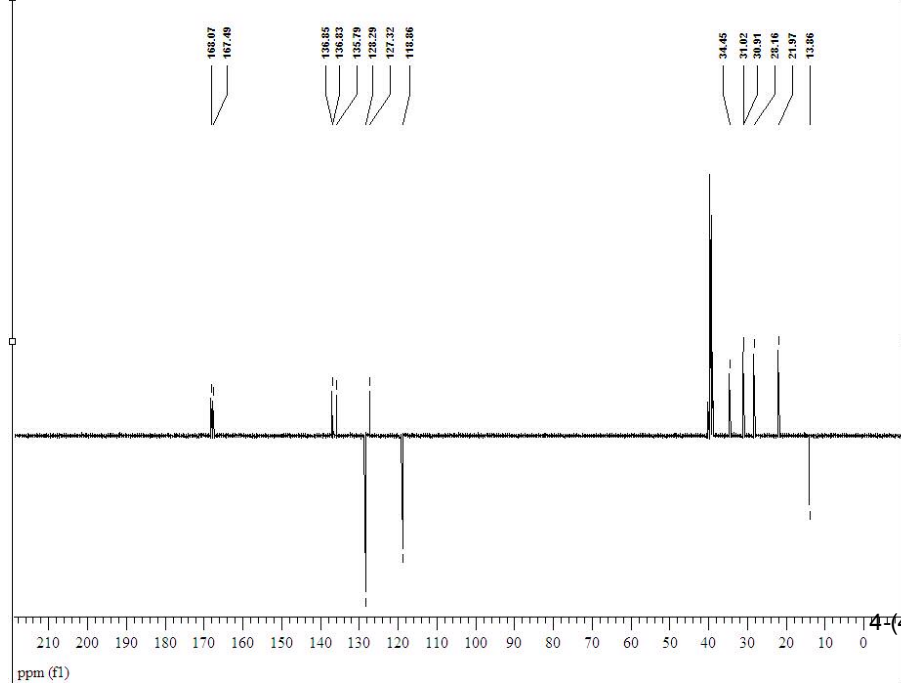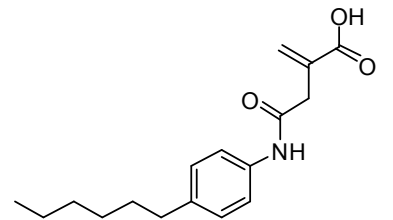

4-(4-hexylphenylamino)-2-methylene-4-oxobutanoic acid

Sample: 9 Vial: 3:9,C File: LAAH163\_1 Page 1  
 Date: 26-Sep-2006 Time: 15:11:16

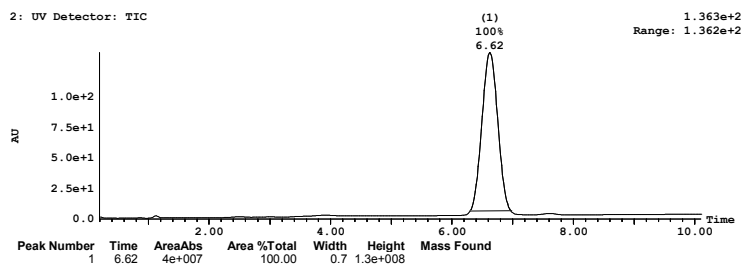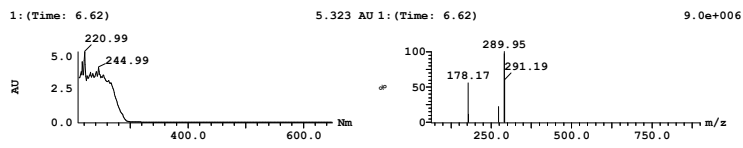

Spectral data 7g

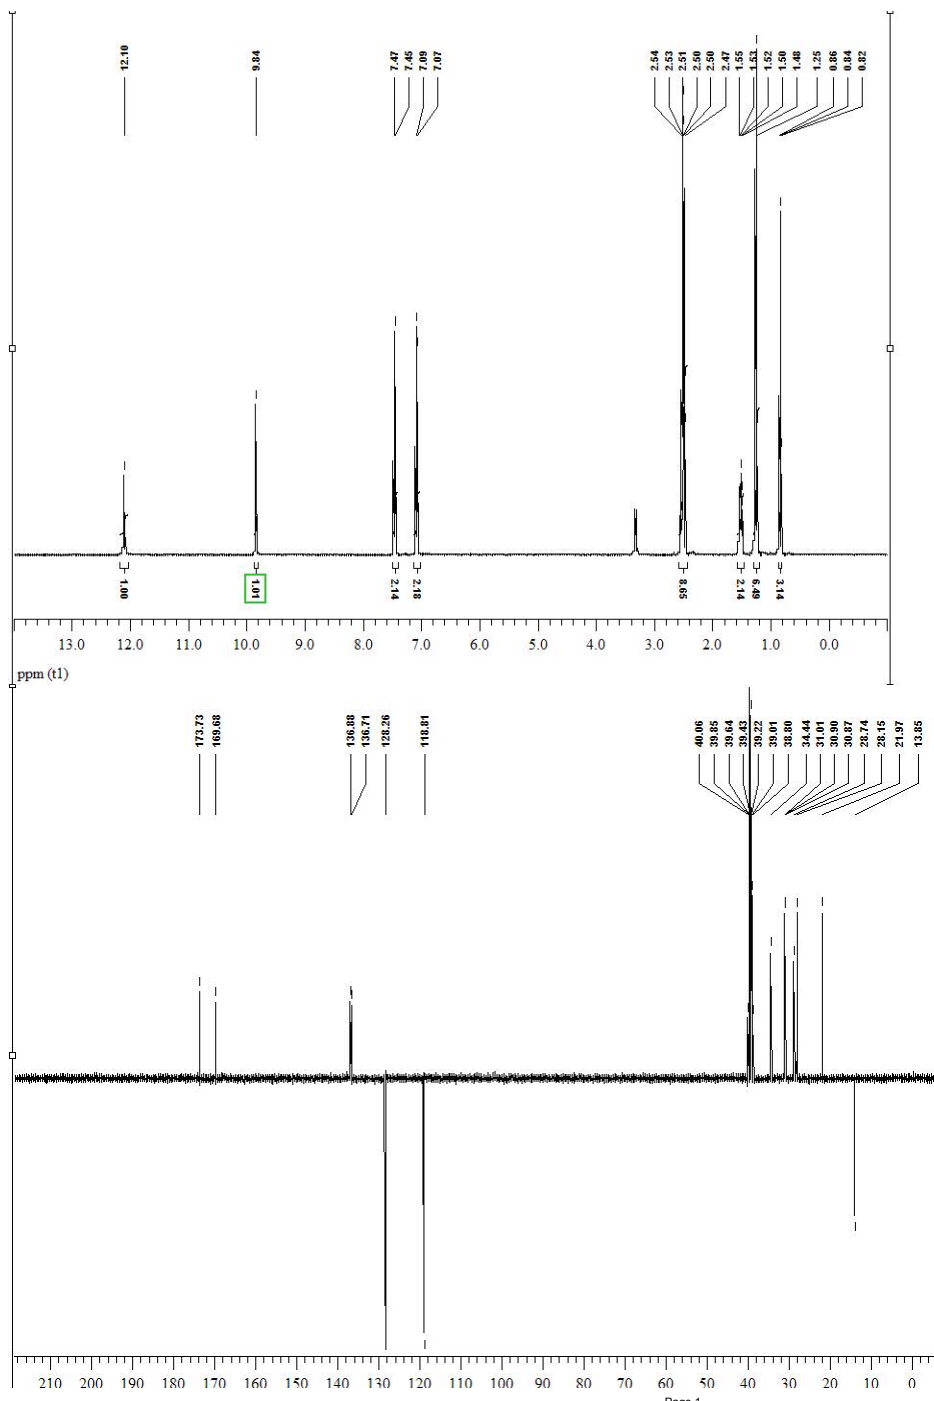

Sample: 3 Vial:3:3.F File:LAAG135 Page 1  
 Date:24-Apr-2006 Time:17:11:00

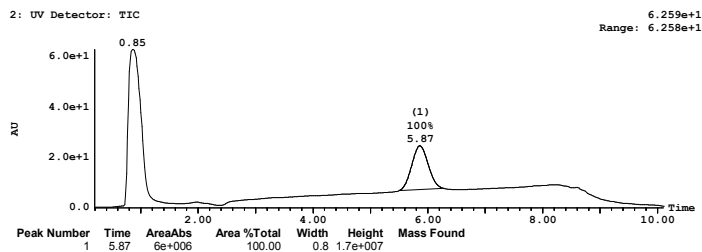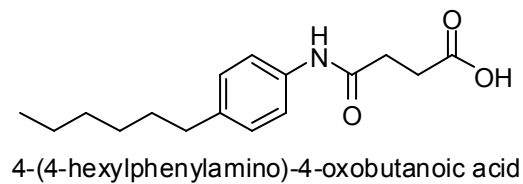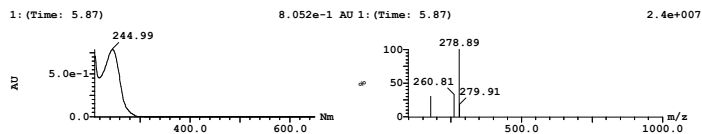

### Spectral data 8a

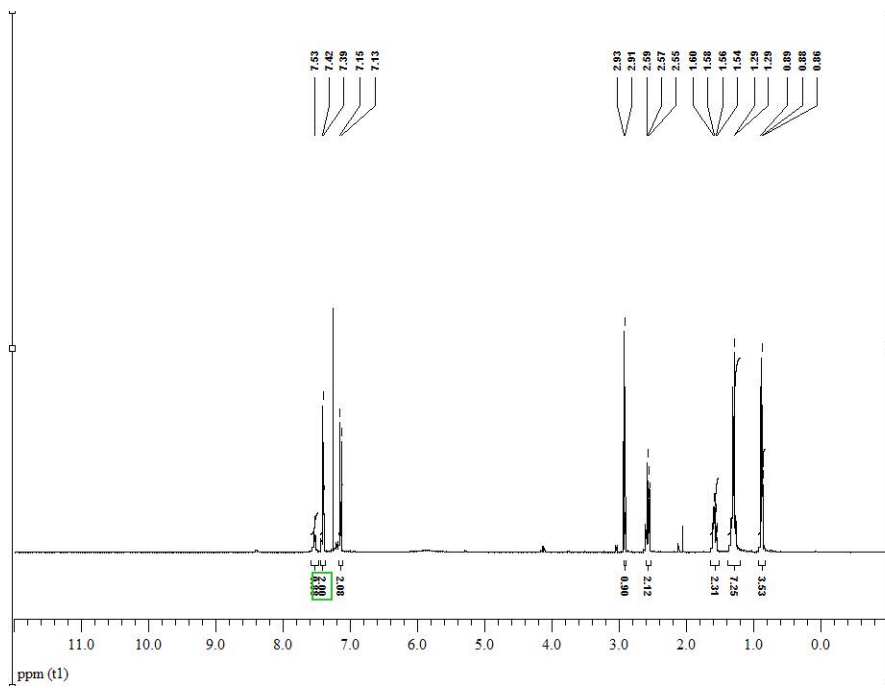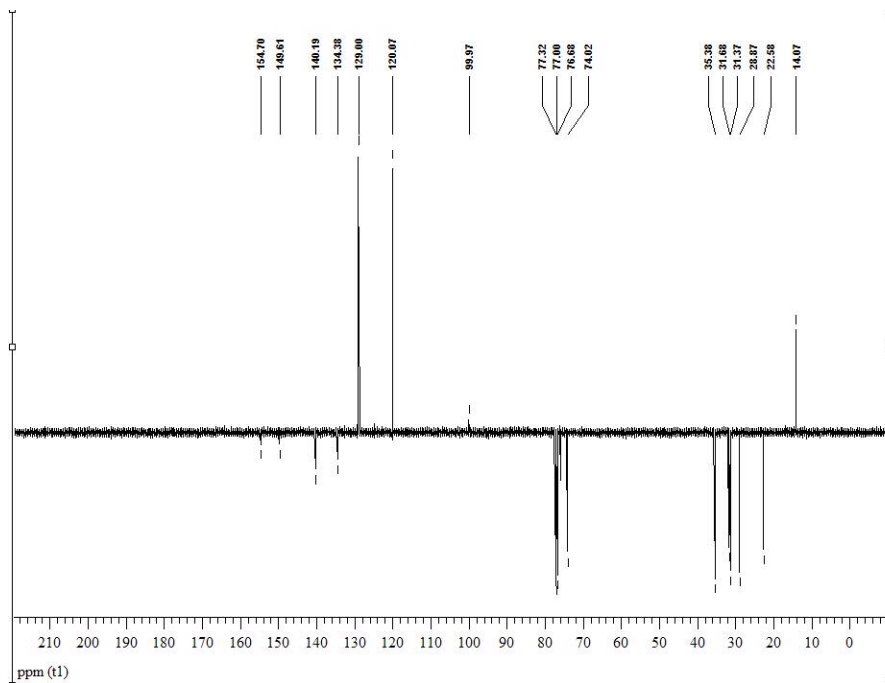

Sample: 1 Vial: 1.7.B File: TRA10 Page 1  
 Date: 15-Nov-2005 Time: 17:06:12

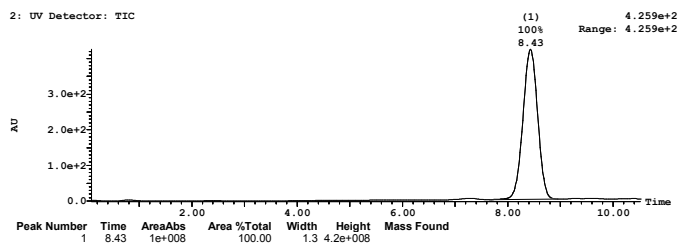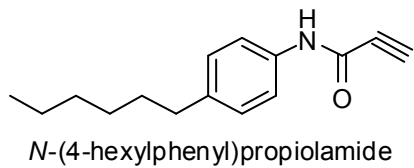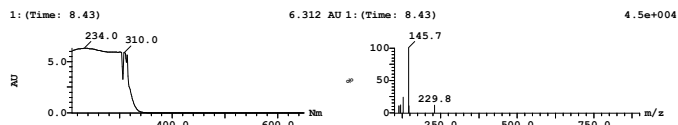

**Spectral data 8b**

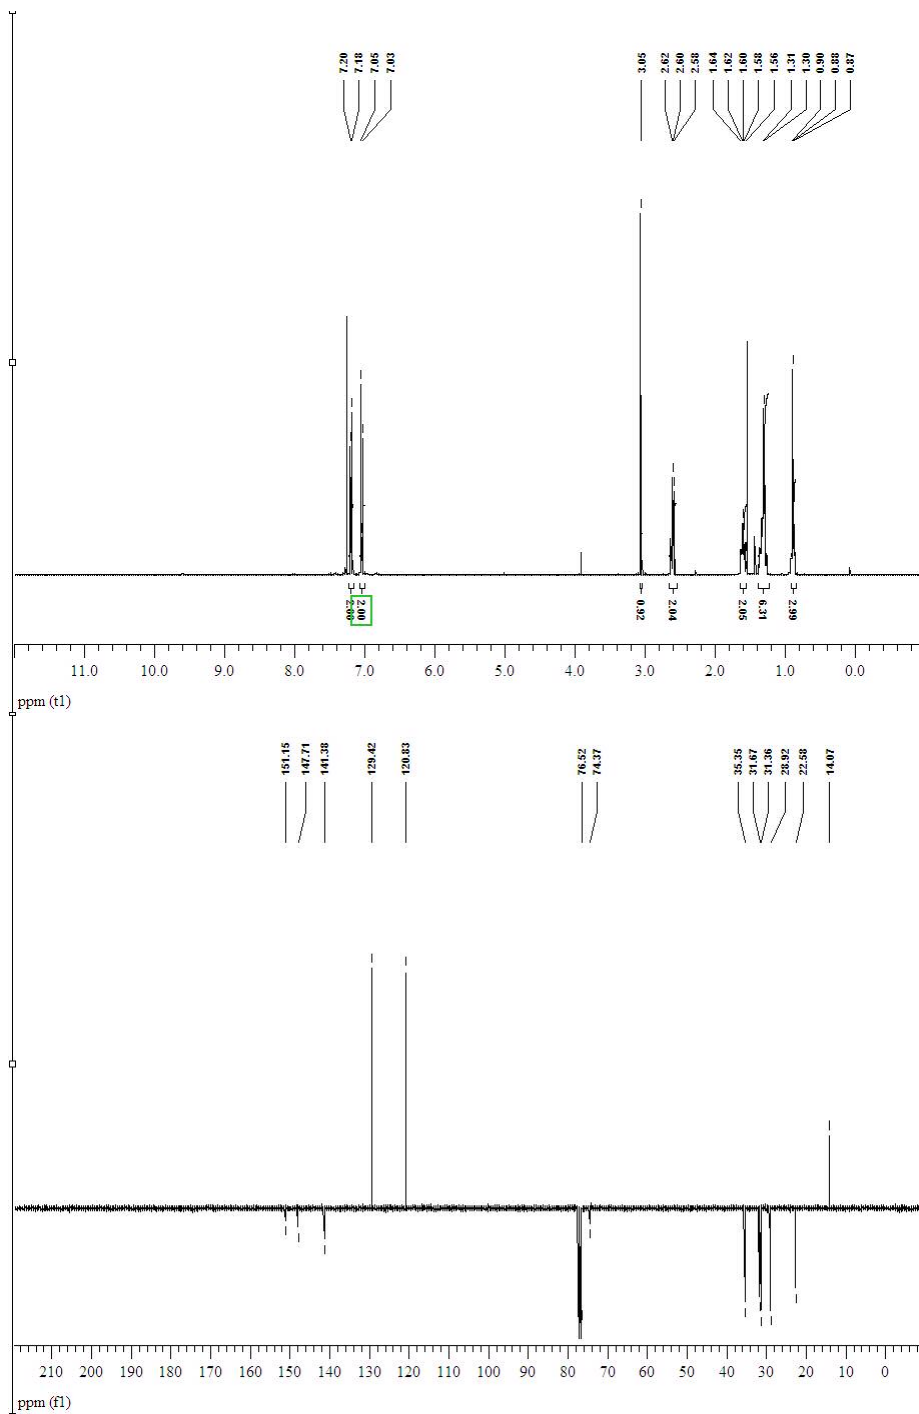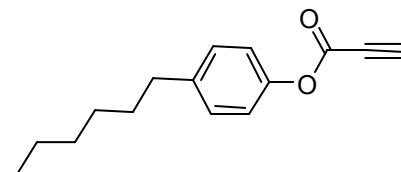

Sample Report:

Sample 2 Vial 1:6,F ID File LAAH215\_3 Date 14-Nov-2006 Time 16:30:26 Description

2: UV Detector: TIC

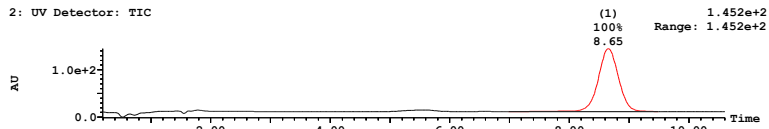

| Peak Number | Compound | Time | AreaAbs | Area %Total | Width | Height | Mass Found |
|-------------|----------|------|---------|-------------|-------|--------|------------|
| 1           |          | 8.65 | 5e+007  | 100.00      | 3     | 1e+008 |            |

| Peak ID | Compound | Time | Mass Found |
|---------|----------|------|------------|
| 1       |          | 8.65 |            |

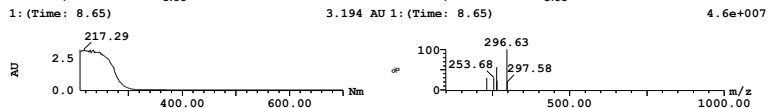

Spectral data 8c

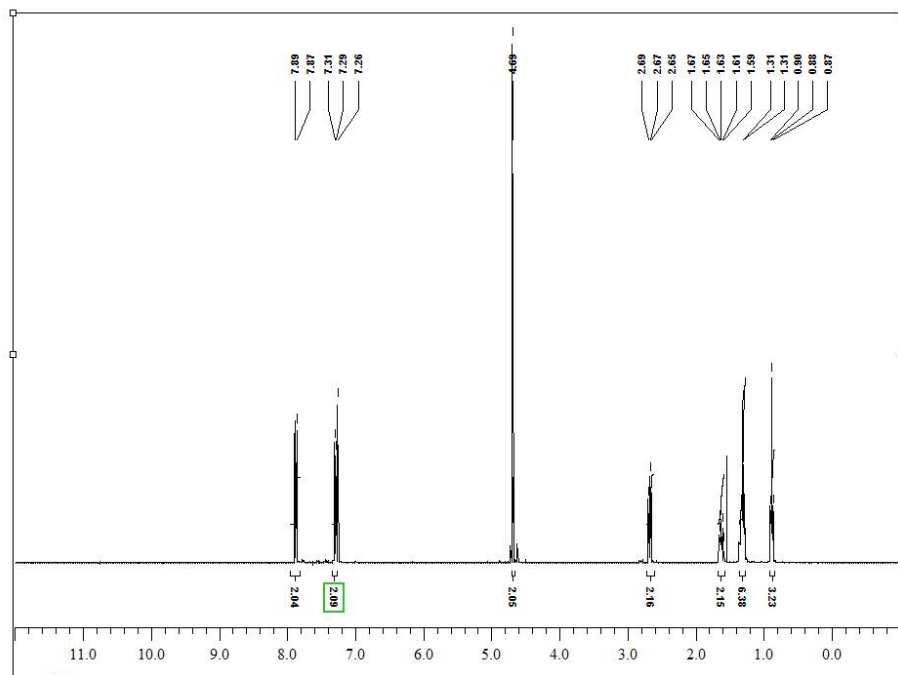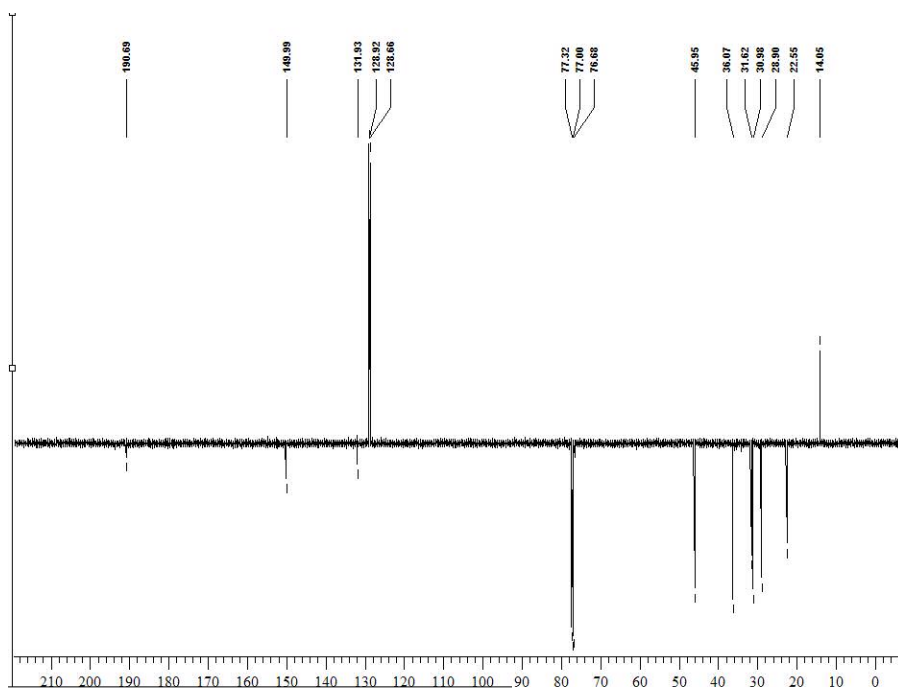

Sample: 1  
Date: 07-Dec-2005  
Vial: 1:8.A  
Time: 13.42:09  
File: TRA9  
Page: 1

3: UV Detector: TIC  
Range: 2.912e+2

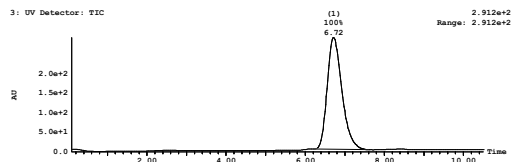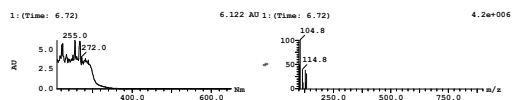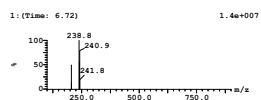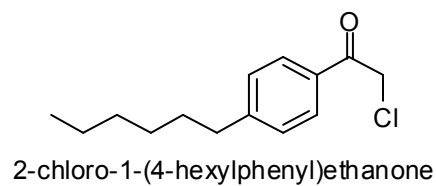

Spectral data 8d

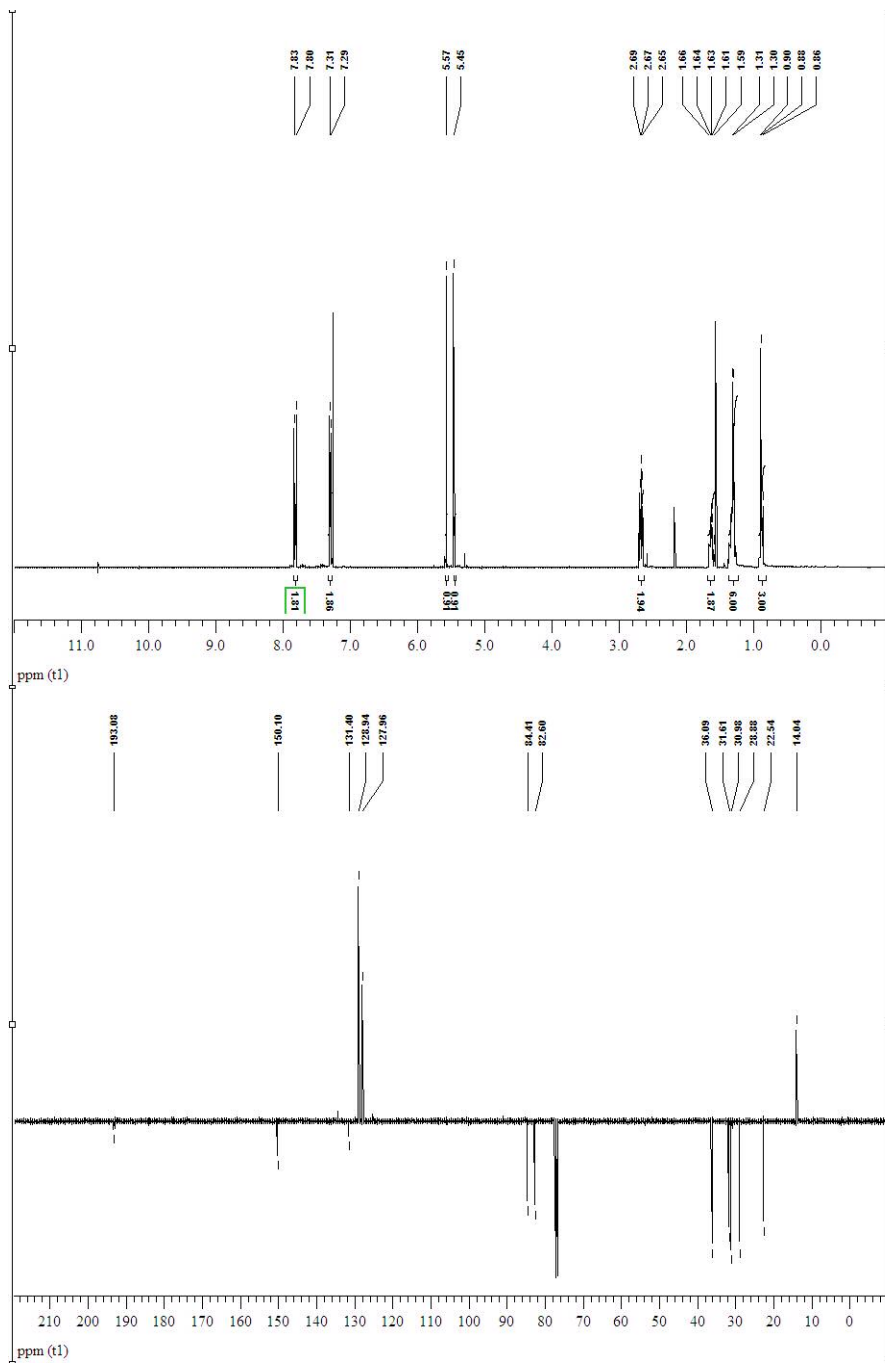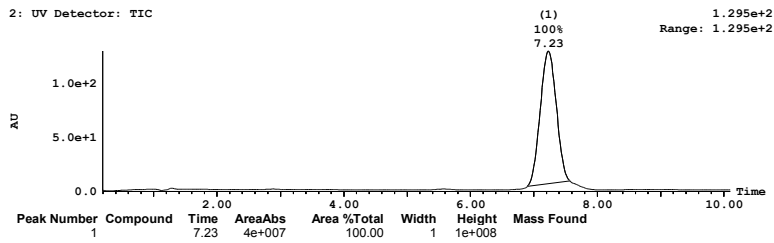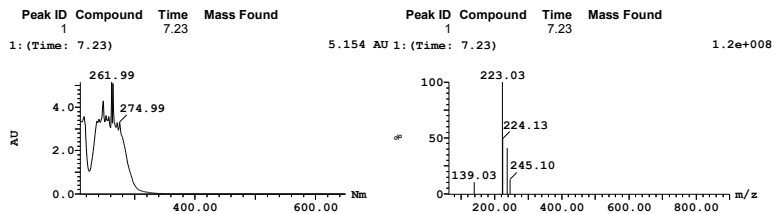

**Spectral data 8e**

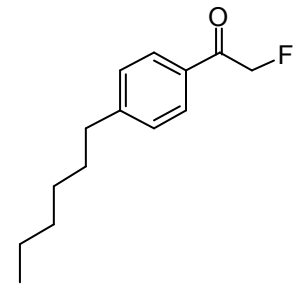

2-fluoro-1-(4-hexylphenyl)ethanone

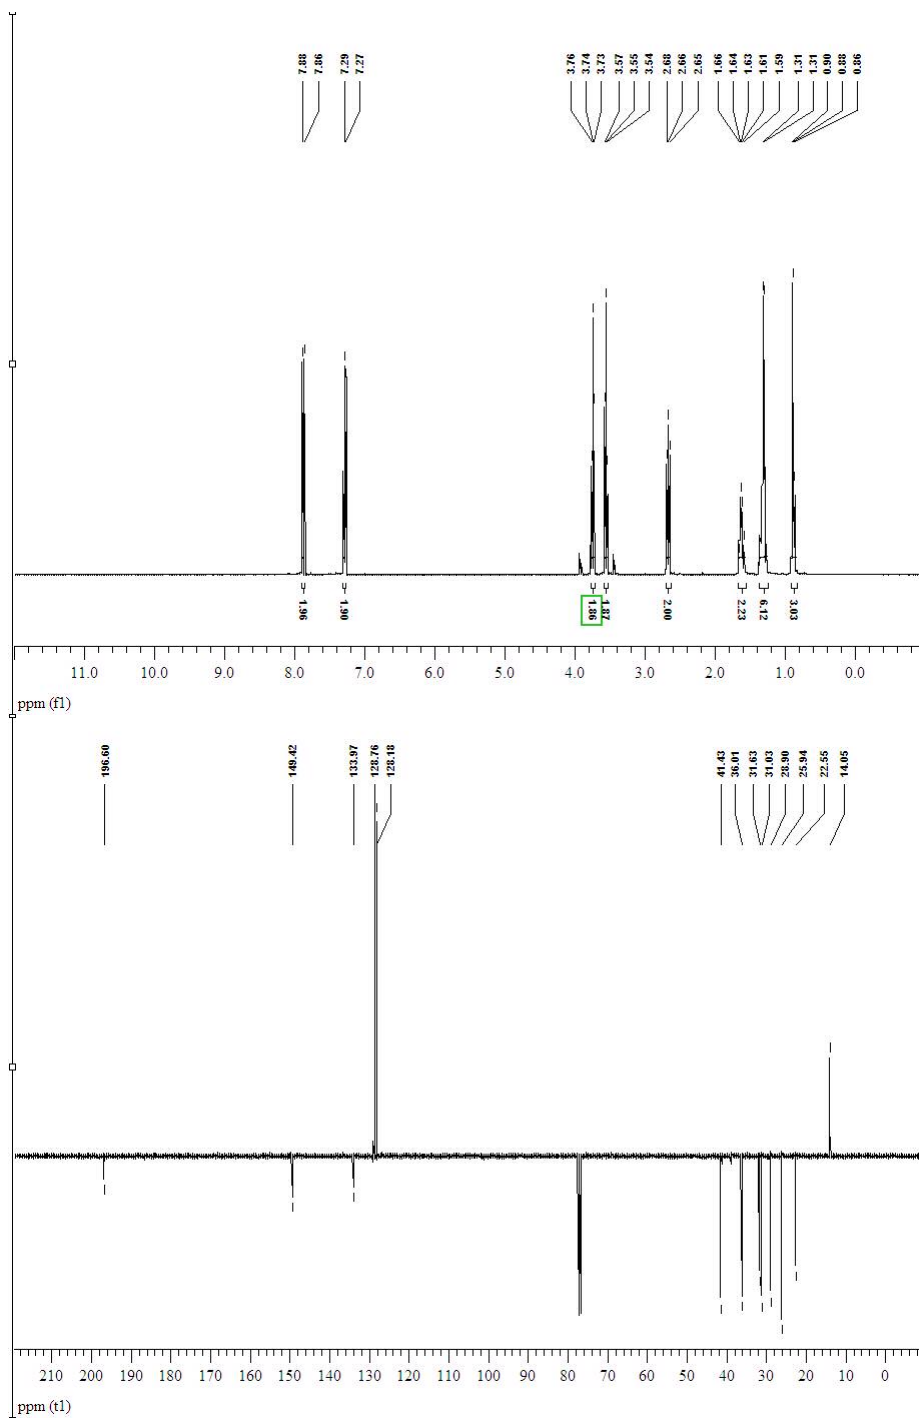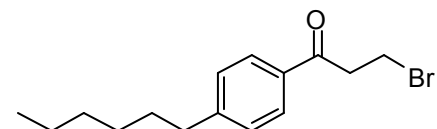

3-bromo-1-(4-hexylphenyl)propan-1-one

Sample Report:

Sample 2 Vial 1:5,F ID File LAAH195 Date 27-Oct-2006 Time 16:41:47 Description

2: UV Detector: TIC

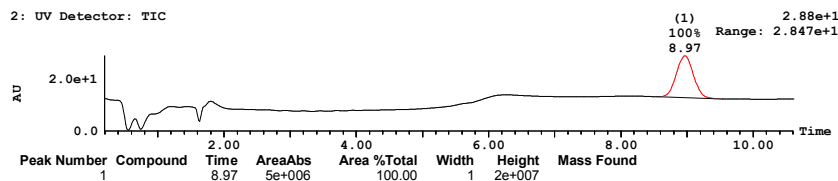

| Peak ID | Compound     | Time | Mass Found | Peak ID | Compound     | Time | Mass Found |
|---------|--------------|------|------------|---------|--------------|------|------------|
| 1:      | (Time: 8.97) |      | 9.942e-1   | AU 1:   | (Time: 8.97) |      | 5.4e+006   |

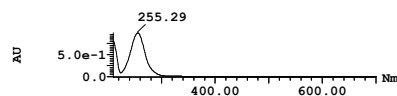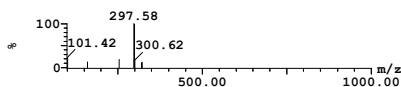

Spectral data 8f



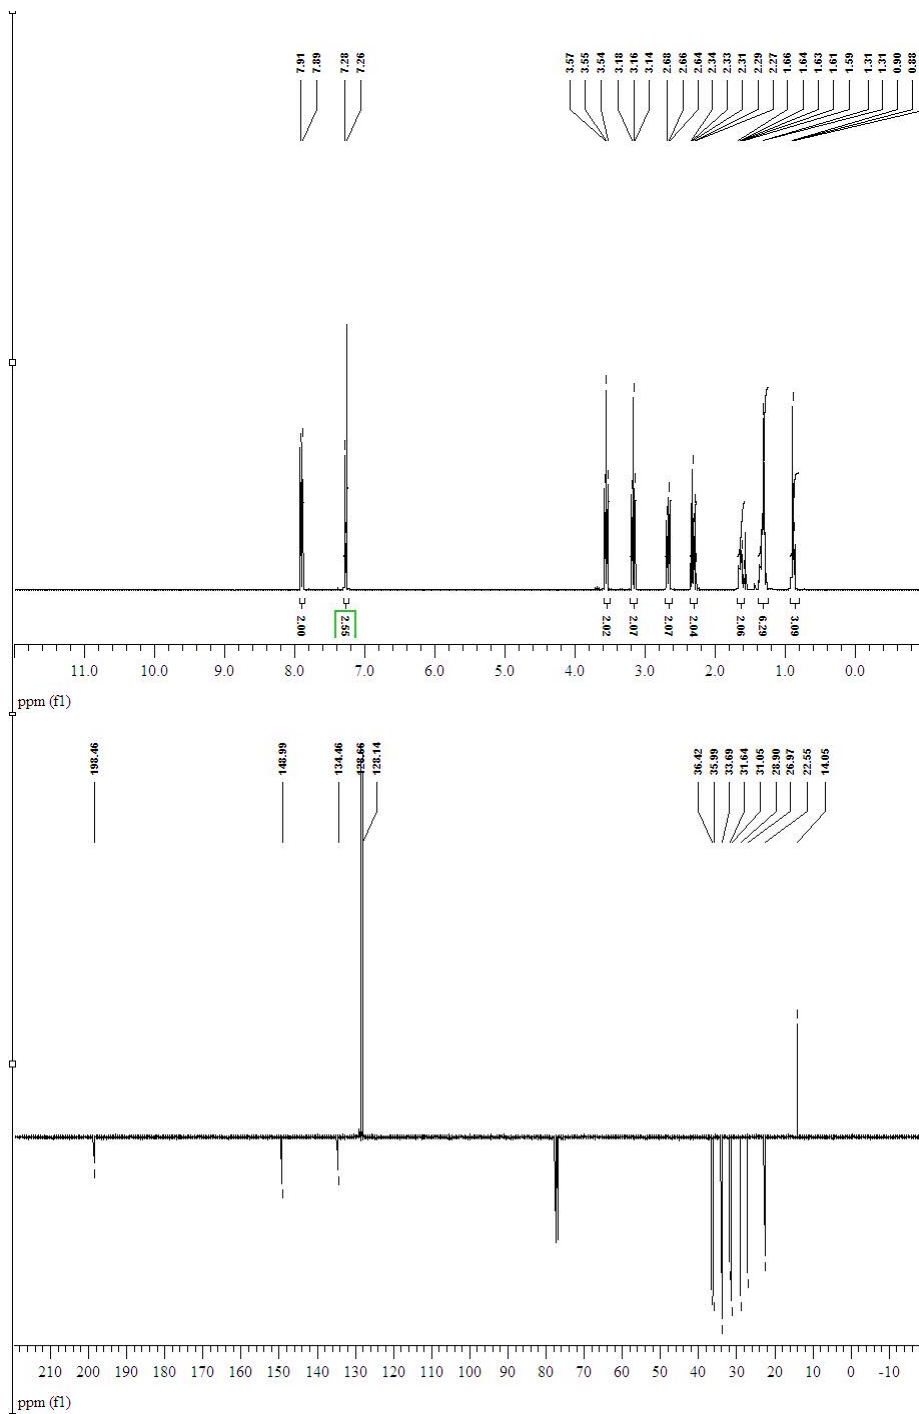

**Sample Report:**

Sample 2 Vial 1:8,F ID File LAAH221 Date 15-Nov-2006 Time 15:53:55 Description

2: UV Detector: TIC

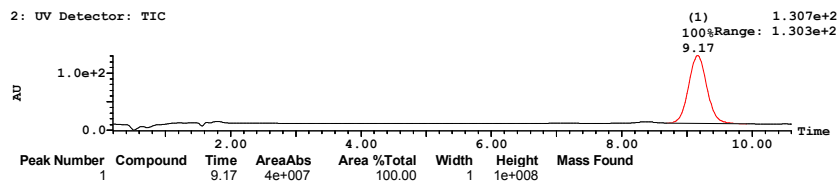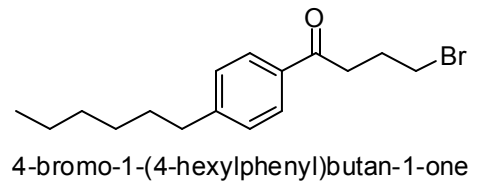

| Peak ID                                  | Compound | Time | Mass Found | Peak ID  | Compound | Time | Mass Found |
|------------------------------------------|----------|------|------------|----------|----------|------|------------|
| 1                                        |          | 9.17 |            | 1        |          | 9.17 |            |
| 1: (Time: 9.17) 3.608 AU 1: (Time: 9.17) |          |      |            | 4.3e+007 |          |      |            |

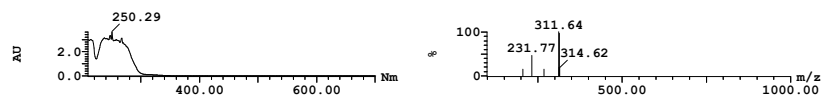

**Spectral data 8g**

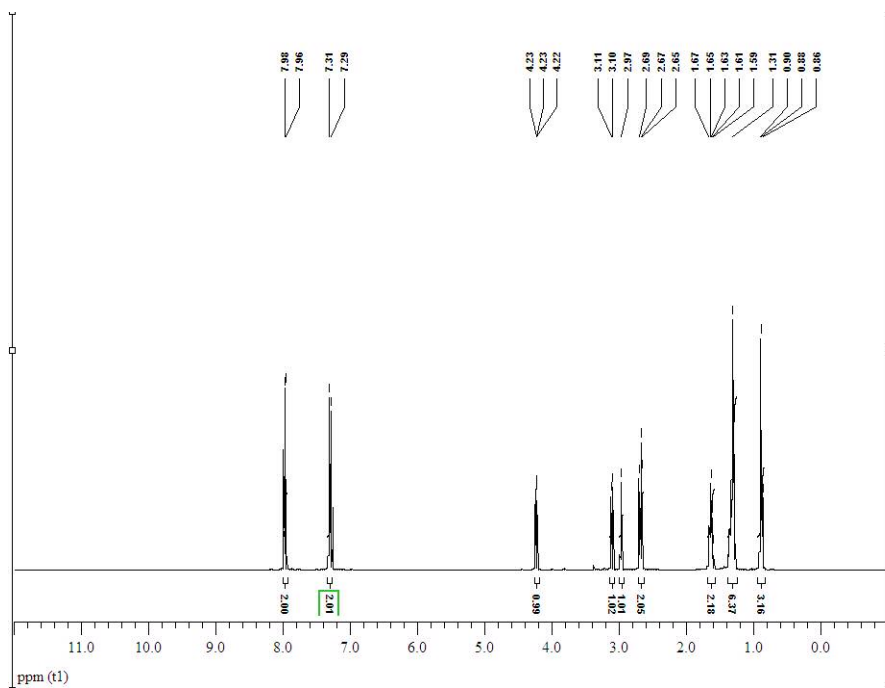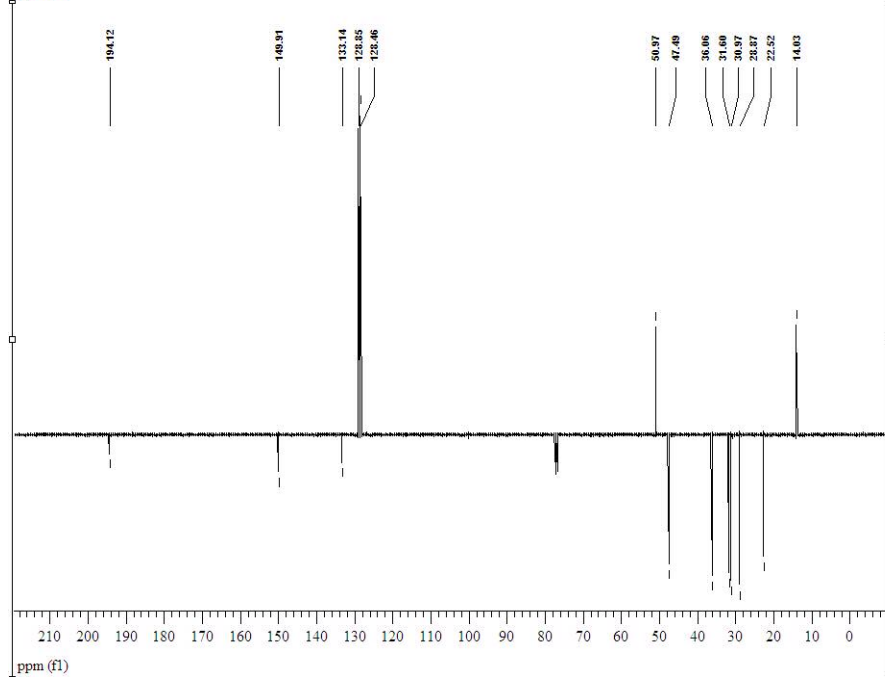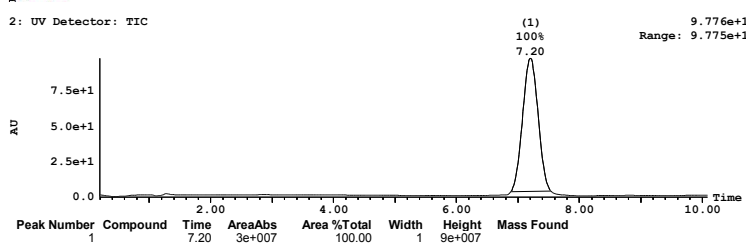

| Peak ID | Compound | Time | Mass Found |
|---------|----------|------|------------|
| 1       |          | 7.20 |            |

1: (Time: 7.20) 3.651 AU 1: (Time: 7.20) 2.1e+007

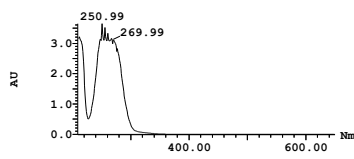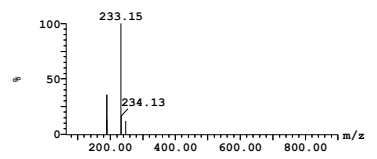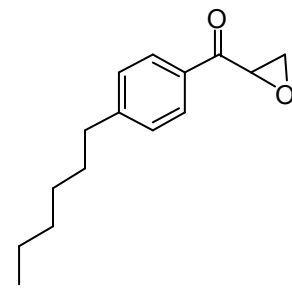

(4-hexylphenyl)(oxiran-2-yl)methanone
